# Supplementary material
Source: PubMed Central journal article supplement (PMC6436616)
Supplement: NIHMS1011024-supplement-Article_plus_Supplemental_Information.pdf [file NIHMS1011024-supplement-Article_plus_Supplemental_Information.pdf]

# PPAR $\gamma$ Interaction with UBR5/ATMIN Promotes DNA Repair to Maintain Endothelial Homeostasis

## Graphical Abstract

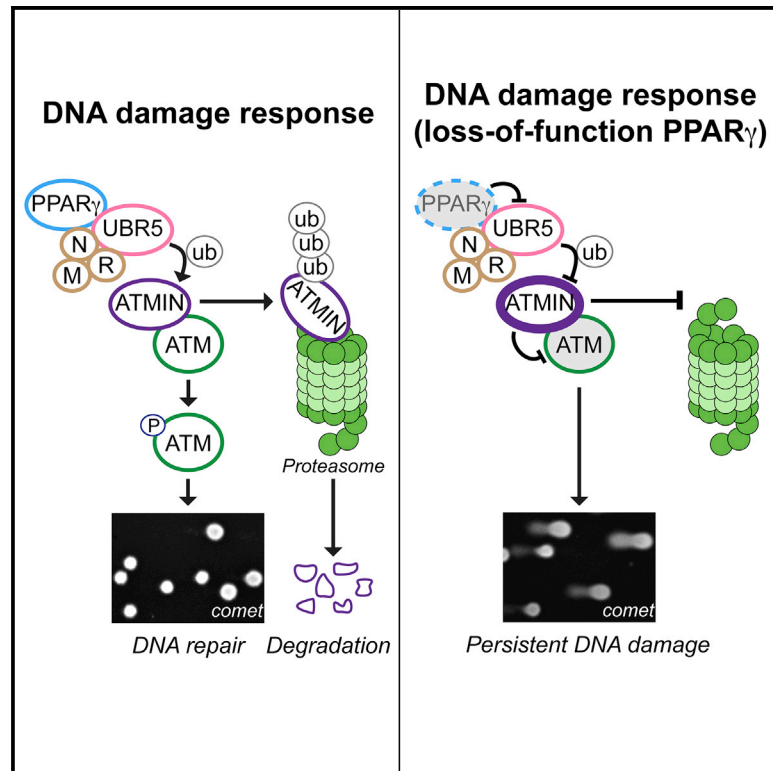

## Authors

Caiyun G. Li, Cathal Mahon, Nathaly M. Sweeney, ..., Mark Kaschwich, Karlene A. Cimprich, Marlene Rabinovitch

## Correspondence

marlener@stanford.edu

## In Brief

Li et al. identify PPAR $\gamma$  interactions with MRN and UBR5. PPAR $\gamma$  promotes UBR5-mediated ATMIN degradation, necessary for ATM activation upon DNA damage. Pulmonary arterial hypertension (PAH) endothelial cells exhibit genomic instability and disrupted PPAR $\gamma$ -UBR5 interaction. Blocking ATMIN restores ATM signaling in these cells, highlighting the significance of the PPAR $\gamma$ -ATMIN axis.

## Highlights

- PPAR $\gamma$  proteomics identifies interactions with the MRE11-RAD50-NBS1 complex and UBR5
- Upon DNA damage, PPAR $\gamma$  promotes UBR5-mediated ATMIN degradation to activate ATM
- PPAR $\gamma$ -UBR5 interaction is disrupted in endothelial cells isolated from PAH patients
- Depleting ATMIN in PAH endothelial cells restores ATM signaling upon DNA damage

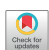

# PPAR $\gamma$ Interaction with UBR5/ATMIN Promotes DNA Repair to Maintain Endothelial Homeostasis

Caiyun G. Li,<sup>1</sup> Cathal Mahon,<sup>2,3</sup> Nathaly M. Sweeney,<sup>1,7</sup> Erik Verschuieren,<sup>2</sup> Vivek Kantamani,<sup>1</sup> Dan Li,<sup>1</sup> Jan K. Hennigs,<sup>1</sup> David P. Marciano,<sup>4</sup> Isabel Diebold,<sup>1</sup> Ossama Abu-Halawa,<sup>1</sup> Matthew Elliott,<sup>1</sup> Silin Sa,<sup>1</sup> Feng Guo,<sup>5</sup> Lingli Wang,<sup>1</sup> Aiqin Cao,<sup>1</sup> Christophe Guignabert,<sup>1</sup> Julie Sollier,<sup>6</sup> Nils P. Nickel,<sup>1</sup> Mark Kaschwich,<sup>1</sup> Karlene A. Cimprich,<sup>6</sup> and Marlene Rabinovitch<sup>1,8,\*</sup>

<sup>1</sup>The Vera Moulton Wall Center for Pulmonary Vascular Disease, Department of Pediatrics and Cardiovascular Institute, Stanford School of Medicine, Stanford, CA 94305, USA

<sup>2</sup>California Institute for Quantitative Biosciences, Department of Cellular and Molecular Pharmacology, University of California-San Francisco, San Francisco, CA 94158, USA

<sup>3</sup>Department of Pharmaceutical Chemistry, University of California-San Francisco, San Francisco, CA 94158, USA

<sup>4</sup>Department of Genetics, Stanford School of Medicine, Stanford, CA 94305, USA

<sup>5</sup>Department of Medicine, Stanford School of Medicine, Stanford, CA 94305, USA

<sup>6</sup>Department of Chemical and Systems Biology, Stanford School of Medicine, Stanford, CA 94305, USA

<sup>7</sup>Present address: Department of Pediatrics University of California-San Diego, San Diego, CA 92103, USA

<sup>8</sup>Lead Contact

\*Correspondence: [marlener@stanford.edu](mailto:marlener@stanford.edu)

<https://doi.org/10.1016/j.celrep.2019.01.013>

## SUMMARY

Using proteomic approaches, we uncovered a DNA damage response (DDR) function for peroxisome proliferator activated receptor  $\gamma$  (PPAR $\gamma$ ) through its interaction with the DNA damage sensor MRE11-RAD50-NBS1 (MRN) and the E3 ubiquitin ligase UBR5. We show that PPAR $\gamma$  promotes ATM signaling and is essential for UBR5 activity targeting ATM interactor (ATMIN). PPAR $\gamma$  depletion increases ATMIN protein independent of transcription and suppresses DDR-induced ATM signaling. Blocking ATMIN in this context restores ATM activation and DNA repair. We illustrate the physiological relevance of PPAR $\gamma$  DDR functions by using pulmonary arterial hypertension (PAH) as a model that has impaired PPAR $\gamma$  signaling related to endothelial cell (EC) dysfunction and unresolved DNA damage. In pulmonary arterial ECs (PAECs) from PAH patients, we observed disrupted PPAR $\gamma$ -UBR5 interaction, heightened ATMIN expression, and DNA lesions. Blocking ATMIN in PAH PAEC restores ATM activation. Thus, impaired PPAR $\gamma$  DDR functions may explain the genomic instability and loss of endothelial homeostasis in PAH.

## INTRODUCTION

Peroxisome proliferator activated receptor  $\gamma$  (PPAR $\gamma$ ) is a member of the nuclear receptor family that interacts with canonical retinoic acid receptors (RXR) (Chandra et al., 2008) and other co-factors as a transcription factor complex in multiple cell types, including vascular cells (Alastalo et al., 2011). Aberrant

PPAR $\gamma$ -mediated transcription has been implicated in disease conditions, including obesity, diabetes, cancer, inflammation, and vascular disorders (Ahmadian et al., 2013; Rabinovitch, 2010) that include atherosclerosis (Duval et al., 2002), aortic aneurysm (Hamblin et al., 2010), and pulmonary arterial hypertension (PAH) (Rabinovitch, 2010). Endothelial dysfunction is a feature of all these vascular diseases, and in PAH, it is associated with the obliteration and loss of microvessels that increase resistance to pulmonary blood flow and can culminate in heart failure and the need for a lung transplant (Rabinovitch, 2012).

Mice with PPAR $\gamma$  deleted in endothelial cells (ECs) (*Tie2-PPAR $\gamma$ <sup>-/-</sup>*) develop pulmonary hypertension that persists upon re-exposure to room air after hypoxia (Guignabert et al., 2009). In human pulmonary arterial ECs (PAECs), an interaction between PPAR $\gamma$  and  $\beta$ -catenin co-regulates the gene expression of apelin, a major factor that promotes PAEC survival and suppresses smooth muscle cell proliferation (Alastalo et al., 2011). This interaction is disrupted by rosiglitazone, an agonist previously used to treat type II diabetes (Alastalo et al., 2011). These observations reinforce the need to discover interactions between PPAR $\gamma$  and other proteins that are perturbed in PAH and other vascular disorders and have pharmacologic relevance.

Here, we report the results of a proteomic approach using affinity purification with mass spectrometry (AP-MS) to identify PPAR $\gamma$  nuclear interacting proteins. These studies uncovered PPAR $\gamma$  interactions with the DNA damage sensor MRN (MRE11-RAD50-NBS1) and the E3 ubiquitin ligase UBR5 and a role for PPAR $\gamma$  in the DNA damage response (DDR) pathway. We showed that PPAR $\gamma$  promotes UBR5 ubiquitin ligase activity and regulates ATM interactor (ATMIN) levels, thereby permitting efficient ATM phosphorylation and the initiation of DNA repair upon DNA damage. Perturbation of this axis is observed in PAH and can account for unresolved DNA damage that is associated with impaired endothelial functions (de Jesus Perez et al., 2014; Diebold et al., 2015).

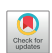

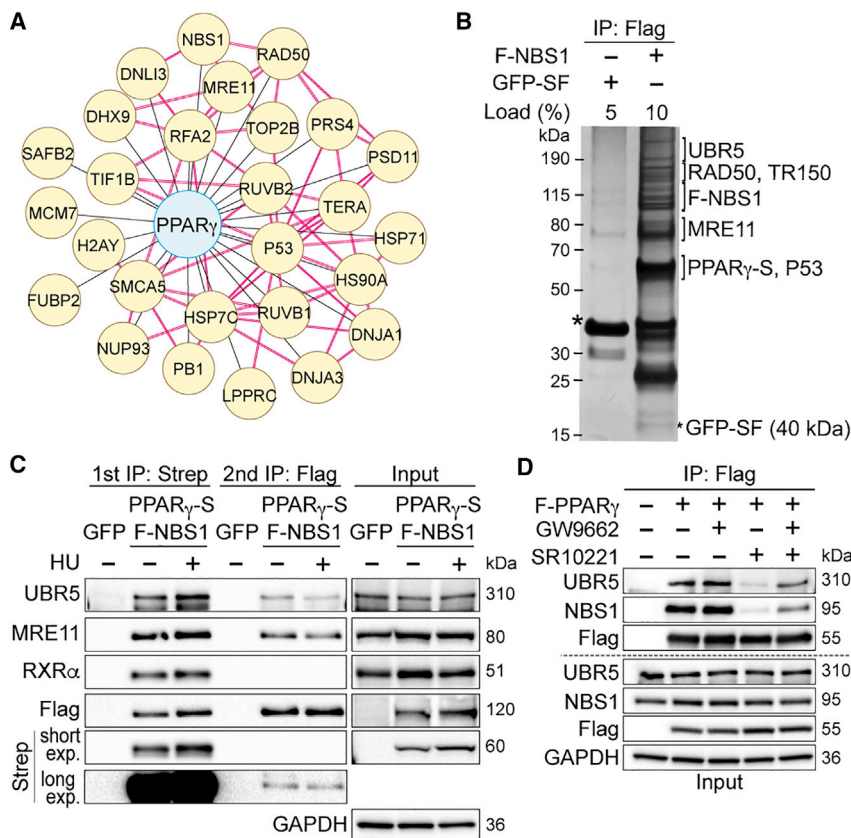

**Figure 1. PPAR $\gamma$  Interacts with the MRE11-RAD50-NBS1 (MRN) Complex and UBR5 in 293T Cells**

(A) A network of PPAR $\gamma$  and its interactors (yellow) in the DNA damage response (DDR) and DNA replication pathway. Red connections denote interactions obtained from the protein complex enrichment analysis tool (COMPLEAT) database.

(B) Silver staining shows gel fragments containing proteins (identified by MS) sequentially co-purified with tagged PPAR $\gamma$  (-2xStrep, S) and NBS1 (-FLAG, F) but not with green fluorescent protein (GFP-SF).

(C) Representative immunoblots of interactions between the PPAR $\gamma$ -NBS1 complex with RXR $\alpha$  and UBR5 upon hydroxyurea (HU) treatment (24 h).

(D) The 293T cells expressing FLAG-PPAR $\gamma$  were pretreated with GW9662 (5  $\mu$ M, 1 h) and treated with SR10221 (5  $\mu$ M, 24 h) (GW+SR). Controls included are cells treated with DMSO (vehicle), GW9662, or SR10221 only. Cells expressing FLAG-vector were used as the immunoprecipitation negative control. Representative immunoblots show effects of GW9662 pretreatment together with SR10221 on interactions between PPAR $\gamma$  and UBR5/NBS1.

See also Figures S1 and S2 and Tables S1–S4.

## RESULTS

### AP-MS Identified PPAR $\gamma$ Interactions with MRN and UBR5 Independent of RXR $\alpha$

We transiently transfected 293T cells with a FLAG-tagged PPAR $\gamma$ 1 construct and isolated nuclear extracts in the presence of micrococcal nuclease for affinity purification using a FLAG antibody. We used 293T cells for their high transfection efficiency that permitted efficient pull-down of FLAG-PPAR $\gamma$  and detection of interactors. The quadruplicate AP-MS screen revealed 352 proteins that co-purified with FLAG-PPAR $\gamma$  with a log<sub>2</sub> fold change (Log<sub>2</sub>FC) of >1.5 and an adjusted p value (adj. P)  $\leq$  0.05 (Figure S1A). Not surprisingly, we detected known PPAR $\gamma$  interactors, such as mediator of RNA polymerase II transcription subunit 1 and 24 (MED1 and MED24, respectively), promyelocytic leukemia protein (PML), p53, and others. We ranked 87 proteins as high-confidence PPAR $\gamma$ -interacting proteins, and those included the canonical partners RXR $\alpha$  and  $\beta$  (Figure S1A; Table S1). Using databases of published physical and functional interactions, we constructed and analyzed networks of high confidence proteins for enriched biological functions. In addition to cellular metabolism, we observed DDR and DNA replication among the most enriched functions (Figure 1A; Table S2). From the DDR network, four interactions were verified by co-immunoprecipitation, i.e., the components of the DNA damage sensing complex MRN (MRE11-RAD50-NBS1) and p53 (Figure S1B).

MRN initiates the DDR pathway using NBS1 to recruit proteins necessary for DNA repair (Reinhardt and Yaffe, 2013). We hypothesize that PPAR $\gamma$  binds to MRN via NBS1. To test this, we used tandem affinity purification (TAP) of PPAR $\gamma$ -2x Streptavidin (PPAR $\gamma$ -2xStrep) and FLAG-NBS1 in 293T cells, and the crosslinking agent bis(sulfosuccinimidyl)suberate (BS3) was added on beads before elution. The crosslinked immunocomplexes were analyzed by mass spectrometry (XL-MS) (Figure S1C). XL-MS identified three PPAR $\gamma$  peptides crosslinked to NBS1 (Figure S1D), demonstrating a direct interaction. Using structural mapping based on PPAR $\gamma$  crystal structure (Chandra et al., 2008), we located two of the three peptides in the zinc-finger motif within the PPAR $\gamma$  DNA-binding domain (DBD) and one in the ligand-binding domain (LBD) (Figures S1E and S1F). These data suggest that NBS1 binding might interfere with PPAR $\gamma$  transcription factor function. We used size-exclusion chromatography of nuclear extracts overexpressing PPAR $\gamma$ -2xStrep and FLAG-NBS1 and showed that PPAR $\gamma$  exists in multiple pools: a higher molecular weight (MW, approximated >1,500 kDa) pool, a lower MW (approximated 67–440 kDa) pool, and a monomeric pool (from overexpression, <67 kDa). NBS1 and RXR $\alpha$  reside in the high and low MW PPAR $\gamma$  pools, respectively, supporting mutually exclusive PPAR $\gamma$  interactions with NBS1 or RXR $\alpha$  (Figure S2A). In the absence of NBS1, we also found that PPAR $\gamma$  and three out of the seven PPAR $\gamma$  target genes were upregulated (Figure S2B). The requirement of PPAR $\gamma$ -LBD for MRN interactions was confirmed using mutagenesis (Figure S2C). These data suggest that upon MRN binding, PPAR $\gamma$  undergoes structural changes, which can interfere with its transcription factor property, implicating an independent function for PPAR $\gamma$ .

To investigate PPAR $\gamma$  functions in relation to MRN binding, we performed initial silver staining of the TAP elution from unperturbed cell lysates and identified all components of MRN but not RXR $\alpha$  (Figure 1B), supporting our XL-MS and size-exclusion chromatography results. Silver-stained gel fragments from the TAP elution also identified TR150 (thyroid hormone receptor-associated protein 3, encoded by *THRAP3*) and the ubiquitin ligase UBR5 co-purifying with the PPAR $\gamma$ -MRN complex (Figure 1B). Under conditions of DNA damage induced by hydroxyurea (HU), TAP-MS revealed associations of UBR5 and TR150 with the PPAR $\gamma$ -MRN complex (Figure 1C; Tables S3 and S4). We performed nuclear co-immunoprecipitation (co-IP) of endogenous UBR5 and NBS1 and showed that both UBR5 and NBS1 bind strongly to PPAR $\gamma$  but weakly to each other (Figure S2D). This was confirmed by co-IP of UBR5 and PPAR $\gamma$  in the absence of NBS1 (Figure S2E). To verify the specificity of these PPAR $\gamma$  interactions, we altered PPAR $\gamma$  conformations by using the pharmacological modulator SR10221, which destabilizes helix 12 in the PPAR $\gamma$  LBD (Marciano et al., 2015). SR10221 disrupted PPAR $\gamma$  interactions with MRN and UBR5, which were restored by pre-treatment with GW9662, which blocks the SR10221 target site (Figure 1D). Our proteomic and biochemical data suggest that PPAR $\gamma$  interactions with MRN and UBR5 implicate a potential role for PPAR $\gamma$  in the DDR pathway.

### PPAR $\gamma$ Promotes the Initiation of ATM Signaling

The MRN complex (Lee and Paull, 2004) and UBR5 (Zhang et al., 2014) are required for ATM activity, which is necessary for DNA repair induced by genotoxic agents. In this study, we activated ATM signaling using doxorubicin (DoxR), which intercalates DNA and generates double-strand breaks (Kurz et al., 2004), and HU, which induces replication fork collapse and a progressive accumulation of double-strand breaks (Cuadrado et al., 2006). We first verified endogenous nuclear PPAR $\gamma$  interactions with UBR5 and MRN at baseline and in response to DoxR or HU (Figure 2A). To determine if PPAR $\gamma$  is necessary for ATM activation, we depleted PPAR $\gamma$  using small interfering RNA (siRNA) and induced damage using HU and DoxR. The loss of PPAR $\gamma$  and UBR5 reduced HU-mediated ATM phosphorylation (pATM, Ser1981) and its targets KAP1 (Ser824) (Ziv et al., 2006),  $\gamma$ H2AX (Ser139) (Burma et al., 2001), and SMC1 (Ser966) (Yazdi et al., 2002) (which was not affected by siUBR5) (Figure 2B; densitometry in Figure S3A). PPAR $\gamma$ /UBR5-dependent ATM signaling was also evident in response to DoxR treatment (Figure S3B). We further investigated the role of PPAR $\gamma$  in HU-induced DNA damage because replication stress damage is relevant to PAH (de Jesus Perez et al., 2014).

### PPAR $\gamma$ and UBR5 Modulate ATMIN Protein Levels through Ubiquitination

To understand how PPAR $\gamma$  and UBR5 regulate ATM signaling, we determined whether PPAR $\gamma$  is required for UBR5 E3 ubiquitin ligase activity. Indeed, PPAR $\gamma$  depletion inhibited UBR5-mediated ubiquitination, judging by a decrease in ubiquitinated proteins immunoprecipitated with UBR5 (Figure 2C). We further investigated whether PPAR $\gamma$  depletion affects ATMIN levels, an UBR5 substrate that regulates ATM phosphorylation. Previous studies indicated that UBR5 ubiquitinates ATMIN upon

ionizing radiation to release and allow ATM activation (Zhang et al., 2014; Zhang et al., 2012). In contrast, other studies have shown the opposite with replication stress, i.e., that loss of ATMIN suppresses ATM activation (Schmidt et al., 2014).

Here, we observed that upon depletion of PPAR $\gamma$  or UBR5, ATMIN levels were elevated both at baseline and in response to HU in association with the suppression of the ATM target pRPA2 (Ser4/8) (Liu et al., 2012) (Figures 2D and 2E; densitometry in Figures S3C and S3D). Consistent with the function for PPAR $\gamma$  related to UBR5 ubiquitin ligase activity, elevated ATMIN protein in the absence of PPAR $\gamma$  or UBR5 was accompanied by a decrease in its ubiquitination (Figure 2F). Moreover, ubiquitination of ATMIN was associated with its degradation since the proteasome inhibitor MG132 maintains ATMIN protein levels (Figure 2F, input panel). In the absence of UBR5, PPAR $\gamma$  remained bound to the truncated FLAG-ATMIN (aa1-354), supporting UBR5 as downstream of PPAR $\gamma$  in ATMIN regulation (Figure S3E). In addition, both UBR5 and PPAR $\gamma$  bind to FLAG-ATMIN with and without HU, with UBR5 binding more sustained upon HU treatment (Figure S3F). The effects of PPAR $\gamma$  depletion on protein degradation was further evident judging by the reduced cellular lysine (K)48-linked ubiquitins, which represent protein degradative signals (Glickman and Ciechanover, 2002). This reduction was restored by overexpressing siRNA-resistant PPAR $\gamma$  (siResPPAR $\gamma$ ) (Figure S3G). Since PPAR $\gamma$  is a transcription factor, we confirmed that ATMIN mRNA levels were not significantly altered by the depletion of PPAR $\gamma$  or of UBR5 (Figure 2G). Taken together, our data indicate that the loss of PPAR $\gamma$  alters cellular protein degradative signals and, specifically, it increases ATMIN levels by suppressing UBR5-mediated ubiquitination, and that this function is not related to PPAR $\gamma$ -mediated transcription.

### PPAR $\gamma$ -DDR Function Is Conserved in ECs

We and others showed that PPAR $\gamma$  promotes endothelial survival and regeneration (Alastalo et al., 2011; Vattulainen-Collanus et al., 2016). In a transgenic mouse with deficient endothelial PPAR $\gamma$ , pulmonary hypertension and adverse vascular remodeling did not reverse following re-exposure to room air after chronic hypoxia (Guignabert et al., 2009). As impaired PPAR $\gamma$  function and chromosomal instability related to persistent DNA damage are features of PAECs from patients with PAH (Aldred et al., 2010), we determined if PPAR $\gamma$  functions in DDR are compromised in PAH and could contribute to the loss of vascular homeostasis.

We first verified nuclear PPAR $\gamma$  and UBR5 interactions in primary human PAECs (Figure 3A). Consistent with our findings in 293T cells, PPAR $\gamma$  depletion in PAECs also led to reduced pATM, pRPA2, and  $\gamma$ H2AX upon prolonged HU treatment (Figure 3B; densitometry, Figures S4A and S4B). To confirm the specificity of PPAR $\gamma$ -ATM signaling, we restored pATM in human umbilical venous ECs (HUVECs) by overexpressing siResPPAR $\gamma$  (Figure 3C; densitometry, Figure S4C). HUVECs were used to withstand the cytotoxicity from DNA and siRNA sequential transfections. Verifying ATMIN regulation of PPAR $\gamma$ -dependent ATM signaling in ECs, we depleted ATMIN in addition to PPAR $\gamma$  and observed that this restored pATM and its target pKAP1 (Figure 3D; densitometry, Figure S4D). Although ATMIN regulation of ATM signaling is highly context dependent



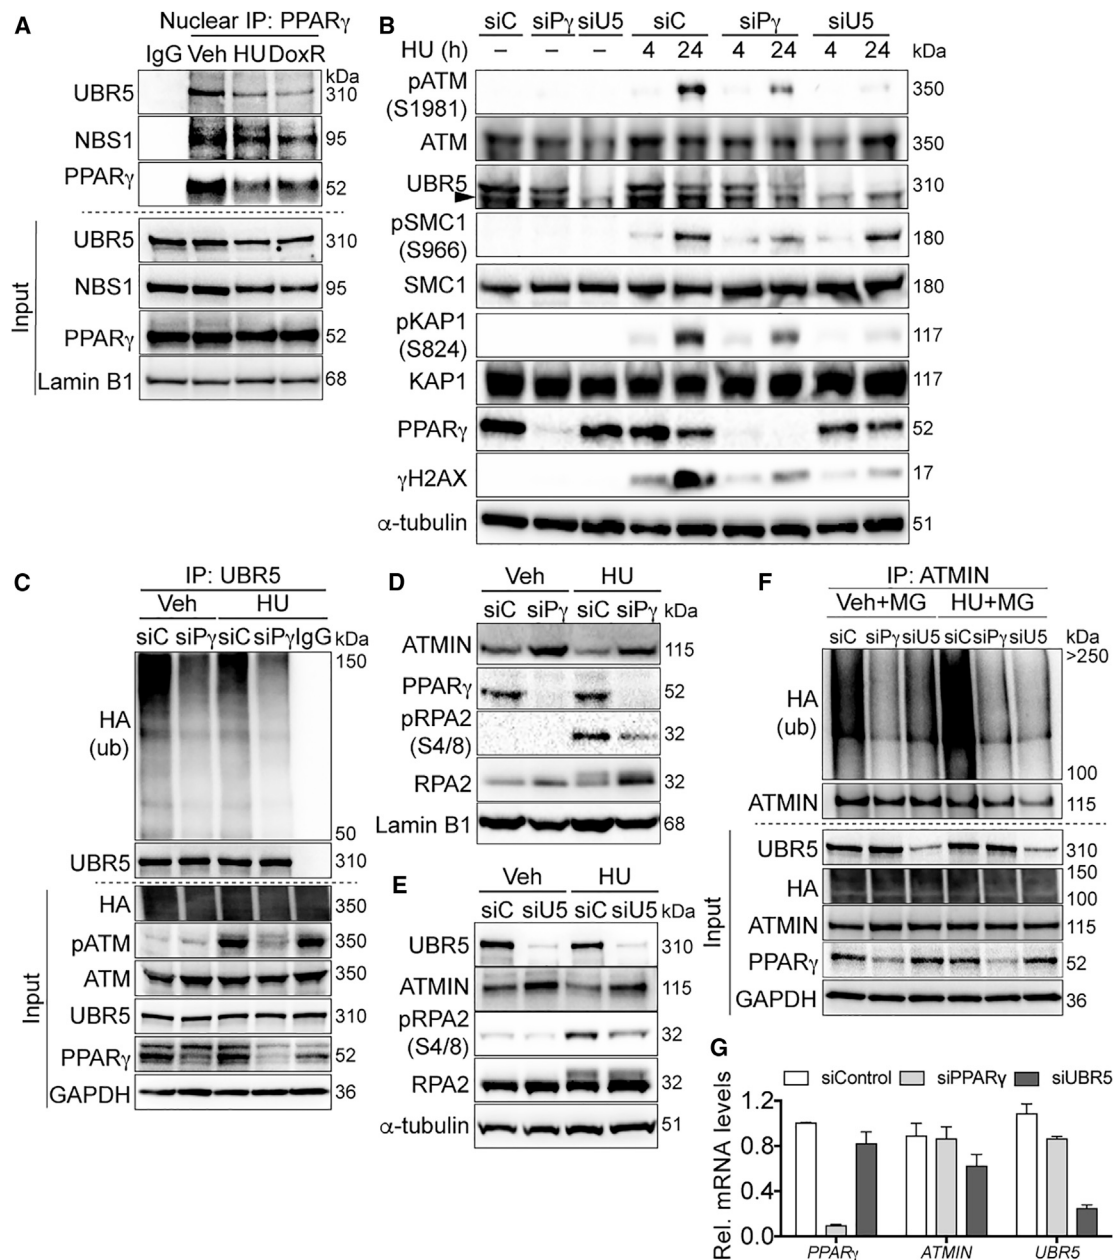

**Figure 2. PPAR $\gamma$  Promotes ATM Signaling by Increasing UBR5-Mediated ATMIN Ubiquitination in 293T Cells**

(A) Representative immunoblots of endogenous nuclear PPAR $\gamma$  interactions with MRN and UBR5 at baseline and upon DNA damage induced by HU and doxorubicin (DoxR).

(B) Representative immunoblots of HU-induced pATM and its targets with PPAR $\gamma$  or UBR5 depletion.

(C) Representative immunoblots of reduced UBR5 binding to ubiquitinated proteins with PPAR $\gamma$  depletion.

(D and E) Representative immunoblots of ATMIN and pRPA2 levels with PPAR $\gamma$  (D) or UBR5 (E) depletion upon HU treatments.

(F) Cells were transfected with HA-tagged ubiquitin and subsequently the siRNA as indicated. Cells were treated with the proteasome inhibitor MG132 (MG) for 2 h before lysis in a denaturing buffer. Endogenous ATMIN was immunoprecipitated to determine its polyubiquitinated form. Representative immunoblots show effects of PPAR $\gamma$  or UBR5 depletion on endogenous ATMIN ubiquitination detected by anti-hemagglutinin (HA) antibody.

(G) Quantitative real-time PCR shows effects of PPAR $\gamma$  or UBR5 depletion by the respective siRNA on *ATMIN* mRNA levels (normalized to  $\beta$ -actin mRNA).

siC, siControl; siP $\gamma$ , siPPAR $\gamma$ ; siU5, siUBR5; Veh, vehicle. Error bars, mean  $\pm$  SEM.

See also Figure S3.

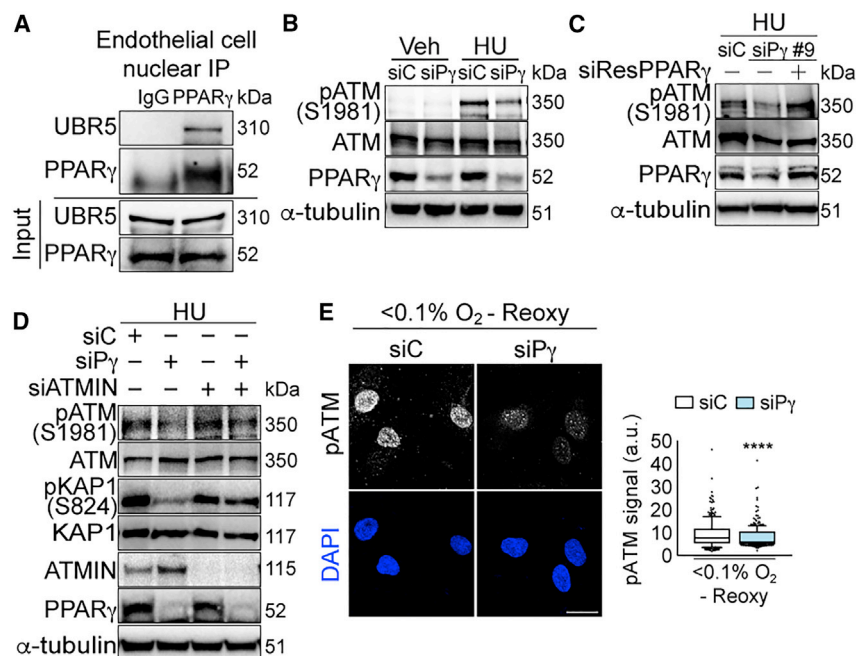

**Figure 3. PPAR $\gamma$ -ATMIN Regulation of ATM Signaling Is Conserved in Primary Human Endothelial Cells**

(A) Representative immunoblots of endogenous nuclear PPAR $\gamma$  interaction with UBR5 in primary pulmonary arterial endothelial cells (PAECs) isolated from controls (Table S5).

(B) Representative immunoblots of HU-induced pATM expression with PPAR $\gamma$  depletion in PAECs. (C) Representative immunoblots of restoration of HU-induced pATM expression with siRNA (siPPAR $\gamma$ #9)-resistant PPAR $\gamma$  overexpression in human umbilical venous ECs (HUVECs).

(D) Representative immunoblots of HU-induced pATM and pKAP1 with PPAR $\gamma$  or/and ATMIN depletions in PAECs.

(E) Confocal microscopy of PAECs shows effects of PPAR $\gamma$  depletion on pATM foci with hypoxia (<math><0.1\% O\_2</math>, 24 h) and reoxygenation (10 min). The line in the box of the box and whisker plots marks the median and whiskers correspond to the 10<sup>th</sup> to 90<sup>th</sup> percentiles. Unpaired Student t test was used. \*\*\*\*p < 0.0001. Scale bars, 20  $\mu$ m. siC, siControl; siPy, siPPAR $\gamma$ . See also Figure S4.

(Leszczynska et al., 2016; Schmidt et al., 2014; Zhang et al., 2014), our results demonstrate that in the absence of PPAR $\gamma$ , abnormal accumulation of ATMIN suppresses ATM activation in response to DNA damage.

We also verified the inhibitory effects of siPPAR $\gamma$  on pATM and  $\gamma$ H2AX foci by using immunofluorescence in PAEC (Figures S4E and S4F). This response was replicated with three individual siRNAs targeting PPAR $\gamma$  (Figure S4G). Importantly, the reduced ATM signaling upon PPAR $\gamma$  depletion was not due to altered cell cycle progression (Figure S4H). Since elevated oxidative stress has been implicated in PAH pathogenesis (Diebold et al., 2015) and ATM signaling is activated by oxidative stress (Hammond et al., 2003), we investigated if PPAR $\gamma$  also promotes ATM signaling upon oxidant injury. By exposing PAECs to hypoxia (<math><0.1\% O\_2</math>, 24 h) and reoxygenation (10 min), we detected the presence of 8-oxo-2'-deoxyguanosine (8-oxo-dG) foci (S4I), a marker for oxidative damage DNA (Cheng et al., 1992). We showed that PPAR $\gamma$  depletion also suppressed oxidative stress-induced pATM (Figure 3E; replicates, Figure S4J).

### The PPAR $\gamma$ -ATMIN Axis Is Required for Endothelial DNA Repair and Homeostasis

We now showed that PPAR $\gamma$  is necessary to initiate the DDR, and we hypothesize that it is also important for DNA repair. We used the comet assay and demonstrated that PPAR $\gamma$  depletion did not affect the magnitude of DNA damage, as judged by comet tails assessed after a 6-h exposure to HU (Figure 4A; replicates, Figure S5A), but the capacity to repair DNA was reduced, as judged by persistent comet tails after a 24-h recovery period. We also examined levels of pRPA2 and  $\gamma$ H2AX damage foci during recovery (24–72 h), as evidence of unrepaired DNA lesions. These foci were resolved in the control cells but were sustained in PPAR $\gamma$ -depleted PAECs (Figure 4B; replicates, Figure S5B).

We validated that ATMIN also functions in PPAR $\gamma$ -dependent DNA repair by demonstrating that depletion of ATMIN in addition to PPAR $\gamma$  resolved pRPA2 foci during recovery (Figures 4C and 4D; densitometry and replicates, Figures S5C and S5D).

We then determined whether unresolved DNA damage accompanied the pulmonary hypertension that did not reverse in mice with PPAR $\gamma$  depleted in ECs (*Tie2-Ppar $\gamma$ <sup>-/-</sup>*) that were re-exposed to room air after chronic hypoxia (Guignabert et al., 2009). Lung sections from *Tie2-Ppar $\gamma$ <sup>-/-</sup>* mice and wild-type littermates were co-stained with von Willebrand factor (vWF) antibody to detect ECs and  $\gamma$ H2AX antibody. Confocal microscopy revealed increased  $\gamma$ H2AX in the ECs of the mutant versus control mice previously studied following re-exposure to room air (Figure 4E). These data further supported our mechanistic studies in cultured PAECs that link PPAR $\gamma$  to regulation of DNA damage sensing and repair.

### Reduced PPAR $\gamma$ -UBR5 Interaction, Elevated ATMIN, and Impaired DDR in PAH-PAEC

The loss of genome integrity and an increased propensity for apoptosis and transformation are key features of PAECs from PAH patients (PAH-PAECs) (Aldred et al., 2010; Hopper et al., 2016; Ranchoux et al., 2015; Sa et al., 2016). We, therefore, assessed evidence of unrepaired DNA damage in PAH versus unused donor control lung sections and in cultured PAECs harvested from explanted PAH lungs and from control lungs. Demographic information related to controls (unused donor) and PAH-PAECs is provided in Table S5. Representative cell images indicating healthy, actively proliferating primary PAEC cultures are shown in Figure S6A.

Increased  $\gamma$ H2AX foci were evident in PAH versus control PAECs in lung tissue sections (Figure 5A), and in cell cultures, there were more extended comet tails (Figure 5B) in PAH-PAECs

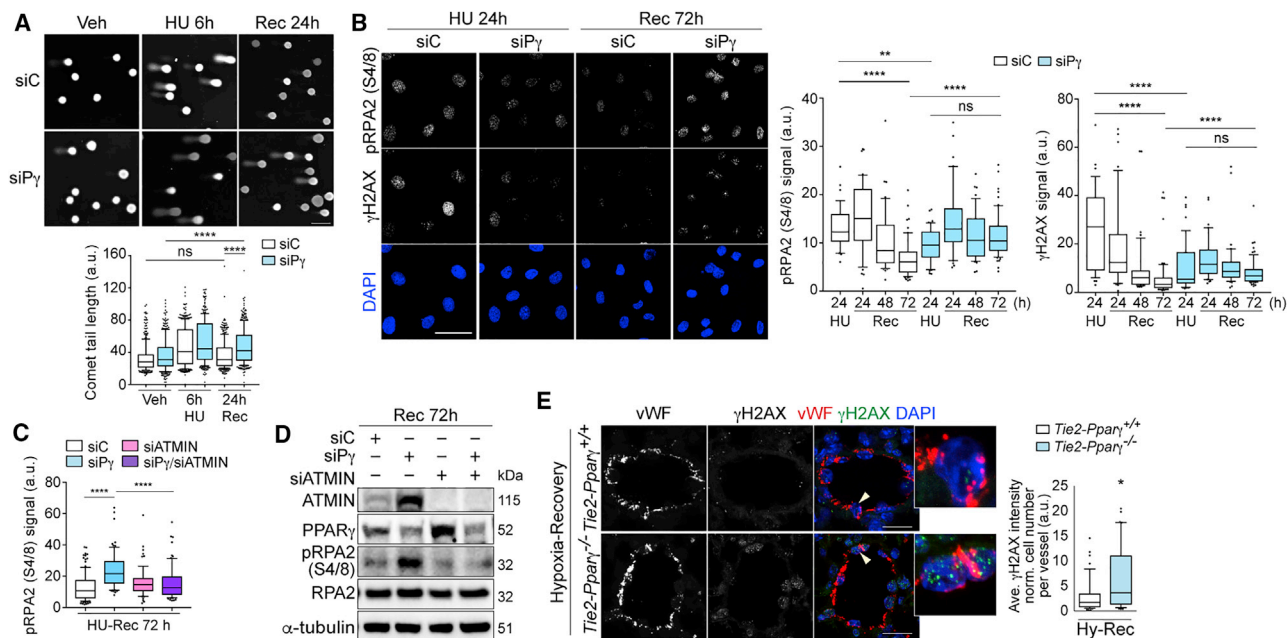

**Figure 4. PPAR $\gamma$  Promotes DNA Repair through ATMIN in Primary Human ECs**

(A) Comet assay shows effects of PPAR $\gamma$  depletion on comet tail lengths after 24-h recovery (Rec 24h) from 6 h of HU (HU 6h) treatment. (B) Confocal microscopy shows effects of PPAR $\gamma$  depletion on unresolved  $\gamma$ H2AX and pRPA2 foci over 72 h after recovery (Rec 72h) from 24 h of HU (HU 24h) treatment. Recovery time points are as indicated. (C) Quantification of pRPA2 foci with PPAR $\gamma$  or/and ATMIN depletion. Cells were fixed and analyzed using confocal microscopy at 72 h after recovery from 24 h of HU treatment. (D) Representative immunoblots of ATMIN and pRPA2 levels from the same experimental as in (C). (E) Confocal microscopy shows staining of  $\gamma$ H2AX foci in pulmonary ECs (labeled by vWF) in *Tie2-Ppar $\gamma$ <sup>-/-</sup>* mice and wild-type littermates subjected to three weeks of hypoxia (Hy) (10% O<sub>2</sub>) and four weeks of recovery in room air (n = 5). Arrowheads indicate cells in insets. siC, siControl; siP $\gamma$ , siPPAR $\gamma$ . The line in the box of the box and whisker plots marks the median and whiskers correspond to the 10<sup>th</sup> to 90<sup>th</sup> percentiles (A, B, C, and E). Kruskal-Wallis ANOVA test with Dunn's test (A–C). Two-tailed Mann-Whitney test (E). \*p < 0.05; \*\*p < 0.01; \*\*\*\*p < 0.0001, ns., not significant. Scale bars, 50  $\mu$ m (A and B); 20  $\mu$ m (E). See also Figure S5.

compared with control-PAECs. Upon HU treatment, PAH-PAECs showed reduced pATM foci compared with control-PAECs (Figure 5C; replicates, Figure S6B).

Impaired ATM signaling in PAH-PAECs suggested that the PPAR $\gamma$ -UBR5-ATMIN axis may be dysfunctional in these cells. Indeed, reduced interactions between PPAR $\gamma$  and UBR5 in PAH-PAECs were evident when compared to control-PAECs (Figure 5D). This was independent of PPAR $\gamma$  levels that were similar in controls and PAH-PAECs (Figure 5D, input panel). A possible explanation could be PPAR $\gamma$  or UBR5 post-translational modifications (PTMs), which can confer structural changes that alter protein-protein interactions (Choi et al., 2014a). Consistent with the disruption of the PPAR $\gamma$ -UBR5 complex related to UBR5 ubiquitin ligase activity, we found heightened ATMIN expression in PAH versus control PAECs (Figure 5E; densitometry, Figure S6C). We confirmed that reducing ATMIN levels in PAH-PAECs restored HU-induced pATM foci formation to a level comparable to control-PAECs (Figure 5F; replicates, Figure S6D).

## DISCUSSION

Our data obtained from cultured cells, transgenic mice, and clinical samples reveal a non-canonical role for PPAR $\gamma$  in the DDR

and, subsequently, in DNA repair. Through its interactions with MRN and UBR5 independent of RXR $\alpha$ , PPAR $\gamma$  promotes ATM signaling in response to genotoxic stimuli. We propose a model in Figure 6, suggesting that the PPAR $\gamma$  DDR complex regulates the ATMIN-ATM interaction necessary for the activation of ATM in response to DNA damage. We provide data showing that PPAR $\gamma$  interaction with UBR5 is required for UBR5-mediated ubiquitination of multiple substrates, including ATMIN. A disrupted PPAR $\gamma$ -UBR5 complex in PAECs from PAH patients results in elevated ATMIN, impaired ATM signaling, and persistent DNA damage. Under these circumstances, reducing ATMIN can restore the DDR and result in efficient DNA repair.

There is much known about PPAR $\gamma$  function related to its transcriptional targets associated with adipocyte differentiation and lipid metabolism and their perturbation in obesity and diabetes (Ahmadian et al., 2013). Our previous work showing differences in the response to PPAR $\gamma$  agonists in endothelial (Alastalo et al., 2011) and smooth muscle cells (Hansmann et al., 2008) led to a more comprehensive investigation of proteins interacting with PPAR $\gamma$ . Using an unbiased proteomic approach in 293T cells, we detected RXR $\alpha$  and RXR $\beta$  but not other known PPAR $\gamma$  transcriptional co-factors, such as the nuclear receptor coactivators and corepressors (NCOAs and NCORs) (Koppen and Kalkhoven,

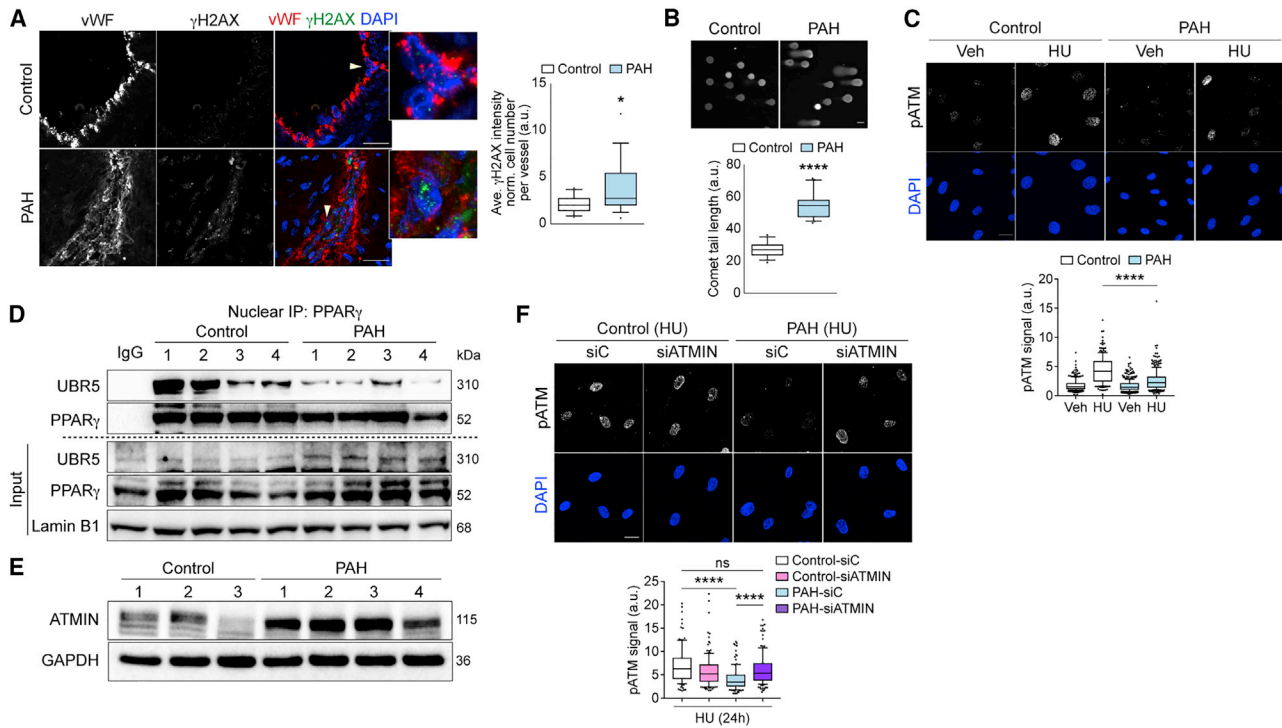

**Figure 5. The PPAR $\gamma$ -ATMIN Axis Is Impaired in PAH-PAECs with Genomic Instability**

(A) Confocal microscopy shows representative staining of  $\gamma$ H2AX foci in PAECs (labeled by vWF) in lung tissue sections from pulmonary arterial hypertension (PAH) patients (18 vessels, 5 subjects) and controls (19 vessels, 6 subjects). Arrowheads indicate cells in insets. (B) Representative comet assay of comet tail lengths in control and PAH-PAECs (n = 16 and 22, respectively). (C) Confocal microscopy shows pATM foci in controls and PAH-PAECs with HU treatment (24 h). (D) Representative immunoblots show nuclear endogenous interactions of PPAR $\gamma$  and UBR5 in controls and PAH-PAECs. (E) Representative immunoblots show elevated ATMIN levels in PAH-PAECs compared to controls. (F) Confocal microscopy shows pATM foci in controls and PAH-PAECs with siATMIN after HU treatment (24 h). siC, siControl. The line in the box of the box and whisker plots marks the median and whiskers correspond to the 10<sup>th</sup> to 90<sup>th</sup> percentiles (A–C and F). Two-tailed Mann-Whitney test (A and B). Kruskal–Wallis ANOVA test with Dunn’s test (C and F). \*p < 0.05; \*\*\*\*p < 0.0001, ns., not significant. Scale bars, 5  $\mu$ m (A); 20  $\mu$ m (B, C, and E). See also Figure S6.

2010) or  $\beta$ -catenin (Alastalo et al., 2011). Since these interactions were established in adipocytes and ECs, they might be cell-type specific and undetectable in 293T cells. We uncovered previously unknown interactions with MRN and UBR5 that are relevant to 293T and ECs and, hence, are likely of biological significance in other PPAR $\gamma$ -expressing cell types. Supporting this contention is evidence that PPAR $\gamma$  synthetic ligands synergize with platinum-based drugs by activating the DDR pathway and inducing apoptosis of non-small-cell lung cancer cells (Girnun et al., 2007; Khandekar et al., 2018).

PPAR $\gamma$  DDR functions implicated by its binding partners MRN and UBR5 support the notion that novel cellular functions can be uncovered by understanding protein–protein interactions. Understanding the NBS1–PPAR $\gamma$  binding interface by using XL-MS and biochemical studies indicates that PPAR $\gamma$  DDR functions would require its DBD and LBD, similar to its non-canonical function in degrading nuclear factor  $\kappa$ B (NF- $\kappa$ B)/p65 (Hou et al., 2012). We detected recently described PPAR $\gamma$  interactors, TR150 (Choi et al., 2014a; Khandekar et al., 2018). TR150 is part of the mediator complex, potentially involved in chromatin remodeling (Fondell et al., 1996). It also promotes PPAR $\gamma$ -mediated gene

transcription (Choi et al., 2014a), as well as functions in RNA processing (Beli et al., 2012). Further study is warranted to investigate whether PPAR $\gamma$  is related to any of these functions.

DDR activation requires layers of control, including the ubiquitination pathway, to ensure rapid modifications and trans-localization of proteins (Mirzoeva and Petrini, 2001, 2003; Polo and Jackson, 2011). UBR5 belongs to the HECT (homology to E6-AP carboxyl terminus) family of E3 ubiquitin ligases that maintains its substrates at optimal levels for effective signaling transduction. Some of the UBR5 substrates include an ubiquitin ligase, RNF168 (Gudjonsson et al., 2012), a pro-apoptotic protein, MOAP-1 (Matsuura et al., 2017), and an ATM modulator, ATMIN (Zhang et al., 2014), which act independently in the DDR pathway. Here, we demonstrated that PPAR $\gamma$  is necessary for UBR5 ubiquitin ligase activity and potentially has a broad effect on other UBR5 substrates.

We focused on ATMIN because of its relationship with ATM, the nature of which has been context dependent (Liu et al., 2017; Schmidt et al., 2014; Zhang et al., 2014). We used prolonged HU treatment to induce replication stress-dependent double-strand breaks and, hence, ATM signaling. HU-induced



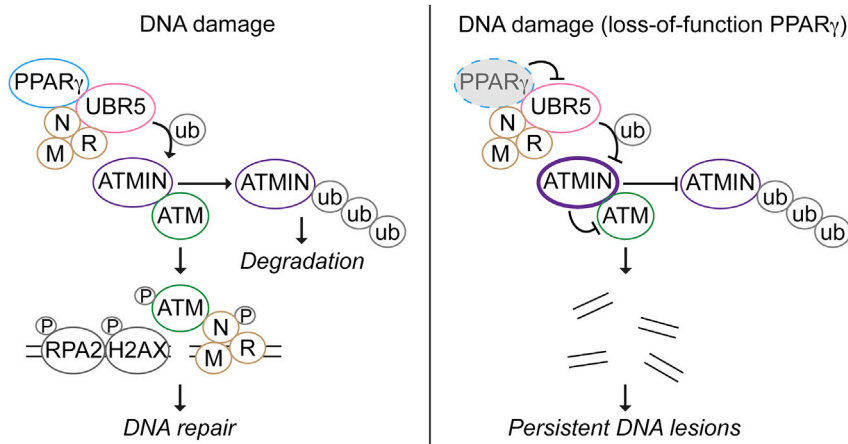

**Figure 6. Proposed Model for PPAR $\gamma$ -Mediated DNA Damage Response Signaling**

In response to DNA damage, ubiquitination of ATMIN is increased, leading to its proteasomal degradation to release ATM. ATM binds to NBS1 and is autophosphorylated (pATM) and recruited to the DNA lesions where ATM phosphorylates its targets, such as H2AX ( $\gamma$ H2AX) and RPA2 (pRPA2) to facilitate DNA repair. Where there is a loss of function of PPAR $\gamma$ , ATMIN ubiquitination by UBR5 is inhibited; hence, ATMIN accumulates. This suppresses ATM activation and its signaling, eventually leading to persistent DNA lesions and genomic instability. P, phosphorylation; ub, ubiquitination.

damage also closely resembles chronic replication-induced genotoxic insults associated with genomic instability in vascular ECs from PAH patients (Aldred et al., 2010; de Jesus Perez et al., 2014). In both 293T and ECs, increased ATMIN resulting from silencing PPAR $\gamma$  or UBR5 inhibited ATM signaling. Importantly, depleting ATMIN in this context restored pATM and DNA repair. We demonstrated that PPAR $\gamma$  or UBR5-mediated ATMIN ubiquitination is associated with its proteasomal degradation. Others have shown that ionizing radiation-induced ATMIN ubiquitination (via UBR5) does not lead to degradation (Zhang et al., 2014). We propose that in response to the nature and duration of the DNA damage stimulus, the type and amount of ATMIN ubiquitination might vary, producing either degradative or a non-degradative response. This “ubiquitin threshold” model has been previously proposed (Swatek and Komander, 2016) and could account for our observations linking PPAR $\gamma$  and UBR5 to ATMIN ubiquitination and degradation. In addition, the C-terminal ATMIN SQ or TQ motif cluster domain could be highly modified, especially in response to DNA damage (Jurado et al., 2010). We postulate that the aberrant increase in ATMIN protein and possibly its modifications in PPAR $\gamma$ - and UBR5-depleted cells sterically inhibit ATM activation in response to DNA damage (Figure 6). Determining precisely how this occurs could lead to opportunities to selectively modulate the DDR pathway.

ATMIN was first identified as a transcription factor for *DYNLL1*. Both ATMIN and *DYNLL1* are required for the initiation of lung budding during lung organogenesis (Goggolidou et al., 2014; Jurado et al., 2010). Distinguishing between ATMIN developmental and DDR functions by defining its targets of transcription or interacting partners would provide a greater understanding of ATMIN biology. Upstream of ATMIN, both PPAR $\gamma$ , and UBR5 knockout mice die in early embryonic life with developmental defects in the vasculature (Barak et al., 1999; Saunders et al., 2004). In the context of PAH, we postulate that the disrupted interactions between PPAR $\gamma$  and UBR5 would modulate the expression and activities of other substrates, which could be critical for EC function.

Our previous observations related to the role of PPAR $\gamma$  in the maintenance of endothelial homeostasis (Alastalo et al., 2011) and now in the DDR, coupled with an increasing body of

evidence showing genomic instability and DNA damage in PAECs and smooth muscle cells from patients with PAH (Aldred et al., 2010; Meloche et al., 2014), led us to investigate whether PPAR $\gamma$ -mediated DNA damage sensing was impaired. PAH is a progressive disease associated with severe vascular occlusion owing to EC dysfunction, judged by propensity to apoptosis, inability to form tubes in culture (Sa et al., 2016), and cellular transformation (Hopper et al., 2016; Ranchoux et al., 2015). Our study indicates that the PPAR $\gamma$ -ATMIN axis is indeed perturbed in PAECs from PAH patients, with high ATMIN levels related to impaired DNA damage sensing and repair.

The common response of 293T cells and primary ECs further strengthens the notion that, perturbations in the PPAR $\gamma$ -UBR5-ATMIN axis could potentially occur in multiple cell types where PPAR $\gamma$  is expressed and, hence, would be applicable to a wide range of disease mechanisms.

## STAR★METHODS

Detailed methods are provided in the online version of this paper and include the following:

- KEY RESOURCES TABLE
- CONTACT FOR REAGENT AND RESOURCE SHARING
- EXPERIMENTAL MODEL AND SUBJECT DETAILS
  - Cell culture
- METHOD DETAILS
  - siRNAs
  - Plasmids
  - Transient transfections
  - Nuclear extraction
  - Whole cell extraction
  - Immunoprecipitation
  - Denaturing immunoprecipitation
  - Immunoblotting
  - Size-exclusion chromatography
  - RNA extraction and quantitative PCR
  - Immunoprecipitation for mass spectrometry analyses
  - Mass spectrometry
  - Statistical analysis for AP-MS and TAP-MS

- EdU incorporation assay for cell cycle analysis
- Alkaline comet assay
- Hypoxia and Reoxygenation
- Immunofluorescence staining and confocal microscopy
- Immunofluorescence image analyses
- **QUANTIFICATION AND STATISTICAL ANALYSIS**
- **DATA AND SOFTWARE AVAILABILITY**

## SUPPLEMENTAL INFORMATION

Supplemental Information includes six figures and six tables and can be found with this article online at <https://doi.org/10.1016/j.celrep.2019.01.013>.

## ACKNOWLEDGMENTS

We thank A. Giaccia for helpful comments on the manuscript. We thank P. Griffin and T. Kamenecka (Scripps Research Institute, Florida) for providing PPAR $\gamma$  modulators; L. Nagy (University of Debrecen, Hungary), C. Craik (UCSF), N. Krogan (UCSF), H.-K. Lin (MD Anderson Cancer Center), and A. Behrens (King's College London) for providing plasmids; T. Desai (Stanford) for the use of the Leica confocal microscope; P.A. del Rosario (Stanford) for providing clinical information of the PHBI samples; and M. Fox and M. Roof (Stanford) for administrative assistance. We thank members of the Rabinovitch Lab and the Department of Radiation Oncology (Stanford) for their support. Mass spectrometry was performed at the Vincent Coates Foundation Mass Spectrometry Laboratory, Stanford University. Mass spectrometry was funded by award number S10RR027425 from the National Center For Research Resources. The Pulmonary Hypertension Breakthrough Initiative (PHBI) Network is funded by NIH/National Health, Lung, and Blood Institute (NHLBI) R24 HL123767 and the Cardiovascular Medical Research and Education Fund (CMREF) grant UL1RR024986. This work was supported by NIH/NHLBI grant R01 HL087118 (M.R.), fellowships from the Deutsche Forschungsgemeinschaft (He 6855/1-1 to J.K.H. and Ni 1456/1-1 to N.P.N.), and from the Deutsche Herzstiftung e.V. (S/06/11 to I.D.).

## AUTHOR CONTRIBUTIONS

C.G.L., C.M., and M.R. conceived the experiments; C.G.L. and M.R. interpreted all data and wrote the manuscript; C.G.L. performed most experiments; C.M. helped with cloning, immunoprecipitation, and data interpretation; N.M.S. performed immunofluorescence staining on tissue sections; E.V. carried out MS statistical analyses; V.K. performed the comet assay; D.L., O.A.-H., and M.E. performed PCR; J.K.H. helped with PCR; D.P.M. helped design experiments and provided PPAR $\gamma$  modulators; S.S. helped with primary cell cultures; F.G. performed size exclusion chromatography; L.W. and A.C. helped with isolation of PHBI lung cells; C.G. obtained animal tissue sections; J.S. and K.C. provided expertise on the DDR pathway; I.D., N.P.N., and M.K. provided help with animal experiments not included in the final version of manuscript; and all authors contributed to writing and provided feedback.

## DECLARATION OF INTERESTS

The authors declare no competing interests.

Received: May 14, 2018

Revised: November 30, 2018

Accepted: January 3, 2019

Published January 29, 2019

## REFERENCES

Ahmadian, M., Suh, J.M., Hah, N., Liddle, C., Atkins, A.R., Downes, M., and Evans, R.M. (2013). PPAR $\gamma$  signaling and metabolism: the good, the bad and the future. *Nat. Med.* **19**, 557–566.

Alastalo, T.P., Li, M., Perez, Vde.J., Pham, D., Sawada, H., Wang, J.K., Koskenvuo, M., Wang, L., Freeman, B.A., Chang, H.Y., and Rabinovitch, M. (2011). Disruption of PPAR $\gamma$ / $\beta$ -catenin-mediated regulation of apelin impairs BMP-induced mouse and human pulmonary arterial EC survival. *J. Clin. Invest.* **121**, 3735–3746.

Aldred, M.A., Comhair, S.A., Varella-Garcia, M., Asosingh, K., Xu, W., Noon, G.P., Thistlethwaite, P.A., Tudor, R.M., Erzurum, S.C., Geraci, M.W., and Col-dren, C.D. (2010). Somatic chromosome abnormalities in the lungs of patients with pulmonary arterial hypertension. *Am. J. Respir. Crit. Care Med.* **182**, 1153–1160.

Barak, Y., Nelson, M.C., Ong, E.S., Jones, Y.Z., Ruiz-Lozano, P., Chien, K.R., Koder, A., and Evans, R.M. (1999). PPAR gamma is required for placental, cardiac, and adipose tissue development. *Mol. Cell* **4**, 585–595.

Beli, P., Lukashchuk, N., Wagner, S.A., Weinert, B.T., Olsen, J.V., Baskcomb, L., Mann, M., Jackson, S.P., and Choudhary, C. (2012). Proteomic investigations reveal a role for RNA processing factor THRAP3 in the DNA damage response. *Mol. Cell* **46**, 212–225.

Burma, S., Chen, B.P., Murphy, M., Kurimasa, A., and Chen, D.J. (2001). ATM phosphorylates histone H2AX in response to DNA double-strand breaks. *J. Biol. Chem.* **276**, 42462–42467.

Chandra, V., Huang, P., Hamuro, Y., Raghuram, S., Wang, Y., Burris, T.P., and Rastinejad, F. (2008). Structure of the intact PPAR-gamma-RXR- nuclear receptor complex on DNA. *Nature* **456**, 350–356.

Cheng, K.C., Cahill, D.S., Kasai, H., Nishimura, S., and Loeb, L.A. (1992). 8-Hydroxyguanine, an abundant form of oxidative DNA damage, causes G—T and A—C substitutions. *J. Biol. Chem.* **267**, 166–172.

Choi, J.H., Choi, S.S., Kim, E.S., Jedrychowski, M.P., Yang, Y.R., Jang, H.J., Suh, P.G., Banks, A.S., Gygi, S.P., and Spiegelman, B.M. (2014a). Thrap3 docks on phosphoserine 273 of PPAR $\gamma$  and controls diabetic gene programming. *Genes Dev.* **28**, 2361–2369.

Choi, M., Chang, C.Y., Clough, T., Broudy, D., Killeen, T., MacLean, B., and Vitek, O. (2014b). MSstats: an R package for statistical analysis of quantitative mass spectrometry-based proteomic experiments. *Bioinformatics* **30**, 2524–2526.

Cox, J., and Mann, M. (2008). MaxQuant enables high peptide identification rates, individualized p.p.b.-range mass accuracies and proteome-wide protein quantification. *Nat. Biotechnol.* **26**, 1367–1372.

Cuadrado, M., Martinez-Pastor, B., Murga, M., Toledo, L.I., Gutierrez-Martinez, P., Lopez, E., and Fernandez-Capetillo, O. (2006). ATM regulates ATR chromatin loading in response to DNA double-strand breaks. *J. Exp. Med.* **203**, 297–303.

de Jesus Perez, V.A., Yuan, K., Lyuksyutova, M.A., Dewey, F., Orcholowski, M.E., Shuffle, E.M., Mathur, M., Yancy, L., Jr., Rojas, V., Li, C.G., et al. (2014). Whole-exome sequencing reveals TopBP1 as a novel gene in idiopathic pulmonary arterial hypertension. *Am. J. Respir. Crit. Care Med.* **189**, 1260–1272.

Diebold, I., Hennigs, J.K., Miyagawa, K., Li, C.G., Nickel, N.P., Kaschwich, M., Cao, A., Wang, L., Reddy, S., Chen, P.I., et al. (2015). BMPR2 preserves mitochondrial function and DNA during reoxygenation to promote endothelial cell survival and reverse pulmonary hypertension. *Cell Metab.* **21**, 596–608.

Duval, C., Chinetti, G., Trottein, F., Fruchart, J.C., and Staels, B. (2002). The role of PPARs in atherosclerosis. *Trends Mol. Med.* **8**, 422–430.

Fondell, J.D., Ge, H., and Roeder, R.G. (1996). Ligand induction of a transcriptionally active thyroid hormone receptor coactivator complex. *Proc. Natl. Acad. Sci. USA* **93**, 8329–8333.

Girnun, G.D., Naseri, E., Vafai, S.B., Qu, L., Szwajca, J.D., Bronson, R., Alberta, J.A., and Spiegelman, B.M. (2007). Synergy between PPARgamma ligands and platinum-based drugs in cancer. *Cancer Cell* **11**, 395–406.

Glickman, M.H., and Ciechanover, A. (2002). The ubiquitin-proteasome proteolytic pathway: destruction for the sake of construction. *Physiol. Rev.* **82**, 373–428.

- Goggolidou, P., Stevens, J.L., Agueci, F., Keynton, J., Wheway, G., Grimes, D.T., Patel, S.H., Hilton, H., Morthorst, S.K., DiPaolo, A., et al. (2014). ATMIN is a transcriptional regulator of both lung morphogenesis and ciliogenesis. *Development* *141*, 3966–3977.
- Gudjonsson, T., Altmeyer, M., Savic, V., Toledo, L., Dinant, C., Gröfte, M., Bartkova, J., Poulsen, M., Oka, Y., Bekker-Jensen, S., et al. (2012). TRIP12 and UBR5 suppress spreading of chromatin ubiquitylation at damaged chromosomes. *Cell* *150*, 697–709.
- Guignabert, C., Alvira, C.M., Alastalo, T.P., Sawada, H., Hansmann, G., Zhao, M., Wang, L., El-Bizri, N., and Rabinovitch, M. (2009). Tie2-mediated loss of peroxisome proliferator-activated receptor-gamma in mice causes PDGF receptor-beta-dependent pulmonary arterial muscularization. *Am. J. Physiol. Lung Cell. Mol. Physiol.* *297*, L1082–L1090.
- Hamblin, M., Chang, L., Zhang, H., Yang, K., Zhang, J., and Chen, Y.E. (2010). Vascular smooth muscle cell peroxisome proliferator-activated receptor-γ deletion promotes abdominal aortic aneurysms. *J. Vasc. Surg.* *52*, 984–993.
- Hammond, E.M., Dorie, M.J., and Giaccia, A.J. (2003). ATR/ATM targets are phosphorylated by ATR in response to hypoxia and ATM in response to reoxygenation. *J. Biol. Chem.* *278*, 12207–12213.
- Hansmann, G., de Jesus Perez, V.A., Alastalo, T.P., Alvira, C.M., Guignabert, C., Bekker, J.M., Schellong, S., Urashima, T., Wang, L., Morrell, N.W., and Rabinovitch, M. (2008). An antiproliferative BMP-2/PPARγ/apoE axis in human and murine SMCs and its role in pulmonary hypertension. *J. Clin. Invest.* *118*, 1846–1857.
- Hopper, R.K., Moonen, J.R., Diebold, I., Cao, A., Rhodes, C.J., Tojais, N.F., Hennigs, J.K., Gu, M., Wang, L., and Rabinovitch, M. (2016). In pulmonary arterial hypertension, reduced BMPR2 promotes endothelial-to-mesenchymal transition via HMGA1 and its target slug. *Circulation* *133*, 1783–1794.
- Hou, Y., Moreau, F., and Chadee, K. (2012). PPAR $\gamma$  is an E3 ligase that induces the degradation of NF $\kappa$ B/p65. *Nat. Commun.* *3*, 1300.
- Jurado, S., Smyth, I., van Denderen, B., Tennis, N., Hammet, A., Hewitt, K., Ng, J.L., McNeese, C.J., Kozlov, S.V., Oka, H., et al. (2010). Dual functions of ASCIZ in the DNA base damage response and pulmonary organogenesis. *PLoS Genet.* *6*, e1001170.
- Khandekar, M.J., Banks, A.S., Laznik-Bogoslavski, D., White, J.P., Choi, J.H., Kazak, L., Lo, J.C., Cohen, P., Wong, K.K., Kamenecka, T.M., et al. (2018). Noncanonical agonist PPAR $\gamma$  ligands modulate the response to DNA damage and sensitize cancer cells to cytotoxic chemotherapy. *Proc. Natl. Acad. Sci. USA* *115*, 561–566.
- Koppen, A., and Kalkhoven, E. (2010). Brown vs white adipocytes: the PPAR $\gamma$  coregulator story. *FEBS Lett.* *584*, 3250–3259.
- Kurz, E.U., Douglas, P., and Lees-Miller, S.P. (2004). Doxorubicin activates ATM-dependent phosphorylation of multiple downstream targets in part through the generation of reactive oxygen species. *J. Biol. Chem.* *279*, 53272–53281.
- Lee, J.H., and Paull, T.T. (2004). Direct activation of the ATM protein kinase by the Mre11/Rad50/Nbs1 complex. *Science* *304*, 93–96.
- Leszczynska, K.B., Göttgens, E.L., Biasoli, D., Olcina, M.M., Ient, J., Anbalagan, S., Bernhardt, S., Giaccia, A.J., and Hammond, E.M. (2016). Mechanisms and consequences of ATMIN repression in hypoxic conditions: roles for p53 and HIF-1. *Sci. Rep.* *6*, 21698.
- Liu, S., Opiyo, S.O., Manthey, K., Glanzer, J.G., Ashley, A.K., Amerin, C., Troksa, K., Shrivastav, M., Nickoloff, J.A., and Oakley, G.G. (2012). Distinct roles for DNA-PK, ATM and ATR in RPA phosphorylation and checkpoint activation in response to replication stress. *Nucleic Acids Res.* *40*, 10780–10794.
- Liu, R., King, A., Hoch, N.C., Chang, C., Kelly, G.L., Deans, A.J., and Heierhorst, J. (2017). ASCIZ/ATMIN is dispensable for ATM signaling in response to replication stress. *DNA Repair (Amst.)* *57*, 29–34.
- Marciano, D.P., Kuruvilla, D.S., Boregowda, S.V., Asteian, A., Hughes, T.S., Garcia-Ordóñez, R., Corzo, C.A., Khan, T.M., Novick, S.J., Park, H., et al. (2015). Pharmacological repression of PPAR $\gamma$  promotes osteogenesis. *Nat. Commun.* *6*, 7443.
- Matsuura, K., Huang, N.J., Cocce, K., Zhang, L., and Kornbluth, S. (2017). Downregulation of the proapoptotic protein MOAP-1 by the UBR5 ubiquitin ligase and its role in ovarian cancer resistance to cisplatin. *Oncogene* *36*, 1698–1706.
- Meloche, J., Pflieger, A., Vaillancourt, M., Paulin, R., Potus, F., Zervopoulos, S., Graydon, C., Courboulain, A., Breuils-Bonnet, S., Tremblay, E., et al. (2014). Role for DNA damage signaling in pulmonary arterial hypertension. *Circulation* *129*, 786–797.
- Mirzoeva, O.K., and Petrini, J.H. (2001). DNA damage-dependent nuclear dynamics of the Mre11 complex. *Mol. Cell. Biol.* *21*, 281–288.
- Mirzoeva, O.K., and Petrini, J.H. (2003). DNA replication-dependent nuclear dynamics of the Mre11 complex. *Mol. Cancer Res.* *1*, 207–218.
- Polo, S.E., and Jackson, S.P. (2011). Dynamics of DNA damage response proteins at DNA breaks: a focus on protein modifications. *Genes Dev.* *25*, 409–433.
- Rabinovitch, M. (2010). PPAR $\gamma$  and the pathobiology of pulmonary arterial hypertension. *Adv. Exp. Med. Biol.* *661*, 447–458.
- Rabinovitch, M. (2012). Molecular pathogenesis of pulmonary arterial hypertension. *J. Clin. Invest.* *122*, 4306–4313.
- Ranchoux, B., Antigny, F., Rucker-Martin, C., Hautefort, A., Péchoux, C., Bogaard, H.J., Dorfmueller, P., Remy, S., Lecerc, F., Planté, S., et al. (2015). Endothelial-to-mesenchymal transition in pulmonary hypertension. *Circulation* *131*, 1006–1018.
- Reinhardt, H.C., and Yaffe, M.B. (2013). Phospho-Ser/Thr-binding domains: navigating the cell cycle and DNA damage response. *Nat. Rev. Mol. Cell Biol.* *14*, 563–580.
- Sa, S., Gu, M., Chappell, J., Shao, N.Y., Ameen, M., Elliott, K.A., Li, D., Grubert, F., Li, C.G., Taylor, S., et al. (2016). iPSC model of pulmonary arterial hypertension reveals novel gene expression and patient specificity. *Am. J. Respir. Crit. Care Med.* *195*, 930–941.
- Saunders, D.N., Hird, S.L., Withington, S.L., Dunwoodie, S.L., Henderson, M.J., Biben, C., Sutherland, R.L., Ormandy, C.J., and Watts, C.K. (2004). Edd, the murine hyperplastic disc gene, is essential for yolk sac vascularization and chorioallantoic fusion. *Mol. Cell. Biol.* *24*, 7225–7234.
- Schmidt, L., Wiedner, M., Velimezi, G., Prochazkova, J., Owusu, M., Bauer, S., and Loizou, J.I. (2014). ATMIN is required for the ATM-mediated signaling and recruitment of 53BP1 to DNA damage sites upon replication stress. *DNA Repair (Amst.)* *24*, 122–130.
- Schneider, C.A., Rasband, W.S., and Eliceiri, K.W. (2012). NIH Image to ImageJ: 25 years of image analysis. *Nat. Methods* *9*, 671–675.
- Smoot, M.E., Ono, K., Ruscheinski, J., Wang, P.L., and Ideker, T. (2011). Cytoscape 2.8: new features for data integration and network visualization. *Bioinformatics* *27*, 431–432.
- Swatek, K.N., and Komander, D. (2016). Ubiquitin modifications. *Cell Res.* *26*, 399–422.
- Vattulainen-Collanus, S., Akinrinade, O., Li, M., Koskenvuo, M., Li, C.G., Rao, S.P., de Jesus Perez, V., Yuan, K., Sawada, H., Koskenvuo, J.W., et al. (2016). Loss of PPAR $\gamma$  in endothelial cells leads to impaired angiogenesis. *J. Cell Sci.* *129*, 693–705.
- Vinayagam, A., Hu, Y., Kulkarni, M., Roesel, C., Sopko, R., Mohr, S.E., and Perrimon, N. (2013). Protein complex-based analysis framework for high-throughput data sets. *Sci. Signal.* *6*, rs5.
- Wiśniewski, J.R., Zougman, A., Nagaraj, N., and Mann, M. (2009). Universal sample preparation method for proteome analysis. *Nat. Methods* *6*, 359–362.
- Wu, J., Zhang, X., Zhang, L., Wu, C.Y., Rezaeian, A.H., Chan, C.H., Li, J.M., Wang, J., Gao, Y., Han, F., et al. (2012). Skp2 E3 ligase integrates ATM activation and homologous recombination repair by ubiquitinating NBS1. *Mol. Cell* *46*, 351–361.
- Yazdi, P.T., Wang, Y., Zhao, S., Patel, N., Lee, E.Y., and Qin, J. (2002). SMC1 is a downstream effector in the ATM/NBS1 branch of the human S-phase checkpoint. *Genes Dev.* *16*, 571–582.

Zhang, T., Penicud, K., Bruhn, C., Loizou, J.I., Kanu, N., Wang, Z.Q., and Behrens, A. (2012). Competition between NBS1 and ATMIN controls ATM signaling pathway choice. *Cell Rep.* 2, 1498–1504.

Zhang, T., Cronshaw, J., Kanu, N., Snijders, A.P., and Behrens, A. (2014). UBR5-mediated ubiquitination of ATMIN is required for ionizing radiation-

induced ATM signaling and function. *Proc. Natl. Acad. Sci. USA* 111, 12091–12096.

Ziv, Y., Bielopolski, D., Galanty, Y., Lukas, C., Taya, Y., Schultz, D.C., Lukas, J., Bekker-Jensen, S., Bartek, J., and Shiloh, Y. (2006). Chromatin relaxation in response to DNA double-strand breaks is modulated by a novel ATM- and KAP-1 dependent pathway. *Nat. Cell Biol.* 8, 870–876.



## STAR★METHODS

### KEY RESOURCES TABLE

| REAGENT or RESOURCE                                                                                                                 | SOURCE                        | IDENTIFIER                       |
|-------------------------------------------------------------------------------------------------------------------------------------|-------------------------------|----------------------------------|
| <b>Antibodies</b>                                                                                                                   |                               |                                  |
| Monoclonal ANTI-FLAG® M2 antibody                                                                                                   | Sigma-Aldrich                 | Cat#F1804, RRID:AB_262044        |
| Anti-Strep Tag antibody [GT661]                                                                                                     | Abcam                         | Cat#ab184224                     |
| Mre11 Antibody                                                                                                                      | Novus                         | Cat#NB100-142, RRID:AB_10077796  |
| Rad50 (13B3/2C6) antibody                                                                                                           | Santa Cruz Biotechnology      | Cat#sc-56209, RRID:AB_785402     |
| NBS1 Antibody                                                                                                                       | Novus                         | Cat#NB100-221, RRID:AB_10001212  |
| RXRalpha (D-20) antibody                                                                                                            | Santa Cruz Biotechnology      | Cat#sc-553, RRID:AB_2184874      |
| UBR5/EDD1 Antibody                                                                                                                  | Bethyl                        | Cat#A300-573A, RRID:AB_2210189   |
| Anti-ATM Protein Kinase pS1981 (MOUSE) Monoclonal Antibody                                                                          | Rockland                      | Cat#200-301-400, RRID:AB_217868  |
| ATM antibody                                                                                                                        | Abcam                         | Cat#ab2631, RRID:AB_2062948      |
| PPAR (D69) Antibody                                                                                                                 | Cell Signaling Technology     | Cat#2430, RRID:AB_823599         |
| Anti-ASCIZ/ATMIN antibody                                                                                                           | Millipore                     | Cat#AB3271, RRID:AB_2243333      |
| Phospho RPA32 (S4/S8) Antibody                                                                                                      | Bethyl                        | Cat#A300-245A, RRID:AB_210547    |
| RPA32 Antibody                                                                                                                      | Bethyl                        | Cat#A300-244A, RRID:AB_185548    |
| Phospho KAP-1 (S824) Antibody                                                                                                       | Bethyl                        | Cat# A300-767A, RRID:AB_669740   |
| KAP-1 Antibody                                                                                                                      | Bethyl                        | Cat#A303-838A, RRID:AB_2620189   |
| Phospho SMC1 (S966) Antibody                                                                                                        | Bethyl                        | Cat#A300-050A, RRID:AB_67578     |
| SMC1 Antibody                                                                                                                       | Bethyl                        | Cat#A303-834A, RRID:AB_2620185   |
| Mouse Anti-HA.11 Monoclonal Antibody, Unconjugated, Clone 16B12                                                                     | Covance Research Products Inc | Cat#MMS-101P-500, RRID:AB_291261 |
| Mouse Anti-Histone H2A.X, phospho (Ser139) Monoclonal antibody, Unconjugated, Clone jbw301                                          | Millipore                     | Cat#05-636, RRID:AB_309864       |
| H2AX Antibody                                                                                                                       | Bethyl                        | Cat#A300-083A, RRID:AB_203289    |
| Von Willebrand Factor antibody                                                                                                      | Abcam                         | Cat#ab6994, RRID:AB_305689       |
| PPARG / PPAR Gamma Antibody (phospho-Ser245/273)                                                                                    | LS Bio                        | Cat#LS-C209422                   |
| K48-linkage Specific Polyubiquitin Antibody                                                                                         | Cell Signaling Technology     | Cat#4289, RRID:AB_10557239       |
| Mouse Anti-8-oxo-dG Monoclonal Antibody, Unconjugated, Clone 200                                                                    | R and D Systems               | Cat#4354-MC-050, RRID:AB_1857195 |
| Lamin B1 (S-20) antibody                                                                                                            | Santa Cruz Biotechnology      | Cat#sc-30264, RRID:AB_2136305    |
| Mouse Anti-Glyceraldehyde-3-PDH (GAPDH) Monoclonal antibody, Unconjugated                                                           | Millipore                     | Cat#MAB374, RRID:AB_2107445      |
| Rat Anti-ORC2 Monoclonal Antibody, Unconjugated, Clone 3G6                                                                          | Cell Signaling Technology     | Cat#4736, RRID:AB_2157716        |
| Mouse Anti-alpha-Tubulin Monoclonal Antibody, Unconjugated, Clone B-5-1-2                                                           | Sigma-Aldrich                 | Cat#T6074, RRID:AB_477582        |
| Rabbit anti-Goat IgG (H+L) Secondary Antibody, HRP                                                                                  | Thermo Fisher Scientific      | Cat#81-1620, RRID:AB_2534006)    |
| Goat anti-Rat IgG (H+L) Secondary Antibody, HRP                                                                                     | Thermo Fisher Scientific      | Cat#31470, RRID:AB_228356        |
| Peroxidase-IgG Fraction Monoclonal Mouse Anti-Rabbit IgG, Light Chain Specific (min X Bov,Gt,Arm Hms,Hrs,Hu,Ms,Rat,Shp Ig) antibody | Jackson ImmunoResearch Labs   | Cat#211-032-171, RRID:AB_2339149 |
| Peroxidase-AffiniPure Goat Anti-Mouse IgG, Light Chain* Specific (min X Bov,Gt,Hrs,Hu,Rb,Rat,Shp Ig) antibody                       | Jackson ImmunoResearch Labs   | Cat#115-035-174, RRID:AB_2338512 |

(Continued on next page)

| <b>Continued</b>                                                                       |                                                                                                                                                                                           |                                |
|----------------------------------------------------------------------------------------|-------------------------------------------------------------------------------------------------------------------------------------------------------------------------------------------|--------------------------------|
| REAGENT or RESOURCE                                                                    | SOURCE                                                                                                                                                                                    | IDENTIFIER                     |
| Donkey anti-Mouse IgG (H+L) Highly Cross-Adsorbed Secondary Antibody, Alexa Fluor 488  | Thermo Fisher Scientific                                                                                                                                                                  | Cat#A-21202, RRID:AB_141607    |
| Donkey anti-Rabbit IgG (H+L) Highly Cross-Adsorbed Secondary Antibody, Alexa Fluor 594 | Thermo Fisher Scientific                                                                                                                                                                  | Cat#A-21207, RRID:AB_141637    |
| Biological Samples                                                                     |                                                                                                                                                                                           |                                |
| Human control and PAH patient specimens (tissues and cells)                            | The Pulmonary Hypertension Breakthrough Initiative (PHBI) Network                                                                                                                         | Table S5                       |
| Chemicals, Peptides, and Recombinant Proteins                                          |                                                                                                                                                                                           |                                |
| PolyJet <i>In Vitro</i> DNA Transfection Reagent                                       | SignaGen Laboratories                                                                                                                                                                     | Cat#SL100688                   |
| Lipofectamine RNAiMAX Transfection Reagent                                             | Thermo Fisher Scientific                                                                                                                                                                  | Cat#13778150                   |
| GW9662                                                                                 | Sigma-Aldrich                                                                                                                                                                             | Cat#M6191                      |
| SR10221                                                                                | Drs. Patrick Griffin, Theodore Kamenecka, Scripps Research Institute, Florida                                                                                                             | Marciano et al., 2015          |
|                                                                                        | Sigma-Aldrich                                                                                                                                                                             | Cat#D1515                      |
| HU                                                                                     | Sigma-Aldrich                                                                                                                                                                             | Cat#H8627                      |
| BS3 (bis(sulfosuccinimidyl)suberate)                                                   | Thermo Fisher Scientific                                                                                                                                                                  | Cat#21580                      |
| ChromPure Rabbit IgG, whole molecule                                                   | Jackson ImmunoResearch Labs                                                                                                                                                               | Cat#011-000-003                |
| ChromPure Rabbit IgG, whole molecule                                                   | Jackson ImmunoResearch Labs                                                                                                                                                               | Cat#015-000-003                |
| MG-132                                                                                 | Calbiochem                                                                                                                                                                                | Cat#474790                     |
| NEM (N-ethylmaleimide)                                                                 | Thermo Fisher Scientific                                                                                                                                                                  | Cat#23030                      |
| Flag Peptide                                                                           | Sigma-Aldrich                                                                                                                                                                             | Cat#F3290                      |
| Critical Commercial Assays                                                             |                                                                                                                                                                                           |                                |
| Click-iT EdU Alexa Fluor 647 Flow Cytometry Assay Kit                                  | Thermo Fisher Scientific                                                                                                                                                                  | <b>Cat#C10634</b>              |
| CometAssay Reagent Kit for Single Cell Gel Electrophoresis Assay                       | Trevigen                                                                                                                                                                                  | Cat#4250-050-K                 |
| P5 Primary Cell 4D-Nucleofector X Kit L                                                | Lonza                                                                                                                                                                                     | Cat#V4XP-5024                  |
| Deposited Data                                                                         |                                                                                                                                                                                           |                                |
| Raw mass spectrometry data                                                             | <a href="https://massive.ucsd.edu/ProteoSAFe/dataset.jsp?task=d597007ca8d7436587ccc4a7d4848842">https://massive.ucsd.edu/ProteoSAFe/dataset.jsp?task=d597007ca8d7436587ccc4a7d4848842</a> | Accession number: MSV000083257 |
| PPAR $\gamma$ and RXR $\alpha$ structure                                               | Chandra et al., 2008                                                                                                                                                                      | PDB ID: 3DZU                   |
| Experimental Models: Cell Lines                                                        |                                                                                                                                                                                           |                                |
| Human: 293T                                                                            | ATCC                                                                                                                                                                                      | Cat#CRL-3216                   |
| Human PAECs                                                                            | PromoCell                                                                                                                                                                                 | Cat#C-12241                    |
| <b>Human umbilical vein ECs</b>                                                        | Angio-Proteomie                                                                                                                                                                           | Cat#cAP-0001GFP                |
| Experimental Models: Organisms/Strains                                                 |                                                                                                                                                                                           |                                |
| Mouse: <i>Tie2-PPAR<math>\gamma</math><sup>-/-</sup></i> tissue specimens              | Guignabert et al., 2009                                                                                                                                                                   | Guignabert et al., 2009        |
| Oligonucleotides                                                                       |                                                                                                                                                                                           |                                |
| siRNA targeting sequence (pool): PPAR $\gamma$                                         | Dharmacon                                                                                                                                                                                 | Cat#L-003436-00-0005           |
| siRNA targeting sequence (#9): PPAR $\gamma$                                           | Dharmacon                                                                                                                                                                                 | Cat#J-003436-09-0005           |
| siRNA targeting sequence (pool): UBR5                                                  | Dharmacon                                                                                                                                                                                 | Cat#M-007189-02-0010           |
| siRNA targeting sequence (pool): ATMIN                                                 | Dharmacon                                                                                                                                                                                 | Cat#L-020304-01-0010           |
| siRNA targeting sequence (pool): NBS1                                                  | Dharmacon                                                                                                                                                                                 | Cat#M-009641-02-0005           |
| siRNA targeting sequence (pool): Non-targeting                                         | Dharmacon                                                                                                                                                                                 | Cat#D-001810-10                |
| Primers for quantitative real-time PCR and cloning                                     | This paper                                                                                                                                                                                | Table S6                       |
| Recombinant DNA                                                                        |                                                                                                                                                                                           |                                |
| Plasmid: pCMV2-Flag-PPAR $\gamma$ 1                                                    | This paper                                                                                                                                                                                | N/A                            |
| Plasmid: pCMV2-Flag-PPAR $\gamma$ 1-LBD                                                | This paper                                                                                                                                                                                | N/A                            |

(Continued on next page)

**Continued**

| REAGENT or RESOURCE                                                        | SOURCE                                                          | IDENTIFIER                                                                                                                                                                                |
|----------------------------------------------------------------------------|-----------------------------------------------------------------|-------------------------------------------------------------------------------------------------------------------------------------------------------------------------------------------|
| Plasmid: pcDNA-PPAR $\gamma$ 1-2xStrep                                     | This paper                                                      | N/A                                                                                                                                                                                       |
| Plasmid: pcDNA3-NBS1                                                       | Dr. Hui-Kuan Lin, University of Texas MD Anderson Cancer Center | <a href="#">Wu et al., 2012</a>                                                                                                                                                           |
| Plasmid: pCMV2-siRNA-resistant-Flag-PPAR $\gamma$ 1 (siRES-PPAR $\gamma$ ) | This paper                                                      | N/A                                                                                                                                                                                       |
| Plasmid: pCMVtag2B-Flag-ATMIN (1-354)                                      | Dr. Axel Behrens, King's College London                         | <a href="#">Zhang et al., 2014</a>                                                                                                                                                        |
| Plasmid: pCMV2-siRNA-resistant-Flag-PPAR $\gamma$ 1 (siRES-PPAR $\gamma$ ) | This paper                                                      | N/A                                                                                                                                                                                       |
| Plasmid: pcDNA-GFP-StrepFlag                                               | Dr. Nevan Krogan, UCSF                                          | N/A                                                                                                                                                                                       |
| Plasmid: HA-ubiquitin                                                      | Dr. Nevan Krogan, UCSF                                          | N/A                                                                                                                                                                                       |
| Software and Algorithms                                                    |                                                                 |                                                                                                                                                                                           |
| MaxQuant                                                                   | <a href="#">Cox and Mann, 2008</a>                              | <a href="http://www.coxdocs.org/doku.php?id=maxquant:common:download_and_installation#download">http://www.coxdocs.org/doku.php?id=maxquant:common:download_and_installation#download</a> |
| MSstats                                                                    | <a href="#">Choi et al., 2014b</a>                              | <a href="https://www.bioconductor.org/packages/release/bioc/html/MSstats.html">https://www.bioconductor.org/packages/release/bioc/html/MSstats.html</a>                                   |
| COMPLEAT                                                                   | <a href="#">Vinayagam et al., 2013</a>                          | <a href="http://www.flyrnai.org/compleat/">http://www.flyrnai.org/compleat/</a>                                                                                                           |
| Ingenuity Pathway Analysis                                                 | QIAGEN                                                          | <a href="https://www.qiagenbioinformatics.com/products/ingenuity-pathway-analysis/">https://www.qiagenbioinformatics.com/products/ingenuity-pathway-analysis/</a>                         |
| Cytoscape                                                                  | <a href="#">Smoot et al., 2011</a>                              | <a href="https://cytoscape.org/">https://cytoscape.org/</a>                                                                                                                               |
| Byonic                                                                     | Protein Metrics                                                 | <a href="https://www.proteinmetrics.com/products/byonic/">https://www.proteinmetrics.com/products/byonic/</a>                                                                             |
| Byologic                                                                   | Protein Metrics                                                 | <a href="https://www.proteinmetrics.com/products/byologic/">https://www.proteinmetrics.com/products/byologic/</a>                                                                         |
| PyMOL Molecular Graphical System                                           | Schrödinger, LCC                                                | <a href="https://pymol.org/2/">https://pymol.org/2/</a>                                                                                                                                   |
| ImageJ                                                                     | NIH                                                             | <a href="https://imagej.nih.gov/ij/">https://imagej.nih.gov/ij/</a>                                                                                                                       |
| Comet Assay Plugin for ImageJ                                              | Dr. Robert Bagnell, University of North Carolina                | <a href="https://www.med.unc.edu/microscopy/resources/imagej-plugins-and-macros/comet-assay">https://www.med.unc.edu/microscopy/resources/imagej-plugins-and-macros/comet-assay</a>       |
| GraphPad Prism                                                             | GraphPad Software                                               | <a href="https://www.graphpad.com/scientific-software/prism/">https://www.graphpad.com/scientific-software/prism/</a>                                                                     |

**CONTACT FOR REAGENT AND RESOURCE SHARING**

Further information and requests for reagents should be directed to and will be fulfilled by the Lead Contact, Marlene Rabinovitch ([marlener@stanford.edu](mailto:marlener@stanford.edu)).

**EXPERIMENTAL MODEL AND SUBJECT DETAILS**

**Cell culture**

293T cells (ATCC) were maintained in Dulbecco's Modified Eagle's Medium (DMEM, GIBCO) supplemented with 10% fetal bovine serum (FBS, GIBCO) and penicillin/streptomycin (GIBCO). Commercially available primary human PAECs (PromoCell) and umbilical vein ECs (HUVEC) (Angio-Proteomie) were cultured in complete EC medium (ScienCell). Primary human PAEC were purified from explanted lungs of patients undergoing transplantation due to PAH, or from controls (unused donors) obtained with approval from the Pulmonary Hypertension Breakthrough Initiative (PHBI) Network (see [Acknowledgments](#)). The PAEC were isolated by scraping the endothelial layer of pulmonary arteries and cultured in complete EC medium. Once PAEC cultures were established from explanted lungs, EC were further purified by incubating the cell suspension in complete EC medium with CD31 Dynabeads (Thermo Fisher Scientific) for 10 min at room temperature, followed by three washes in phosphate-buffered saline (PBS, GIBCO), resuspended and re-cultured in complete EC medium. Demographic information for patient and control (unused donor) lungs is provided in [Table S5](#). In this study, PAEC isolated from small (< 1 mm) and large pulmonary arteries were used between passages 4-8 with similar distribution when comparing controls and PAH. All cultures were tested negative for mycoplasma contamination. Further details can be found in [Supplemental Information](#).

## METHOD DETAILS

### siRNAs

ON-TARGETplus SMARTpool siRNA targeting PPAR $\gamma$  (L-003436-00-0005; Dharmacon) was used to deplete PPAR $\gamma$  for all experiments. For verifying  $\gamma$ H2AX suppression, individual siRNA of the pool were used (#7, J-003436-07-0005; #8, J-003436-08-0005; #9, J-003436-09-0005, Dharmacon). For depleting UBR5, we used siGENOME SMARTpool siRNA targeting UBR5 (M-007189-02-0010, Dharmacon). For depleting ATMIN, we used ON-TARGETplus SMARTpool siRNA targeting ATMIN (L-020304-01-0010, Dharmacon). ON-TARGETplus non-targeting pool (D-001810-10-05, Dharmacon) was used for all siControl transfections.

### Plasmids

An amino-terminal Flag tagged-PPAR $\gamma$ 1 (courtesy of Dr. László Nagy, University of Debrecen, Hungary) was mutagenized to achieve 100% identity to the published sequence (NM\_005037) using site-directed mutagenesis via a quick-change PCR (QC-PCR) protocol. Deletion of the PPAR $\gamma$  LBD was generated using the QC-PCR protocol. Flag-PPAR $\gamma$  plasmids were amplified using PfuUltra (Agilent) and primers that introduce a stop codon to delete PPAR $\gamma$  LBD (Table S6). Products were DpnI (NEB) digested then transformed into One Shot TOP10 cells (Thermo Fisher Scientific). For generating the carboxyl-terminal 2xStrep tagged-PPAR $\gamma$ , the PPAR $\gamma$  open reading frame was amplified with primers to create EcoRI and NotI flanking sites (Table S6). PCR product was inserted into the pcDNA 2xStrep vector following the In-Fusion HD Cloning Kit protocol (Clontech). For generating the Flag-PPAR $\gamma$  siRNA resistant construct, primers were used to generate three silent mutations in the PPAR $\gamma$  siRNA#9 targeted region: GACAGCGACTTGGCAATAT (Table S6). The silent mutations introduced are underlined: GACAGCGATCTCGCAATAT. The carboxyl-terminal StrepFlag-tagged GFP, 2xStrep pcDNA plasmids and the amino-terminal HA-tagged ubiquitin were kindly provided to us by Dr. Nevan Krogan, UCSF. The amino-terminal Flag tagged-NBS1 was kindly provided by Dr. Hui-Kuan Lin, University of Texas MD Anderson Cancer Center. The amino-terminal Flag tagged-ATMIN (amino acids 1-354) was kindly provided by Dr. Axel Behrens, King's College London. pCMV2-Flag (Sigma) was used as vector control.

### Transient transfections

Plasmids were transfected into 293T cells using PolyJet at 3:1 (polyjet:DNA) according to the manufacturer's instructions (SignaGen Laboratories). siRNAs were transfected into 293T using Lipofectamine RNAiMAX (Invitrogen). In primary PAEC, siRNAs or plasmid DNA were transfected using P5 Primary Cell 4D-Nucleofector X Kit (Lonza) according to manufacturer's instructions (Lonza).

### Nuclear extraction

Cells were washed and scraped in ice-cold Tris-buffered saline (TBS, Corning). Cell pellets were resuspended in hypotonic buffer [10 mM HEPES, pH 7.9, 10 mM KCl, 1.5 mM MgCl<sub>2</sub>, Halt protease and phosphatase inhibitor (Thermo Scientific)], and homogenized 10 times using a dounce homogenizer (pestle B) (Kimble Chase). The nuclei were then pelleted by centrifugation at 13,000 rpm at 4°C for 5 min, and lysed in high salt buffer [20 mM HEPES, pH 7.9, 0.42 M NaCl, 25% glycerol, 5 mM CaCl<sub>2</sub>, 1.5 mM MgCl<sub>2</sub>, 0.1% Nonidet P-40 (NP-40), 0.2 mM EDTA, Halt protease and phosphatase inhibitor]. Lysates were homogenized 20 times using a dounce homogenizer (pestle B), and incubated with micrococcal nuclease (Thermo Scientific) at room temperature for 15 min to further digest chromatin. Nuclear extracts were collected by centrifugation at 14,000 rpm at 4°C for 20 min. For immunoprecipitation, lysates were diluted with 3x volumes of low detergent buffer (20 mM HEPES, pH 7.9, 1 mM EDTA, 0.2% NP-40, Halt protease and phosphatase inhibitor).

### Whole cell extraction

For whole-cell extract for immunoprecipitation, cells were washed in ice-cold TBS, lysed in 0.2% NP-40 buffer (50 mM Tris-HCl, pH 8.0, 150 mM NaCl, 5 mM CaCl<sub>2</sub>, 1 mM EDTA, 0.2% NP-40, Halt protease and phosphatase inhibitor), and incubated on ice for 15 min. Lysates were homogenized 20 times using a dounce homogenizer (pestle B), and incubated with micrococcal nuclease as described above. Cell extracts were collected by centrifugation at 14,000 rpm at 4°C for 20 min. For protein analyses, cells were washed in ice-cold TBS, and lysed in RIPA buffer (50 mM Tris-HCl, pH 8.0, 150 mM NaCl, 5 mM CaCl<sub>2</sub>, 1% NP-40, 0.5% sodium deoxycholate, 0.1% SDS, Halt protease and phosphatase inhibitor). Cell extracts were incubated with micrococcal nuclease at room temperature for 15 min, and collected as described above.

### Immunoprecipitation

Diluted nuclear extracts or undiluted whole cell extracts were incubated with antibodies overnight at 4°C with rotation. The next day, Protein-G Dynabeads (Thermo Fisher Scientific) were added to cell extracts containing antibodies, and incubated for 3 h at 4°C with rotation. After incubation, beads were washed three times in ice-cold wash buffer (50 mM Tris-HCl, pH 7.5, 150 mM NaCl, 1 mM EDTA, 0.05% NP-40). Proteins were eluted in acid using IgG elution buffer (Thermo Scientific) at room temperature for 10 min on gentle vortex. The final elution was collected and neutralized with 1/10 volume of 1 M Tris-HCl, pH 9.0.



### Denaturing immunoprecipitation

293T cells were preincubated with MG132 (10  $\mu$ M) for 2 hours. Cells were then washed in ice-cold TBS containing N-ethylmaleimide (10 mM, Thermo Fisher Scientific). Cells were immediately lysed in boiled 1% SDS buffer (50 mM Tris-HCl, pH 8.0 and 1% SDS), and incubated at 95°C for 20 min. Cell extracts were collected by centrifugation at 14,000 rpm for 20 min. Cell extracts were diluted with 3x volumes of dilution buffer (50 mM Tris-HCl, pH 8.0, 150 mM NaCl, Halt protease and phosphatase inhibitor), and proceeded with immunoprecipitation protocol described above. Proteins were eluted by incubating beads in 2x Laemmli sample buffer (Bio-Rad) containing TCEP, at 95°C for 10 min.

### Immunoblotting

Equal amounts of proteins, measured by BCA assay (Thermo Scientific), were mixed with sample buffers (NuPAGE LDS Sample Buffer, Thermo Fisher Scientific; Laemmli Protein Sample Buffer, Bio-Rad) containing TCEP (Pierce) and were separated by SDS-PAGE on 4%–12% Bis-Tris gels (Thermo Fisher Scientific) for 15–70 kDa proteins or 4%–20% Tris-Glycine gels (Bio-Rad) for 30–350 kDa proteins and transferred onto PVDF membranes (Bio-Rad) using the wet transfer system (Bio-Rad). Bis-Tris gels were transferred in NuPAGE transfer buffer (Novex) containing 20% methanol. Tris-Glycine gels were transferred in Tris-Glycine buffer containing 5% methanol and 0.01% SDS. Membranes were blocked with 5% bovine serum albumin (BSA; Research Products International) in TBST (0.1% (v/v) Tween-20) at room temperature for 1 h. Primary antibody incubations were carried out in the blocking buffer at 4°C overnight, and secondary antibody incubations in the blocking buffer at room temperature for 2 h. Proteins were visualized with Amersham ECL Western Blotting Detection Reagent (GE), Clarity ECL Western Blotting Substrate (Bio-Rad) or SuperSignal West Femto Maximum Sensitivity Substrate (Thermo Scientific) and imaged using Image Lab software (Bio-Rad) on ChemiDoc XRS System (Bio-Rad).

### Size-exclusion chromatography

Nuclear extracts were collected and diluted as described for immunoprecipitation. Lysates were incubated overnight at 4°C and centrifuged through a 0.45  $\mu$ m Ultrafree-MC HV Centrifugal Filter (UFC30HVNB, EMD Millipore) before being applied to a pre-equilibrated Superose 6 10/300 GL column (17-5172-01, GE Healthcare Life Sciences). Fractions were collected and separated by SDS-PAGE on 4%–20% Tris-Glycine gels. The Superose 6 standard curve supplied by manufacturer was used to estimate molecular weight range for the collected fractions.

### RNA extraction and quantitative PCR

Total RNA was extracted and purified from cells using the Quick-RNA MiniPrep Kit (Zymo Research, Irvine, CA). Equal amounts of RNA were reverse transcribed using High Capacity RNA to cDNA Kit (Applied Biosystems, Foster City, CA) according to the manufacturer's instructions. Real-time PCR reactions were prepared with PowerUp SYBR Green Master Mix (Applied Biosystems, Foster City, CA). mRNA levels were normalized to the house-keeping gene,  $\beta$ -actin.

### Immunoprecipitation for mass spectrometry analyses

For AP-MS, cell extracts were pre-cleared with Protein-G Dynabeads for 1 h at 4°C before primary antibody incubation. For TAP-MS, whole cell extracts were incubated with Strep-Tactin Sepharose (IBA) at 4°C overnight. Cell extracts were washed three times in wash buffer and incubated in 1x Strep-tag elution buffer (IBA) for 10 min at room temperature on gentle vortex. The eluted solution was diluted with five times wash buffer and incubated with EZview red Flag M2 affinity gel (Sigma) for 4 h at 4°C. Beads were washed three times and eluted in wash buffer containing 150  $\mu$ g/mL Flag peptide (Sigma) for 30 min at room temperature on gentle vortex.

### Mass spectrometry

MS sample preparation and analyses were performed by the Stanford University Mass Spectrometry facility. In brief, for gel-free MS analysis, the final elutions from immunoprecipitations were solubilized and digested using the filter aided sample preparation (FASP) protocol (Wiśniewski et al., 2009). For gel-based analysis, final elutions were separated by 4%–20% SDS-PAGE (Bio-Rad) followed by silver staining (Thermo Scientific). Gel fragments were excised and cut into 1 mm<sup>3</sup> cubes, reduced with 5 mM DTT and alkylated with acrylamide. Trypsin/Lys-C Mix (Promega) was used as the protease for protein digestion. Peptides were extracted and dried using a speed-vac prior to reconstitution and analysis.

Nano reverse-phase HPLC was performed using either an Eksigent 2D nanoLC (Eksigent) or Waters nanoAcquity (Waters) with mobile phase A consisting of 0.1% formic acid in water and mobile phase B consisting of 0.1% formic acid in acetonitrile. A fused silica column self packed with duragel. C18 (Peeke) matrix was used with a linear gradient from 2% B to 40% B at a flow rate of 600 nL/minute. The nanoHPLC was interfaced with a Bruker/Michrom Advance Captive spray source for nanoESI into either a LTQ Orbitrap Velos mass spectrometer (Thermo Fisher Scientific) or an Orbitrap Elite (Thermo Fisher Scientific) operating in data-dependent acquisition mode to perform MS/MS on the top twelve most intense multiply charged cations.

### Statistical analysis for AP-MS and TAP-MS

PPAR $\gamma$  AP-MS RAW data were searched with MaxQuant v. 1.5.0 (Cox and Mann, 2008) using default options, enabling matching between runs, against the reviewed version of the human reference proteome (07/30/2013). Then, the MS-1 peak intensities were

Log<sub>2</sub>-transformed and their distributions were median-centered across all runs. Missing intensities for peptides in a given run were imputed by setting their value to the mean minimal intensity across all runs, as an estimate for the under limit of detectability by MS. The normalized dataset was then analyzed by fitting a mixed effects model per protein in MSstats (v. 2.3.4, available on msstats.org) (Choi et al., 2014b) using the model without interaction terms, unequal feature variance and restricted scope of technical and biological replication. Pathway analyses were performed using COMPLEAT (Vinayagam et al., 2013) and Ingenuity Pathway Analysis (QIAGEN) and further curated manually based on published literature. Finally, known interactions between the 47 high confidence interactors of the DDR and replication pathway were computed by mining the COMPLEAT dataset and represented using Cytoscape (v.2.8.3) (Smoot et al., 2011).

For analysis of potential crosslinked peptides, data were searched using Byonic v3.1.0 (Protein Metrics), allowing for crosslinks between PPAR $\gamma$  and NBS1, assuming that peptides were tryptic with up to two missed cleavages and linked by BS3. The resulting spectral assignments were further analyzed using Byologic v3.2-38 (Protein Metrics) to identify and qualitatively assess crosslinked spectra at a chromatographic, MS1, and MS/MS level as described previously (<https://www.ncbi.nlm.nih.gov/pubmed/28431242>). Following this qualitative assessment, potential crosslinked peptides were compared against structural constraints based on the crystallography source PDB ID: 3DZU (Chandra et al., 2008) using the PyMOL Molecular Graphics System v.2.2.2 (Schrödinger, LLC).

### EdU incorporation assay for cell cycle analysis

Cell cycle analysis was performed using the Click-iT EdU Alexa Fluor 647 Flow Cytometry Assay Kit (Thermo Fisher Scientific) according to the manufacturer's protocol. EdU (5-ethynyl-2'-deoxyuridine, 10  $\mu$ M) was added to cells 2 h before harvest. Cells were co-stained with propidium iodide to quantitate DNA content.

### Alkaline comet assay

DNA breaks were monitored using the CometAssay Reagent Kit for Single Cell Gel Electrophoresis Assay (Trevigen) according to the manufacturer's protocol. DNA was stained with SYBR-gold (Thermo Fisher Scientific). The comet tail lengths (defined as the length from the center of the DNA head to the end of the DNA tail) were measured by counting 100-150 cells for each sample and analyzed using ImageJ (v. 2.0) with a Comet Assay Plugin, downloaded from <https://www.med.unc.edu/microscopy/resources/imagej-plugins-and-macos/comet-assay>. The box in box-and-whiskers plots corresponds to the 25th to 75th percentiles. The line in the box marks the median and whiskers correspond to the 10th to 90th percentiles. Data points represent average comet tail length per sample. The outliers are represented as dots outside the whiskers.

### Hypoxia and Reoxygenation

Cells were seeded on coverslips overnight and transferred to a Baker Ruskin Concept anaerobic (< 0.1% O<sub>2</sub>) chamber. Cells were incubated for 24 hours before exposing to room air for 10 min to induce oxidative damage. Cells were fixed according to the immunofluorescence protocol.

### Immunofluorescence staining and confocal microscopy

After staining cultured cells, to avoid bias coverslips were randomly assigned with a number. The investigator was blinded to the randomization during data acquisition and analyses. Cultured cells were seeded on coverslips pre-coated with mouse Collagen IV (Corning). For staining of pATM (S1981), pRPA2 (S4/8),  $\gamma$ H2AX and 8-oxo-dG foci, cells were pre-extracted with ice-cold 0.25% Triton in TBS at 4°C for 10 min with gentle rocking. Cells were then washed in TBS and fixed with 4% paraformaldehyde (Electron Microscopy Sciences) at room temperature for 10 min. After fixation, cells were blocked with 3% BSA in TBST at room temperature for 1 h. Primary antibody incubations were carried out in the blocking buffer at 4°C overnight, and secondary antibody incubations in the blocking buffer at room temperature for 1 h. Cells were mounted with DAPI Fluoromount-G (DAPI, 4,6-diamidino-2-phenylindole) (SouthernBiotech). Stained cells were imaged using Leica Application Suite X software on a Leica CTR 6500 (Leica).

For staining lung tissue sections, the genotypes of the lung sections were blinded to the investigator before the staining procedures were carried out, and during the data acquisition. Lungs tissues were fixed with 10% Neutral Buffered Formalin (Thermo Scientific) and embedded in paraffin (Leica). Sections were first deparaffinized and rehydrated. For antigen retrieval, sections were incubated in sub-boiling buffer (0.25 mM EDTA, pH 8.0) for 50 min. After cooling to room temperature, sections were incubated in 3% H<sub>2</sub>O<sub>2</sub> for 10 min. Sections were incubated with the blocking buffer [3% normal goat serum (Jackson ImmunoResearch), 2% BSA, 0.2% Triton] at room temperature for 1 h. Primary antibody incubation was then carried out at 4°C overnight, followed by secondary antibody incubation at room temperature for 1 h. Sections were mounted with VECTASHIELD Antifade Mounting Medium with DAPI (Vector Laboratories). Stained lung sections were imaged using the FV10-ASW4.3 software on a Fluoview 1000 confocal microscope.

### Immunofluorescence image analyses

For pATM (S1981), pRPA2 (S4/8),  $\gamma$ H2AX and 8-oxo-dG imaging, 1-3 fields were acquired with the 20X objective to obtain 100-150 cells per sample. Nuclear fluorescence intensities were measured using ImageJ (Schneider et al., 2012), and box-and-whiskers graphs generated as described above. Each data point represents nuclear fluorescence per cell. Each graph is representative of one out of three independent experiments.

For evaluating  $\gamma$ H2AX in mouse lung sections, 7 - 11 arteries (based on vWF staining and location) per animal (5 animals per group) were imaged. For evaluating  $\gamma$ H2AX in clinical lung sections, 3 - 6 arteries (based on vWF staining and location) per subject were imaged (control: 6 and PAH: 5 subjects). Z stacked images were acquired with the 60X and 40X objectives for the mouse and human samples respectively. Nuclear  $\gamma$ H2AX fluorescence was measured using the FociCounter software. The box-and-whiskers plots were generated as described above. Each data point represents average nuclear  $\gamma$ H2AX fluorescence (after normalization to cell number) per artery. Details can be found in [Supplemental Information](#).

### QUANTIFICATION AND STATISTICAL ANALYSIS

Statistical analyses were performed using GraphPad Prism 6.0 (GraphPad Software). Experimental data were first subjected to the Shapiro-Wilk normality test to determine if the data are of a Gaussian distribution. The following tests were then selected for further statistical analyses. For pairwise comparison, unpaired t test (parametric) or two-tailed Mann-Whitney test (nonparametric) was used. For one-way ANOVA, Fisher's LSD test was used for pairwise comparison. For two-way ANOVA, Fisher's LSD test was used for pairwise comparison. For comparing immunofluorescence signals in more than two groups, Kruskal-Wallis ANOVA test followed by Dunn's test was used. P values are indicated as \*,  $p < 0.05$ ; \*\*,  $p < 0.01$ ; \*\*\*,  $p < 0.001$ ; \*\*\*\*,  $p < 0.0001$ .

### DATA AND SOFTWARE AVAILABILITY

The accession number for the mass spectrometry data generated from this study is Mass Spectrometry Interactive Virtual Environment (MassIVE) database: MSV000083257.

**Supplemental Information**

**PPAR $\gamma$  Interaction with UBR5/ATMIN**

**Promotes DNA Repair**

**to Maintain Endothelial Homeostasis**

**Caiyun G. Li, Cathal Mahon, Nathaly M. Sweeney, Erik Verschueren, Vivek Kantamani, Dan Li, Jan K. Hennigs, David P. Marciano, Isabel Diebold, Ossama Abu-Halawa, Matthew Elliott, Silin Sa, Feng Guo, Lingli Wang, Aiqin Cao, Christophe Guignabert, Julie Sollier, Nils P. Nickel, Mark Kaschwich, Karlene A. Cimprich, and Marlene Rabinovitch**



1 **Supplementary Information**  
 2 **Figure S1**

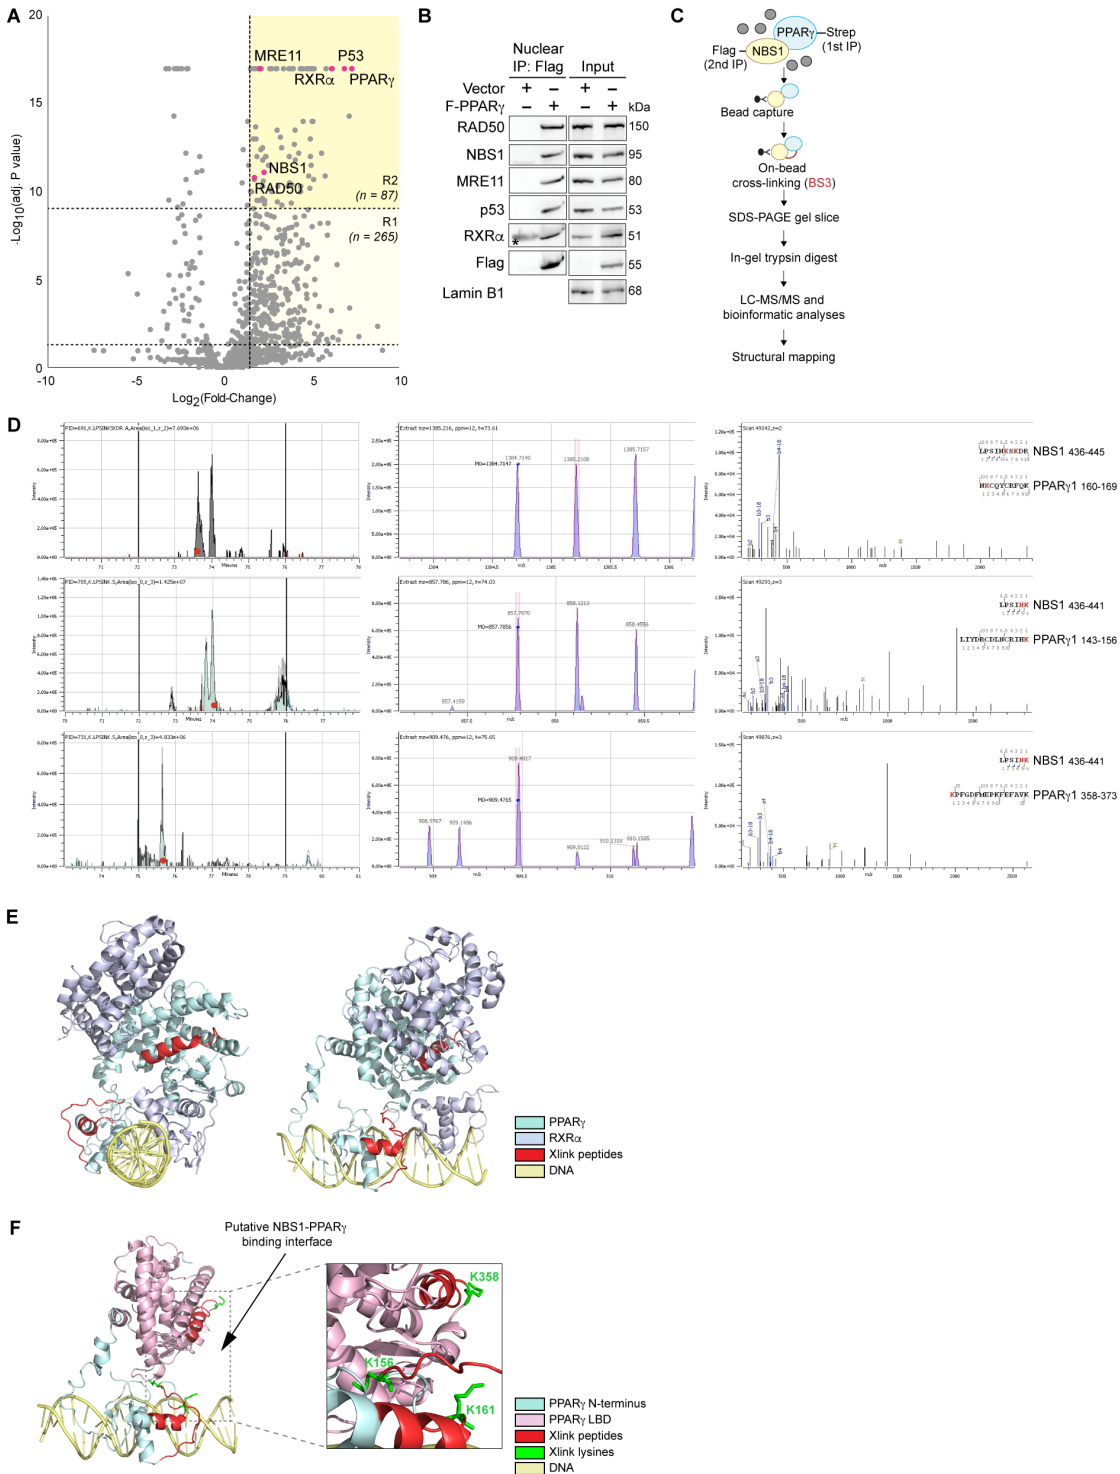

3 **Figure S1 PPAR $\gamma$  interacts with the MRE11-RAD50-NBS1 (MRN) complex via NBS1 in 293T cells. – Related**  
 4 **to Figure 1, Table S1-2.**

5 (A) AP-MS experiments yielded a volcano plot revealing 87 PPAR $\gamma$  high confidence interactors (R2) out of the 352  
 6 interactors (R1+R2). Four (in red) were validated in (C) Dotted lines represent cut-off at  $\text{Log}_2(\text{Fold-Change}) > 1.5$   
 7 and  $\text{Log}_{10}(\text{adj. P value}) \leq 0.05$  and  $1.0 \times 10^{-9}$ ). R1, region 1; R2, region 2, described in Results.  
 8

9 (B) Representative immunoblots of PPAR $\gamma$  interactions in 293T nuclear extracts.  
10 (C) Experimental set up of the BS3 crosslinking mass spectrometry (XL-MS) using tandem immunoprecipitation of  
11 Flag-NBS1 and PPAR $\gamma$ -Strep to determine NBS1 and PPAR $\gamma$  binding interface.  
12 (D) Raw MS/MS data of the identified crosslinked peptides from BS3 treated beads and trypsin-digested NBS1 and  
13 PPAR $\gamma$ . Amino acid positions of the peptides are as indicated. Analyses and methods are described in experimental  
14 procedures.  
15 (E) Structural mapping of the three PPAR $\gamma$  peptides (red) identified in (D) to PPAR $\gamma$  crystal structure (light green)  
16 obtained from PDB:3DZU. This structure depicts PPAR $\gamma$  and RXR $\alpha$  (blue) complex on DNA (yellow).  
17 (F) Putative NBS1-PPAR $\gamma$  binding interface as indicated by the locations of the three Xlink peptides (red). The  
18 Xlink lysines (K) are labeled as green in inset. PPAR $\gamma$  N-terminus is in light green, and its ligand-binding domain  
19 (LBD) is in pink.  
20  
21  
22  
23  
24  
25

26 **Figure S2**

**A**

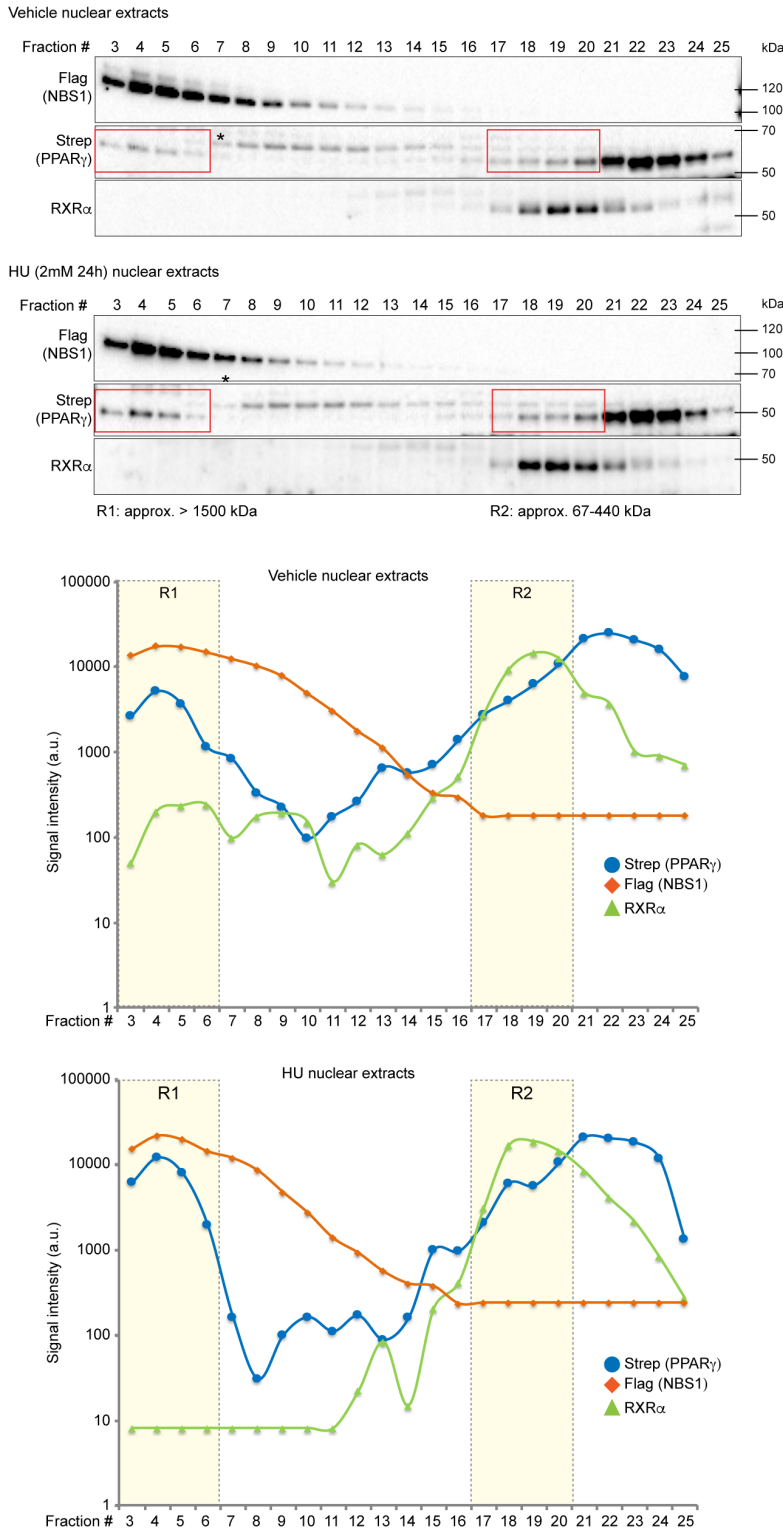

**B**

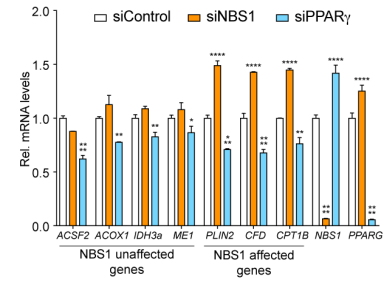

**C**

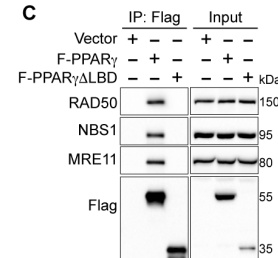

**D**

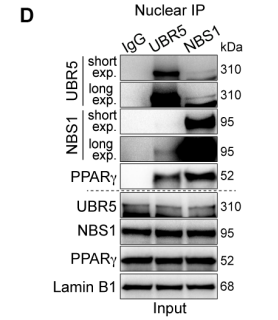

**E**

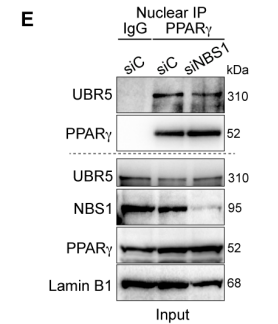

27  
28  
29

**Figure S2 Nuclear PPAR $\gamma$  and NBS1 are in an independent cellular pool from PPAR $\gamma$  and RXR $\alpha$ . – Related to Figure 1.**

30 (A) 293T nuclear extracts expressing PPAR $\gamma$ -2xStrep and Flag-NBS1 with and without HU treatment were analyzed  
31 by size-exclusion chromatography on a Superose 6 gel filtration column. Proteins eluted from fractions #3-25 were  
32 further analyzed by immunoblots to detect PPAR $\gamma$  (anti-Strep), NBS1 (ant-Flag) and RXR $\alpha$  (anti-RXR $\alpha$ ). Graphs  
33 indicate densitometry results of each protein. Region 1 and 2 (R1, R2) are highlighted in red (in immunoblots) and  
34 yellow (in graphs) to indicate PPAR $\gamma$  eluted fractions. Since PPAR $\gamma$ -2xStrep is approximately (approx.) a 60 kDa  
35 protein (analyzed by silver staining in Fig. 1e), PPAR $\gamma$  eluted from fraction #21 (approx. 67 kDa) might be the  
36 excess monomeric form (due to overexpression). \* indicates non-specific band.

37 (B) mRNA expression of PPAR $\gamma$  target genes with NBS1 or PPAR $\gamma$  depletion. mRNA expression was normalized to  
38  *$\beta$ -actin* mRNA.

39 (C) Representative immunoblots of interactions between Flag-PPAR $\gamma$  (F-PPAR $\gamma$ ) without the ligand binding domain  
40 ( $\Delta$ LBD) and MRN.

41 (E) Representative immunoblots of endogenous co-immunoprecipitation (co-IP) between nuclear UBR5, NBS1 and  
42 PPAR $\gamma$  using anti-UBR5 or anti-NBS1.

43 (F) Representative immunoblots of endogenous IP of PPAR $\gamma$  with UBR5 with NBS1 depletion (siNBS1).

44 Error bars, mean  $\pm$  s.e.m. (B). siC, siControl. Two-way ANOVA test with Fisher's LSD test (B). \*, P < 0.05, \*\*, P <  
45 0.01, \*\*\*, P < 0.001, \*\*\*\*, P < 0.0001.

46

47 siC, siControl, siP $\gamma$ , siPPAR $\gamma$ , siU5, siUBR5. Error bars, mean  $\pm$  s.e.m. (B). siC, siControl. Two-way ANOVA test  
48 with Fisher's LSD test (A-C). One-way ANOVA test with Fisher's LSD test (G). \*, P < 0.05, \*\*, P < 0.01, \*\*\*, P <  
49 0.001, \*\*\*\*, P < 0.0001.

50 **Figure S3**

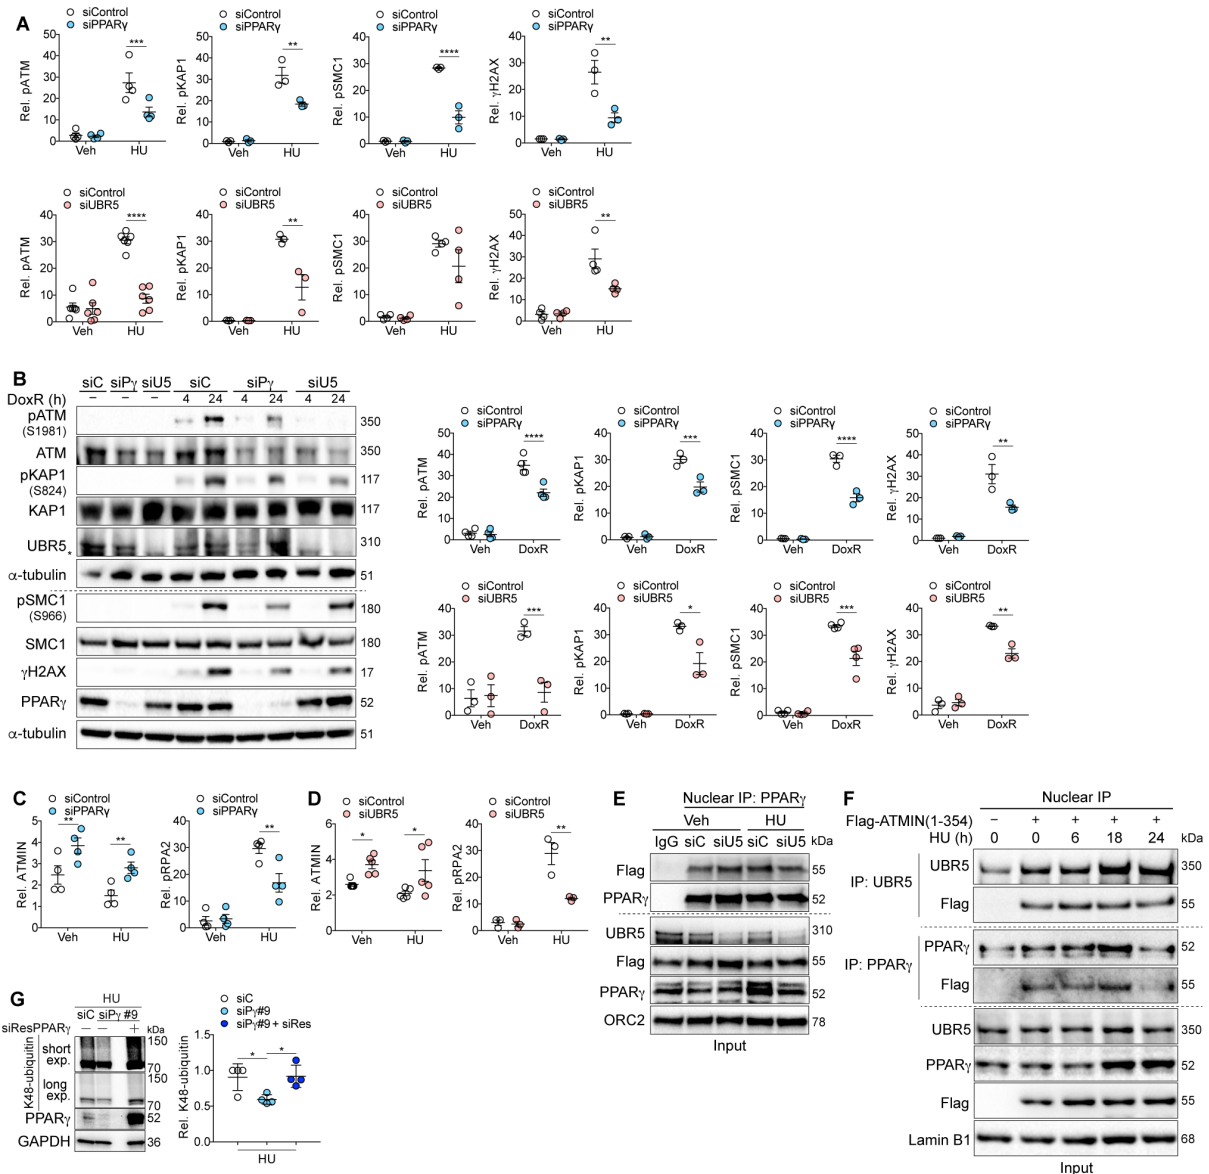

51  
 52 **Figure S3 PPAR $\gamma$  promotes ATM signaling by increasing ATMIN ubiquitination in 293T cells. – Related to**  
 53 **Figure 2.**  
 54 (A) Densitometry of HU-induced ATM signaling pathways, pATM, pKAP1, pSMC1,  $\gamma$ H2AX levels with PPAR $\gamma$  or  
 55 UBR5 depletion.  
 56 (B) Representative immunoblots and densitometry data of DoxR-induced ATM signaling pathways, pATM, pKAP1,  
 57 pSMC1,  $\gamma$ H2AX levels with PPAR $\gamma$  or UBR5 depletions.  
 58 (C) Densitometry data of HU-induced ATMIN and pRPA2 with PPAR $\gamma$  depletion.  
 59 (D) Densitometry data of HU-induced ATMIN and pRPA2 with UBR5 depletion.  
 60 (E) Representative immunoblots of endogenous IP of nuclear PPAR $\gamma$  with Flag-ATMIN (aa1-354) with UBR5  
 61 depletion.  
 62 (F) Representative immunoblots of endogenous IP of nuclear PPAR $\gamma$  or UBR5 with Flag-ATMIN (aa1-354) with  
 63 HU. The samples were harvested at the indicated time after HU treatment and lysates were separately incubated with  
 64 anti-PPAR $\gamma$  or anti-UBR5.  
 65 (G) Representative immunoblots and densitometry data of restoration of K48-linked polyubiquitins with siRNA  
 66 (siPPAR $\gamma$ #9)-resistant PPAR $\gamma$  overexpression.



67 **Figure S4**

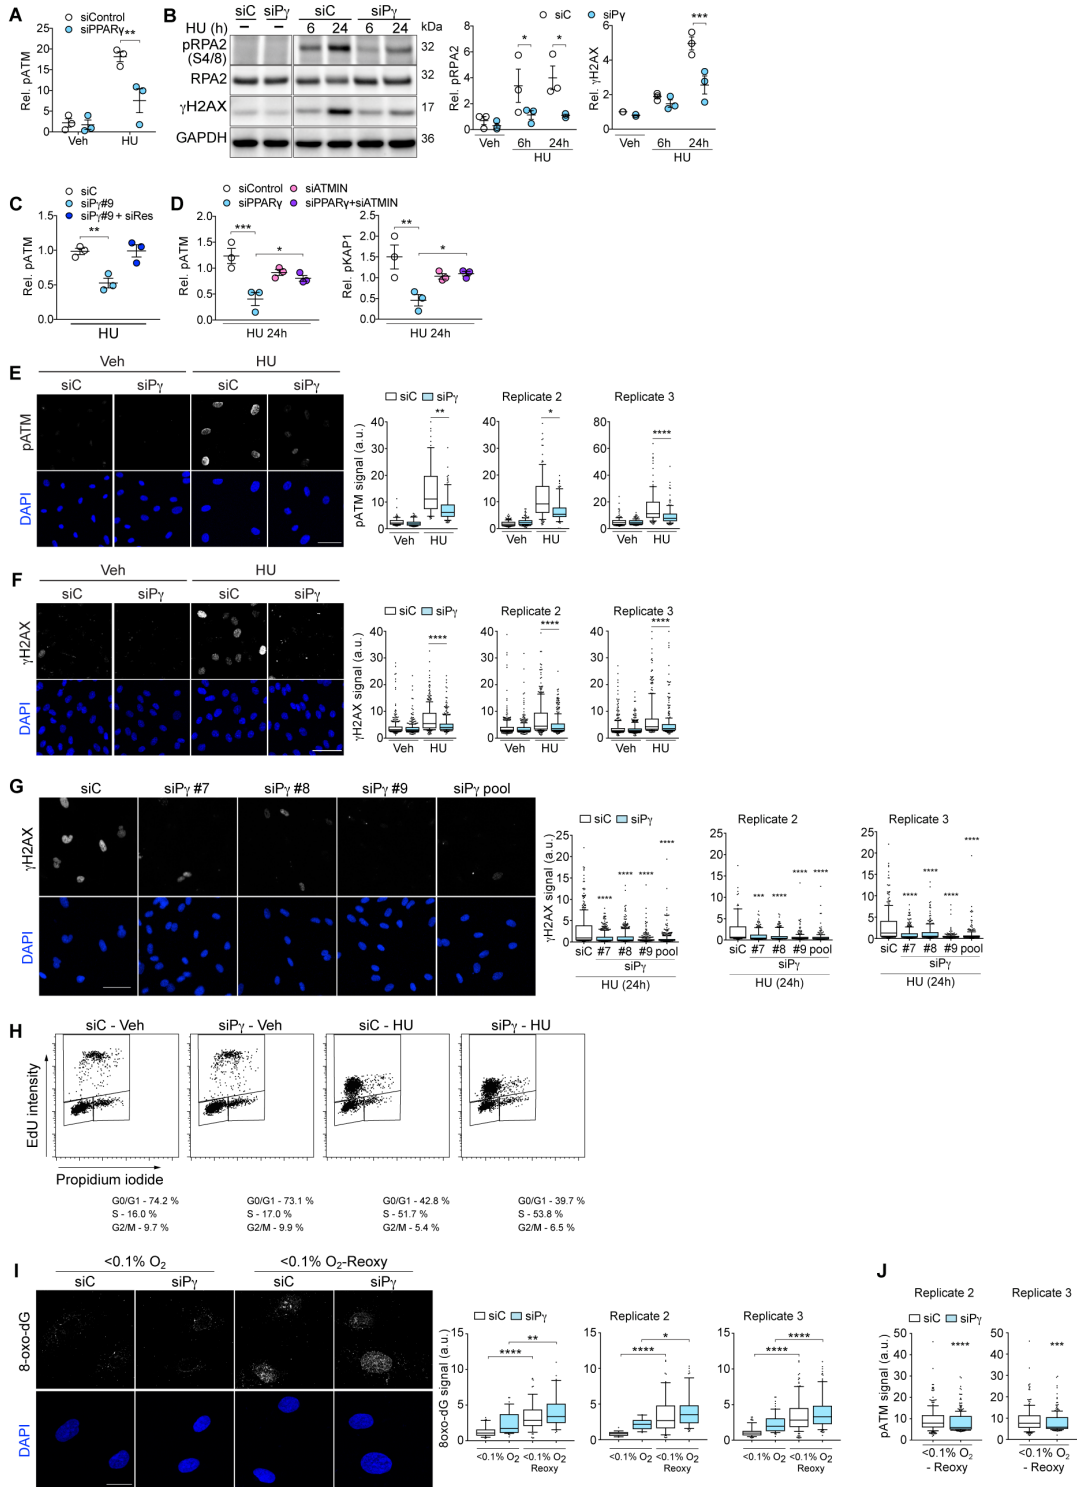

68 **Fig. S4 PPAR $\gamma$  depletion suppresses pATM and  $\gamma$ H2AX foci formation with various DNA damage stimuli and**  
 69 **has no effects on cell cycle in primary endothelial cells. – Related to Figure 3.**  
 70

71 (A) Densitometry data of HU-induced pATM with PPAR $\gamma$  depletion in PAEC.  
 72 (B) Representative immunoblots and densitometry data of HU-induced pRPA2 (S4/8) and  $\gamma$ H2AX protein levels  
 73 with PPAR $\gamma$  depletion in PAEC.

74 (C) Densitometry data of restoration of pATM with siRNA-resistant PPAR $\gamma$  (siResPPAR $\gamma$ ) overexpression in  
75 HUVEC.  
76 (D) Densitometry data of HU-induced pATM and pKAP1 with PPAR $\gamma$  or/and ATMIN depletion in PAEC.  
77 (E) Confocal microscopy and triplicate quantitative data of effects of PPAR $\gamma$  depletion on pATM foci formation  
78 upon HU (24 hours) treatment in PAEC.  
79 (F) Confocal microscopy and triplicate quantitative data of effects of PPAR $\gamma$  depletion on  $\gamma$ H2AX foci formation  
80 upon HU (24 hours) treatment in PAEC.  
81 (G) Confocal microscopy and triplicate quantitative data of effects of PPAR $\gamma$  depletion by multiple siRNAs on  
82  $\gamma$ H2AX foci formation upon HU (24 hours) treatment in PAEC. PPAR $\gamma$  siRNAs (#7-9) are three out of the four  
83 individual PPAR $\gamma$  siRNAs used in the siP $\gamma$  pool.  
84 (H) Flow cytometry analysis of EdU incorporation shows cell cycle profiles of cells with PPAR $\gamma$  depletion and with  
85 HU (24 hours) treatment in PAEC.  
86 (I) Confocal microscopy and triplicate quantitative data of 8-oxo-dG foci upon hypoxia (24 hours) (< 0.1% O<sub>2</sub>) and  
87 10 min reoxygenation (Reoxy) in PAEC.  
88 (J) Replicate quantitative data of pATM foci with hypoxia-reoxygenation as described in (I).  
89 siC, siControl, siP $\gamma$ , siPPAR $\gamma$ . Error bars, mean  $\pm$  s.e.m. The line in the box-and-whisker plots marks the median and  
90 whiskers correspond to the 10<sup>th</sup> to 90<sup>th</sup> percentiles (E-G, I-J). Two-way ANOVA with Fisher's LSD test (A-D).  
91 Kruskal-Wallis ANOVA test with Dunn's test (E-G, I). Unpaired t test (J). \*, P < 0.05, \*\*, P < 0.01, \*\*\*, P < 0.001;  
92 \*\*\*\*, P < 0.0001. Scale bars, E-G, 50 $\mu$ m; I, 20 $\mu$ m.  
93

94 **Figure S5**

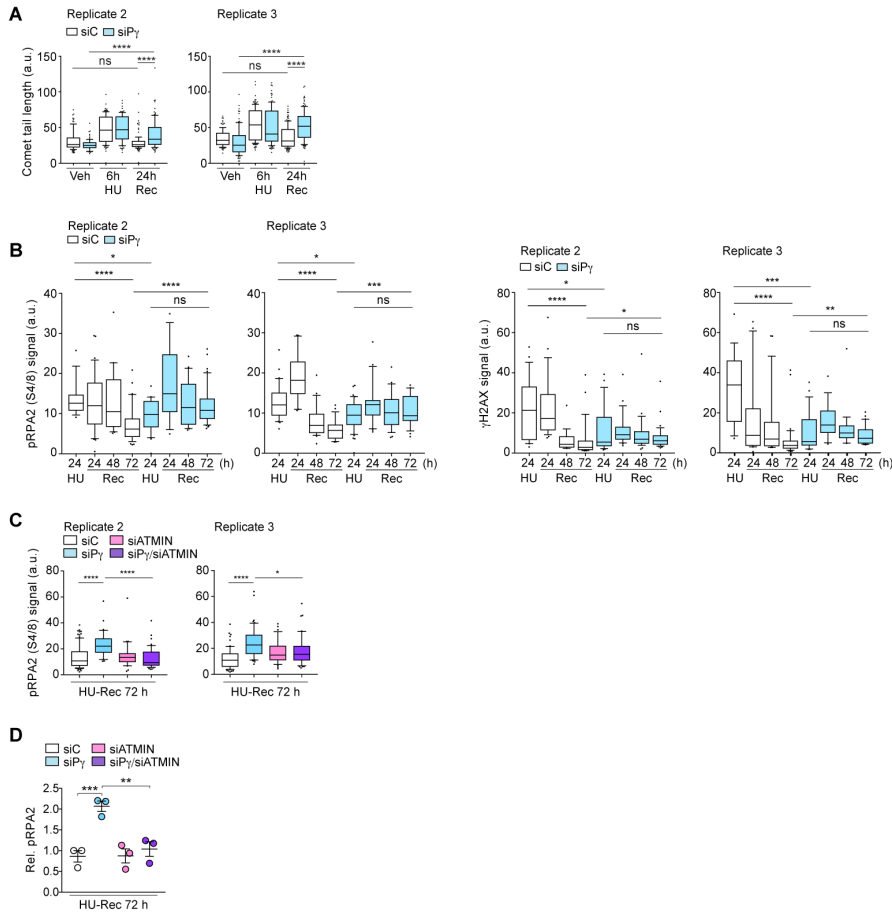

95 **Fig. S5 PPAR $\gamma$  depletion leads to persistent pRPA2 and  $\gamma$ H2AX foci after HU-induced damage which are**  
 96 **resolved by ATMIN depletion in PAEC. – Related to Figure 4.**

97 (A) Replicate quantitative data of extended comet tail lengths in PPAR $\gamma$  depleted cells after HU (6 hours) was  
 98 removed (recovery for 24 hours).  
 99

100 (B) Replicate quantitative data of pRPA2 and  $\gamma$ H2AX foci in PPAR $\gamma$  depleted cells after HU (24 hours) was  
 101 removed. Cells were fixed at various recovery time points as indicated.

102 (C) Replicate quantitative data of resolution of pRPA2 foci with ATMIN depletion in addition to PPAR $\gamma$  depletion.

103 (D) Densitometry data show restoration of pRPA2 protein levels with ATMIN depletion in addition to PPAR $\gamma$   
 104 depletion.

105 siC, siControl, siP $\gamma$ , siPPAR $\gamma$ . Error bars, mean  $\pm$  s.e.m. The line in the box-and-whisker plots marks the median and  
 106 whiskers correspond to the 10<sup>th</sup> to 90<sup>th</sup> percentiles (A-C). Kruskal–Wallis ANOVA test with Dunn’s test (A-C).

107 Two-way ANOVA with Fisher’s LSD test (D). \*, P < 0.05, \*\*, P < 0.01, \*\*\*, P < 0.001; \*\*\*\*, P < 0.0001, ns, not  
 108 significant.

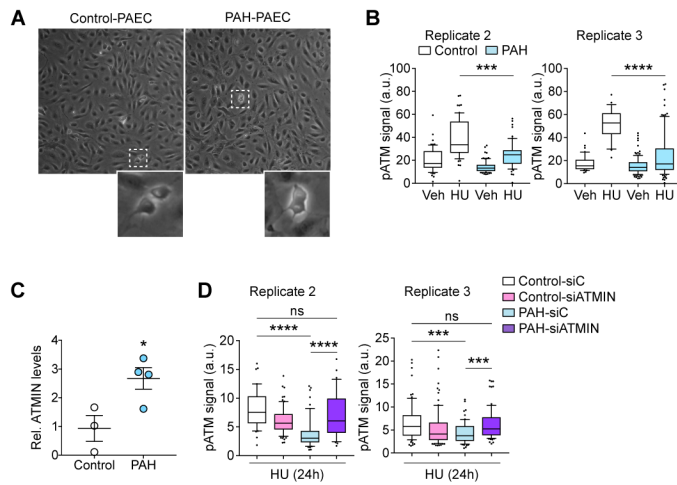

110  
 111 **Fig. S6 PPAR $\gamma$  and ATMIN axis is impaired in PAEC from PAH patients. – Related to Figure 5.**  
 112 (A) Phase-contrast microscopy shows healthy primary PAEC cultures established from explanted lungs of control  
 113 (unused donors) and PAH patient. Inserts indicate mitotic cells from the dotted square.  
 114 (B) Replicate quantitative data of HU-induced pATM levels in control and PAH-PAEC.  
 115 (C) Densitometry data of ATMIN protein levels in control and PAH-PAEC.  
 116 (D) Replicate quantitative data of pATM levels in control and PAH-PAEC with ATMIN depletion.  
 117 siC, siControl, siP $\gamma$ , siPPAR $\gamma$ . Error bars, mean  $\pm$  s.e.m. The line in the box-and-whisker plots marks the median and  
 118 whiskers correspond to the 10<sup>th</sup> to 90<sup>th</sup> percentiles (B,D). Kruskal–Wallis ANOVA test with Dunn’s test (B,D).  
 119 Unpaired t test (C). \*, P < 0.05, \*\*\*, P < 0.001; \*\*\*\*, P < 0.0001, ns, not significant.  
 120

**Table S1 High-confidence PPAR $\gamma$  interactors identified from AP-MS. – Related to Figure 1; Figure S1.**

| Uniprot ID | Log2FC | Adj. P value | Gene name     | Protein name                                                      |
|------------|--------|--------------|---------------|-------------------------------------------------------------------|
| P37231     | 7.32   | 0            | <b>PPARG</b>  | Peroxisome proliferator-activated receptor gamma                  |
| P04637     | 6.9    | 0            | TP53          | Cellular tumor antigen p53                                        |
| P11142     | 6.22   | 0            | HSPA8         | Heat shock cognate 71 kDa protein                                 |
| O95816     | 6.22   | 0            | BAG2          | BAG family molecular chaperone regulator 2                        |
| P19793     | 6.17   | 0            | <b>RXRA</b>   | Retinoic acid receptor RXR-alpha                                  |
| P23396     | 5.86   | 0            | RPS3          | 40S ribosomal protein S3                                          |
| P52272     | 5.18   | 0            | HNRNPM        | Heterogeneous nuclear ribonucleoprotein M                         |
| P31943     | 5.08   | 0            | HNRNPH1       | Heterogeneous nuclear ribonucleoprotein H, N-terminally processed |
| P49411     | 4.97   | 0            | TUFM          | Elongation factor Tu, mitochondrial                               |
| P49368     | 4.82   | 0            | CCT3          | T-complex protein 1 subunit gamma                                 |
| Q92841     | 4.74   | 0            | DDX17         | Probable ATP-dependent RNA helicase DDX17                         |
| P08107     | 4.53   | 0            | HSPA1B        | Heat shock 70 kDa protein 1A/1B                                   |
| P17987     | 4.38   | 0            | TCP1          | T-complex protein 1 subunit alpha                                 |
| P55072     | 3.98   | 0            | VCP           | Transitional endoplasmic reticulum ATPase                         |
| Q9UL15     | 3.91   | 0            | BAG5          | BAG family molecular chaperone regulator 5                        |
| Q08211     | 3.87   | 0            | DHX9          | ATP-dependent RNA helicase A                                      |
| P18669     | 3.74   | 0            | PGAM1         | Phosphoglycerate mutase 1                                         |
| P48047     | 3.43   | 0            | ATP5O         | ATP synthase subunit O, mitochondrial                             |
| P52209     | 3.43   | 0            | PGD           | 6-phosphogluconate dehydrogenase, decarboxylating                 |
| Q9Y265     | 3.05   | 0            | RUVBL1        | RuvB-like 1                                                       |
| Q9Y230     | 3.03   | 0            | RUVBL2        | RuvB-like 2                                                       |
| P38646     | 3      | 0            | HSPA9         | Stress-70 protein, mitochondrial                                  |
| P11021     | 2.74   | 0            | HSPA5         | 78 kDa glucose-regulated protein                                  |
| P13796     | 2.65   | 0            | LCP1          | Plastin-2                                                         |
| P50990     | 2.65   | 0            | CCT8          | T-complex protein 1 subunit theta                                 |
| O14830     | 2.16   | 0            | PPEF2         | Serine/threonine-protein phosphatase with EF-hands 2              |
| P47929     | 2.11   | 0            | LGALS7        | Galectin-7                                                        |
| P49959     | 2.08   | 0            | <b>MRE11A</b> | Meiotic recombination 11 MRE11A                                   |
| Q02880     | 2      | 0            | TOP2B         | DNA topoisomerase 2-beta                                          |
| Q9H0A0     | 1.83   | 0            | NAT10         | N-acetyltransferase 10                                            |
| Q9Y490     | 1.79   | 0            | TLN1          | Talin-1                                                           |
| P15927     | 1.58   | 0            | RPA2          | Replication protein A 32 kDa subunit                              |
| P49916     | 1.55   | 0            | LIG3          | DNA ligase 3                                                      |
| Q9UBQ0     | 1.54   | 0            | VPS29         | Vacuolar protein sorting-associated protein 29                    |
| P62241     | 7.17   | 5.57E-15     | RPS8          | 40S ribosomal protein S8                                          |
| Q86U86     | 5.1    | 1.02E-14     | PBRM1         | Protein polybromo-1                                               |
| Q7Z2W4     | 5.06   | 1.02E-14     | ZC3HAV1       | Zinc finger CCCH-type antiviral protein 1                         |
| Q92945     | 4.55   | 1.02E-14     | KHSRP         | Far upstream element-binding protein 2                            |
| Q6Y7W6     | 1.83   | 2.01E-14     | GIGYF2        | PERQ amino acid-rich with GYF domain-containing protein 2         |
| P33993     | 4.09   | 2.95E-14     | MCM7          | DNA replication licensing factor MCM7                             |
| P17066     | 3.06   | 3.37E-14     | HSPA6         | Heat shock 70 kDa protein 6                                       |
| Q13263     | 3.26   | 8.51E-14     | TRIM28        | Transcription intermediary factor 1-beta                          |
| Q9H583     | 1.86   | 1.02E-13     | HEATR1        | HEAT repeat-containing protein 1, N-terminally processed          |
| P42704     | 1.71   | 1.05E-13     | LRPPRC        | Leucine-rich PPR motif-containing protein, mitochondrial          |
| P62906     | 4.96   | 1.07E-13     | RPL10A        | 60S ribosomal protein L10a                                        |
| Q14151     | 4.04   | 2.02E-13     | SAFB2         | Scaffold attachment factor B2                                     |
| Q15393     | 3.32   | 3.40E-13     | SF3B3         | Splicing factor 3B subunit 3                                      |
| P78316     | 2.24   | 3.40E-13     | NOP14         | Nucleolar protein 14                                              |
| P62424     | 2.14   | 3.78E-13     | RPL7A         | 60S ribosomal protein L7a                                         |



|        |      |          |          |                                                                                               |
|--------|------|----------|----------|-----------------------------------------------------------------------------------------------|
| P32969 | 5.6  | 6.05E-13 | RPL9P7   | 60S ribosomal protein L9                                                                      |
| P78347 | 4.3  | 6.89E-13 | GTF2I    | General transcription factor II-I                                                             |
| Q99615 | 4.96 | 9.02E-13 | DNAJC7   | DnaJ homolog subfamily C member 7                                                             |
| Q15029 | 3.75 | 9.05E-13 | EFTUD2   | 116 kDa U5 small nuclear ribonucleoprotein component                                          |
| Q9NVP1 | 2.43 | 9.05E-13 | DDX18    | ATP-dependent RNA helicase DDX18                                                              |
| O75368 | 1.91 | 1.10E-12 | SH3BGRL  | SH3 domain-binding glutamic acid-rich-like protein                                            |
| O95786 | 2.4  | 1.11E-12 | DDX58    | Probable ATP-dependent RNA helicase DDX58                                                     |
| P28702 | 4.1  | 1.50E-12 | RXRβ     | Retinoic acid receptor RXR-beta                                                               |
| P61978 | 2.25 | 1.66E-12 | HNRNPK   | Heterogeneous nuclear ribonucleoprotein K                                                     |
| Q96EY1 | 5.01 | 2.90E-12 | DNAJA3   | DnaJ homolog subfamily A member 3, mitochondrial                                              |
| Q8N1F7 | 2.57 | 3.12E-12 | NUP93    | Nuclear pore complex protein Nup93                                                            |
| O60934 | 2.32 | 8.83E-12 | NBS1     | Nibrin                                                                                        |
| O00231 | 4.86 | 1.18E-11 | PSMD11   | 26S proteasome non-ATPase regulatory subunit 11                                               |
| Q12906 | 5.8  | 1.22E-11 | ILF3     | Interleukin enhancer-binding factor 3                                                         |
| Q92878 | 1.77 | 1.47E-11 | RAD50    | DNA repair protein RAD50                                                                      |
| O60264 | 1.76 | 2.00E-11 | SMARCA5  | SWI/SNF-related matrix-associated actin-dependent regulator of chromatin subfamily A member 5 |
| O15042 | 5.15 | 2.02E-11 | U2SURP   | U2 snRNP-associated SURP motif-containing protein                                             |
| O76021 | 2.28 | 2.53E-11 | RSL1D1   | Ribosomal L1 domain-containing protein 1                                                      |
| P62191 | 3.77 | 3.35E-11 | PSMC1    | 26S protease regulatory subunit 4                                                             |
| P46087 | 3.91 | 3.67E-11 | NOP2     | Probable 28S rRNA (cytosine(4447)-C(5))-methyltransferase                                     |
| Q9Y2R4 | 3.68 | 4.88E-11 | DDX52    | Probable ATP-dependent RNA helicase DDX52                                                     |
| Q9BVJ6 | 4.41 | 4.97E-11 | UTP14A   | U3 small nucleolar RNA-associated protein 14 homolog A                                        |
| O15144 | 2.26 | 5.08E-11 | ARPC2    | Actin-related protein 2/3 complex subunit 2                                                   |
| Q12905 | 3.1  | 5.40E-11 | ILF2     | Interleukin enhancer-binding factor 2                                                         |
| P62701 | 4.93 | 5.77E-11 | RPS4X    | 40S ribosomal protein S4, X isoform                                                           |
| Q9BZE4 | 2.7  | 7.08E-11 | GTPBP4   | Nucleolar GTP-binding protein 1                                                               |
| O75367 | 2.76 | 9.21E-11 | H2AFY    | Core histone macro-H2A.1                                                                      |
| P15924 | 1.62 | 9.21E-11 | DSP      | Desmoplakin                                                                                   |
| Q9Y2X3 | 4.4  | 9.27E-11 | NOP58    | Nucleolar protein 58                                                                          |
| Q8WVV4 | 1.54 | 1.01E-10 | POF1B    | Protein POF1B                                                                                 |
| P17931 | 2.23 | 2.46E-10 | LGALS3   | Galectin-3                                                                                    |
| Q9BVP2 | 2.07 | 3.14E-10 | GNL3     | Guanine nucleotide-binding protein-like 3                                                     |
| P26038 | 2.36 | 3.16E-10 | MSN      | Moesin                                                                                        |
| P06702 | 1.91 | 3.16E-10 | S100A9   | Protein S100-A9                                                                               |
| P07900 | 3.08 | 3.80E-10 | HSP90AA1 | Heat shock protein HSP 90-alpha                                                               |
| P31689 | 3.87 | 4.49E-10 | DNAJA1   | DnaJ homolog subfamily A member 1                                                             |
| O15511 | 2.34 | 5.01E-10 | ARPC5    | Actin-related protein 2/3 complex subunit 5                                                   |
| O15160 | 3.33 | 5.70E-10 | POLR1C   | DNA-directed RNA polymerases I and III subunit RPAC1                                          |
| O43818 | 1.72 | 9.22E-10 | RRP9     | U3 small nucleolar RNA-interacting protein 2                                                  |

122  
123  
124  
125  
126  
127

Proteins co-purified with Flag-PPAR $\gamma$  from 293T nuclear extracts were detected by mass spectrometry and analyzed as described in Experimental Procedures. Proteins in red were validated in Fig. 1c. Log<sub>2</sub>FC (Fold-Change) indicates the fold enrichment of proteins immunoprecipitated from Flag-PPAR $\gamma$  expressing cells as compared to Flag-vector expressing cells. The adjusted (adj.) P values are indicated and the data was obtained from four independent experiments. Proteins are listed by their adj. P values.

128  
129  
130

**Table S2**  
**Biological functions associated with the high-confidence PPAR $\gamma$  interactome. – Related to Figure 1; Figure S1.**

| <b>Uniprot ID</b> | <b>Gene name</b> | <b>Biological function name</b>           |
|-------------------|------------------|-------------------------------------------|
| O15144            | ARPC2            | Actin cytoskeleton organization           |
| O15511            | ARPC5            | Actin cytoskeleton organization           |
| P47929            | LGALS7           | Cell-cell interaction                     |
| Q8WVV4            | POF1B            | Cell-cell interaction                     |
| Q9Y490            | TLN1             | Cell-cell interaction                     |
| P48047            | ATP5O            | Cellular metabolism                       |
| O95816            | BAG2             | Cellular metabolism                       |
| Q9UL15            | BAG5             | Cellular metabolism                       |
| P18669            | PGAM1            | Cellular metabolism                       |
| P52209            | PGD              | Cellular metabolism                       |
| P37231            | PPARG            | Cellular metabolism                       |
| P19793            | RXRA             | Cellular metabolism                       |
| P28702            | RXRB             | Cellular metabolism                       |
| P49411            | TUFM             | Cellular metabolism                       |
| Q9UBQ0            | VPS29            | Cellular metabolism                       |
| Q08211            | DHX9             | DNA damage response and replication       |
| P31689            | DNAJA1           | DNA damage response and replication       |
| Q96EY1            | DNAJA3           | DNA damage response and replication       |
| O75367            | H2AFY            | DNA damage response and replication       |
| P07900            | HSP90AA1         | DNA damage response and replication       |
| P08107            | HSPA1B           | DNA damage response and replication       |
| P11142            | HSPA8            | DNA damage response and replication       |
| Q92945            | KHSRP            | DNA damage response and replication       |
| P49916            | LIG3             | DNA damage response and replication       |
| P42704            | LRPPRC           | DNA damage response and replication       |
| P33993            | MCM7             | DNA damage response and replication       |
| P49959            | MRE11A           | DNA damage response and replication       |
| O60934            | NBN              | DNA damage response and replication       |
| Q8N1F7            | NUP93            | DNA damage response and replication       |
| Q86U86            | PBRM1            | DNA damage response and replication       |
| P62191            | PSMC1            | DNA damage response and replication       |
| O00231            | PSMD11           | DNA damage response and replication       |
| Q92878            | RAD50            | DNA damage response and replication       |
| P15927            | RPA2             | DNA damage response and replication       |
| Q9Y265            | RUVBL1           | DNA damage response and replication       |
| Q9Y230            | RUVBL2           | DNA damage response and replication       |
| Q14151            | SAFB2            | DNA damage response and replication       |
| O60264            | SMARCA5          | DNA damage response and replication       |
| Q02880            | TOP2B            | DNA damage response and replication       |
| P04637            | TP53             | DNA damage response and replication       |
| Q13263            | TRIM28           | DNA damage response and replication       |
| P55072            | VCP              | DNA damage response and replication       |
| O95786            | DDX58            | Innate immune response                    |
| P13796            | LCPI             | Innate immune response                    |
| P17931            | LGALS3           | Innate immune response                    |
| P06702            | S100A9           | Innate immune response                    |
| Q7Z2W4            | ZC3HAV1          | Innate immune response                    |
| Q92841            | DDX17            | mRNA metabolic process and RNA processing |
| Q9NVP1            | DDX18            | mRNA metabolic process and RNA processing |
| Q9Y2R4            | DDX52            | mRNA metabolic process and RNA processing |

|        |         |                                           |
|--------|---------|-------------------------------------------|
| Q15029 | EFTUD2  | mRNA metabolic process and RNA processing |
| Q6Y7W6 | GIGYF2  | mRNA metabolic process and RNA processing |
| Q9BVP2 | GNL3    | mRNA metabolic process and RNA processing |
| Q9BZE4 | GTPBP4  | mRNA metabolic process and RNA processing |
| Q9H583 | HEATR1  | mRNA metabolic process and RNA processing |
| P31943 | HNRNPH1 | mRNA metabolic process and RNA processing |
| P61978 | HNRNPK  | mRNA metabolic process and RNA processing |
| P52272 | HNRNPM  | mRNA metabolic process and RNA processing |
| Q12905 | ILF2    | mRNA metabolic process and RNA processing |
| Q12906 | ILF3    | mRNA metabolic process and RNA processing |
| Q9H0A0 | NAT10   | mRNA metabolic process and RNA processing |
| P78316 | NOP14   | mRNA metabolic process and RNA processing |
| P46087 | NOP2    | mRNA metabolic process and RNA processing |
| Q9Y2X3 | NOP58   | mRNA metabolic process and RNA processing |
| P62906 | RPL10A  | mRNA metabolic process and RNA processing |
| P62424 | RPL7A   | mRNA metabolic process and RNA processing |
| P32969 | RPL9P7  | mRNA metabolic process and RNA processing |
| P23396 | RPS3    | mRNA metabolic process and RNA processing |
| P62701 | RPS4X   | mRNA metabolic process and RNA processing |
| P62241 | RPS8    | mRNA metabolic process and RNA processing |
| O43818 | RRP9    | mRNA metabolic process and RNA processing |
| O76021 | RSL1D1  | mRNA metabolic process and RNA processing |
| Q15393 | SF3B3   | mRNA metabolic process and RNA processing |
| O15042 | U2SURP  | mRNA metabolic process and RNA processing |
| Q9BVJ6 | UTP14A  | mRNA metabolic process and RNA processing |
| P49368 | CCT3    | Protein folding                           |
| P50990 | CCT8    | Protein folding                           |
| Q99615 | DNAJC7  | Protein folding                           |
| P15924 | DSP     | Protein folding                           |
| P11021 | HSPA5   | Protein folding                           |
| P17066 | HSPA6   | Protein folding                           |
| P38646 | HSPA9   | Protein folding                           |
| P26038 | MSN     | Protein folding                           |
| P17987 | TCP1    | Protein folding                           |
| P78347 | GTF2I   | NA                                        |
| O15160 | POLR1C  | NA                                        |
| O14830 | PPEF2   | NA                                        |
| O75368 | SH3BGRL | NA                                        |

131  
132  
133  
134

Biological functions enriched among the top ranked 87 PPAR $\gamma$  interactors defined in Supplementary Table 1. NA, not available.

135 **Table S3**  
 136 **Tandem affinity purification identified proteins interacting with PPAR $\gamma$  and NBS1 in unperturbed cells. –**  
 137 **Related to Figure 1.**

| Uniprot ID | Log <sub>2</sub> FC | Adj. P value | Gene name | Protein name                                                         |
|------------|---------------------|--------------|-----------|----------------------------------------------------------------------|
| O60934     | 6.24                | 0            | NBS1      | Nibrin                                                               |
| P37231     | 6.03                | 0            | PPARG     | Peroxisome proliferator-activated receptor gamma                     |
| P49959     | 5.22                | 0            | MRE11A    | Meiotic recombination 11 MRE11A                                      |
| Q92878     | 5.01                | 0            | RAD50     | DNA repair protein RAD50                                             |
| O95816     | 3.7                 | 1.71E-08     | BAG2      | BAG family molecular chaperone regulator 2                           |
| Q9UL15     | 2.9                 | 4.03E-07     | BAG5      | BAG family molecular chaperone regulator 5                           |
| O75594     | 2.56                | 2.25E-02     | PGLYRP1   | Peptidoglycan recognition protein 1                                  |
| P04637     | 2.46                | 7.99E-09     | TP53      | Cellular tumor antigen p53                                           |
| P62269     | 2.2                 | 0            | RPS18     | 40S ribosomal protein S18                                            |
| Q07021     | 2.1                 | 2.05E-08     | C1QBP     | Complement component 1 Q subcomponent-binding protein, mitochondrial |
| P23588     | 1.96                | 4.10E-10     | EIF4B     | Eukaryotic translation initiation factor 4B                          |
| Q02878     | 1.93                | 0            | RPL6      | 60S ribosomal protein L6                                             |
| P18124     | 1.9                 | 1.60E-13     | RPL7      | 60S ribosomal protein L7                                             |
| P34932     | 1.84                | 0            | HSPA4     | Heat shock 70 kDa protein 4                                          |
| P50914     | 1.8                 | 0            | RPL14     | 60S ribosomal protein L14                                            |
| O95071     | 1.8                 | 3.37E-02     | UBR5*     | E3 ubiquitin-protein ligase UBR5                                     |
| P98175     | 1.78                | 4.19E-11     | RBM10     | RNA-binding protein 10                                               |
| P62701     | 1.66                | 7.94E-07     | RPS4X     | 40S ribosomal protein S4, X isoform                                  |
| P62333     | 1.65                | 2.25E-03     | PSMC6*    | 26S protease regulatory subunit 10B                                  |
| Q9Y2W1     | 1.55                | 7.34E-11     | THRAP3*   | Thyroid hormone receptor-associated protein 3                        |
| P11142     | 1.54                | 0            | HSPA8     | Heat shock cognate 71 kDa protein                                    |

138  
 139 Proteins were co-purified with PPAR $\gamma$ -2xStrep and sequentially with Flag-NBS1 from 293T whole cell extracts  
 140 [unperturbed cells or with HU treatment (Supplementary Table 4)]. Log<sub>2</sub>FC indicates the fold enrichment of proteins  
 141 immunoprecipitated from the PPAR $\gamma$ -2xStrep and Flag-NBS1 expressing cells as compared to GFP-Strep-Flag  
 142 expressing cells (negative control). The adjusted P value is indicated and the data were obtained from three  
 143 independent experiments.

144 \* indicates proteins specifically enriched in unperturbed cells but not present in the HU treated cells. THRAP3 and  
 145 UBR5 (red) are validated in Fig. 1e, f. Proteins are listed by the Log<sub>2</sub>FC.

146 **Table S4**  
 147 **Tandem affinity purification identified proteins interacting with PPAR $\gamma$  and NBS1 upon HU treatment. –**  
 148 **Related to Figure 1.**

| Uniprot ID | Log <sub>2</sub> FC | Adj. P value | Gene name | Protein name                                                         |
|------------|---------------------|--------------|-----------|----------------------------------------------------------------------|
| O60934     | 6.25                | 0            | NBS1      | Nibrin                                                               |
| P37231     | 6.09                | 0            | PPARG     | Peroxisome proliferator-activated receptor gamma                     |
| P49959     | 5.02                | 0            | MRE11A    | Meiotic recombination 11 MRE11A                                      |
| Q92878     | 4.78                | 0            | RAD50     | DNA repair protein RAD50                                             |
| O95816     | 3.88                | 6.05E-09     | BAG2      | BAG family molecular chaperone regulator 2                           |
| Q9UL15     | 3.65                | 7.27E-08     | BAG5      | BAG family molecular chaperone regulator 5                           |
| Q92552     | 3.16                | 3.37E-02     | MRPS27*   | 28S ribosomal protein S27, mitochondrial                             |
| O75594     | 2.7                 | 2.17E-02     | PGLYRP1   | Peptidoglycan recognition protein 1                                  |
| Q02878     | 2.61                | 0            | RPL6      | 60S ribosomal protein L6                                             |
| P18124     | 2.58                | 0            | RPL7      | 60S ribosomal protein L7                                             |
| Q07021     | 2.36                | 1.18E-09     | C1QBP     | Complement component 1 Q subcomponent-binding protein, mitochondrial |
| P04637     | 2.08                | 6.15E-07     | TP53      | Cellular tumor antigen p53                                           |
| P50914     | 2.07                | 0            | RPL14     | 60S ribosomal protein L14                                            |
| P43686     | 1.89                | 1.08E-07     | PSMC4*    | 26S protease regulatory subunit 6B                                   |
| Q9BRT6     | 1.87                | 4.32E-02     | LLPH*     | Protein LLP homolog                                                  |
| O60318     | 1.83                | 2.30E-02     | MCM3AP*   | Germinal-center associated nuclear protein                           |
| P11388     | 1.82                | 3.49E-09     | TOP2A*    | DNA topoisomerase 2-alpha                                            |
| P23588     | 1.79                | 1.21E-09     | EIF4B     | Eukaryotic translation initiation factor 4B                          |
| P62269     | 1.78                | 0            | RPS18     | 40S ribosomal protein S18                                            |
| P98175     | 1.76                | 1.56E-11     | RBM10     | RNA-binding protein 10                                               |
| Q75N03     | 1.73                | 1.62E-02     | CBLL1*    | E3 ubiquitin-protein ligase Hakai                                    |
| P40429     | 1.71                | 2.38E-02     | RPL13A*   | 60S ribosomal protein L13a                                           |
| Q02880     | 1.7                 | 3.50E-04     | TOP2B*    | DNA topoisomerase 2-beta                                             |
| P36578     | 1.69                | 9.59E-14     | RPL4*     | 60S ribosomal protein L4                                             |
| Q9HAN9     | 1.67                | 3.64E-04     | NMNAT1*   | Nicotinamide/nicotinic acid mononucleotide adenylyltransferase 1     |
| P62917     | 1.65                | 0            | RPL8*     | 60S ribosomal protein L8                                             |
| Q07020     | 1.64                | 6.87E-10     | RPL18*    | 60S ribosomal protein L18                                            |
| P62266     | 1.62                | 6.37E-07     | RPS23*    | 40S ribosomal protein S23                                            |
| P62847     | 1.61                | 3.98E-09     | RPS24*    | 40S ribosomal protein S24                                            |
| P34932     | 1.61                | 8.63E-14     | HSPA4     | Heat shock 70 kDa protein 4                                          |
| P62701     | 1.59                | 9.46E-07     | RPS4X     | 40S ribosomal protein S4, X isoform                                  |
| P11142     | 1.58                | 0            | HSPA8     | Heat shock cognate 71 kDa protein                                    |
| P62158     | 1.56                | 2.83E-06     | CALM2*    | Calmodulin                                                           |
| P62249     | 1.55                | 5.53E-09     | RPS16*    | 40S ribosomal protein S16                                            |
| P62241     | 1.54                | 1.43E-08     | RPS8*     | 40S ribosomal protein S8                                             |
| P49368     | 1.51                | 2.20E-02     | CCT3*     | T-complex protein 1 subunit gamma                                    |

149  
 150 Proteins were co-purified with PPAR $\gamma$ -2xStrep and sequentially with Flag-NBS1 from 293T whole cell extracts with  
 151 HU treatment. Log<sub>2</sub>FC (Fold-Change) indicates the fold enrichment of proteins immunoprecipitated from the  
 152 PPAR $\gamma$ -2xStrep and Flag-NBS1 expressing cells as compared to GFP-Strep-Flag expressing cells (negative control).  
 153 The adjusted P value is indicated and the data were obtained from three independent experiments. \* indicates  
 154 proteins specifically enriched in the HU treated cells but not present in unperturbed cells. Proteins are listed by the  
 155 Log<sub>2</sub>FC.



156 **Table S5 – Related to STAR Methods.**  
 157 **Characteristics of (a) control subjects and (b) PAH patients used in this study.**  
 158 (a) Control

| <b>Control ID</b> | <b>Cells/<br/>Tissues</b> | <b>Assays</b>                       | <b>Age (yr)/<br/>Gender</b> | <b>Race/<br/>Ethnicity</b>        | <b>Cause of Death</b>                                                             |
|-------------------|---------------------------|-------------------------------------|-----------------------------|-----------------------------------|-----------------------------------------------------------------------------------|
| Control-1         | Tissue                    | IF                                  | 41/F                        | White/<br>Non-<br>Hispanic        | Grade 4 subarachnoid hemorrhage,<br>ruptured anterior cerebral artery<br>aneurysm |
| Control-2         | Tissue                    | IF                                  | 43/M                        | White/<br>Non-<br>Hispanic        | Fatal gunshot to head                                                             |
| Control-3         | Tissue                    | IF                                  | 57/F                        | White/<br>Non-<br>Hispanic        | Intracranial hemorrhage/stroke                                                    |
| Control-4         | Tissue                    | IF                                  | 28/F                        | White/<br>Non-<br>Hispanic        | MVC-anoxia                                                                        |
| Control-5         | SPAEC                     | Comet                               | 47/M                        | White/<br>Non-<br>Hispanic        | Head trauma-bicycle vs. car accident                                              |
| Control-6         | Tissue                    | IF                                  | 56/F                        | White/<br>Non-<br>Hispanic        | Cerebrovascular accident                                                          |
| Control-7         | SPAEC                     | Comet                               | 55/F                        | Unknown/<br>Hispanic<br>or Latino | Cerebrovascular stroke                                                            |
| Control-8         | Tissue/<br>LPAEC          | IF, comet,<br>protein<br>expression | 57-F                        | White/<br>Non-<br>Hispanic        | Acute myocardial infarction                                                       |
| Control-9         | LPAEC                     | Comet                               | 12/M                        | Unknown/<br>Non-<br>Hispanic      | Head trauma rollover MVC ejection                                                 |
| Control-10        | LPAEC                     | Comet                               | 49/M                        | White/<br>Non-<br>Hispanic        | Head trauma                                                                       |
| Control-11        | SPAEC                     | Protein<br>expression               | 33/F                        | White/<br>Non-<br>Hispanic        | Head trauma. Blunt injury.                                                        |

|             |       |                        |      |                            |                            |
|-------------|-------|------------------------|------|----------------------------|----------------------------|
| Control-12  | LPAEC | IP, protein expression | 54/M | Unknown/Hispanic or Latino | Cerebrovascular/stroke ICH |
| Control-13  | LPAEC | IP, protein expression | 34/F | Asian/Non-Hispanic         | Cerebrovascular/stroke ICH |
| Control-14  | LPAEC | IP                     | 1/M  | White/Non-Hispanic         | Anoxia/drowning            |
| Control-15* | LPAEC | IP, protein expression | 35/M | White/Non-Hispanic         | Gunshot wound              |
| Control-16  | LPAEC | IP, protein expression | 46/M | Asian/Unknown              | Cerebrovascular/stroke ICH |

159

160 (b) PAH patients

| Patient ID | Cells/Tissues      | Assays                 | Age (yr)/Gender | Race/Ethnicity                         | Diagnosis | BMPR2 mutation | (s/d/m)PAPa  | PVRb (mmHg) | 6 Min Walkc (Wood Units) | PAH Medications (m), up to transplant date       |
|------------|--------------------|------------------------|-----------------|----------------------------------------|-----------|----------------|--------------|-------------|--------------------------|--------------------------------------------------|
| PAH-1      | Tissue             | IF                     | 15-F            | White/Non-Hispanic                     | IPAH      | No             | (175/66/102) | 25.24       | 387                      | sildenafil, epoprostenol                         |
| PAH-2      | Tissue             | IF                     | 40-F            | White/Non-Hispanic                     | IPAH      | No             | (84/26/47)   | NA          | 294                      | ambrisentan, sildenafil, iloprost, epoprostenol  |
| PAH-3      | LPAEC              | Protein expresso<br>pm | 33-F            | Black or African American/Non-Hispanic | FPAH      | Yes            | (75/33/48)   | 15.57       | 326.1                    | epoprostenol, bosentan, sildenafil, treprostinil |
| PAH-4      | Tissue             | IF                     | 56-F            | White/Non-Hispanic                     | IPAH      | No             | (83/39/57)   | 11.41       | 137.2                    | sildenafil, ambrisentan, treprostinil            |
| PAH-5      | Tissue,S/<br>LPAEC | IF, comet,             | 27-F            | White/Non-Hispanic                     | IPAH      | Yes            | (110/49/69)  | 12.11       | 359.7                    | sildenafil, treprostinil, bosentan, iloprost     |

|        |                  |                                         |      |                                 |                             |     |             |       |       |                                                                                                          |
|--------|------------------|-----------------------------------------|------|---------------------------------|-----------------------------|-----|-------------|-------|-------|----------------------------------------------------------------------------------------------------------|
| PAH-6  | SPAEC            | Comet                                   | 40-M | White/<br>Hispanic<br>or Latino | IPAH                        | No  | (118/49/64) | 73    | 420   | sildenafil, ambrisentan,<br>treprostinil                                                                 |
| PAH-7  | SPAEC            | Comet                                   | 37-M | White/<br>Non-<br>Hispanic      | FPAH                        | Yes | (119/51/77) | 14.22 | 309   | sildenafil, sitaxsentan,<br>ambrisentan,<br>epoprostenol, imatinib<br>(investigational),<br>treprostinil |
| PAH-8  | LPAEC            | Comet, IP,<br>protein<br>expression     | 32-F | White/<br>Non-<br>Hispanic      | IPAH                        | No  | (68/38/49)  | 15.34 | 238   | bosentan, epoprostenol                                                                                   |
| PAH-9  | Tissue/<br>LPAEC | IF, comet,<br>IP, protein<br>expression | 30-M | White/<br>Non-<br>Hispanic      | APAH-<br>Congenita<br>I ASD | No  | (128/60/85) | NA    | 160   | sildenafil, bosentan                                                                                     |
| PAH-10 | LPAEC            | IP, protein<br>expression               | 16-F | White/<br>Non-<br>Hispanic      | IPAH                        | N/A | (NA/NA/95)  | N/A   | 102.4 | sildenafil, subcutaneous<br>treprostinil                                                                 |
| PAH-11 | LPAEC            | Protein<br>expression                   | 50-F | White/<br>Hispanic<br>or Latino | APAH-<br>D&T                | N/A | (113/43/65) | 16.18 | 384   | sildenafil, ambrisentan,<br>bosentan, treprostinil,<br>epoprostenol                                      |
| PAH-12 | LPAEC            | Protein<br>expression                   | 22-F | White/<br>Non-<br>Hispanic      | FPAH                        | Yes | (98/46/66)  | 10.19 | 506   | sildenafil, ambrisentan,<br>tadalafil, treprostinil                                                      |

161

162 a (s/d/m) PAP= Systolic, diastolic, and mean pulmonary arterial pressure. b PVR= Pulmonary vascular resistance. c 6 min walk = distance walked in six minutes.

163 a-c Values are closest to transplant date. \* Control line that did not meet PHBI inclusion criteria due to known history of amphetamine/methamphetamine use.

164 Abbreviations: SPAEC, small pulmonary arterial endothelial cells (<1 mm by dissection); LPAEC, large PAEC (>1 mm); IF, immunofluorescence; IP,

165 immunoprecipitation; F, female; M, male; MVC, motor vehicle accident; ICH, intracranial hemorrhage; IPAH, idiopathic pulmonary arterial hypertension;

166 FPAH, familiar PAH; APAH, associated PAH; ASD, atrial septal defect ; D&T, drug and toxin; NA, not available.

167 **Table S6 – Related to STAR Methods.**  
 168 **Table of Oligonucleotides used.**  
 169

| Oligo                   | Sequence (5'-3')                               | Description                                                   |
|-------------------------|------------------------------------------------|---------------------------------------------------------------|
| PPAR $\gamma$ -delLBD_F | GTGGCCATCCGCATCTGACAGGGCTGCCAGTTTCG            | Primer used for generating Flag-PPAR $\gamma$ $\Delta$ LBD    |
| PPAR $\gamma$ -delLBD_R | CGAAACTGGCAGCCCTGTCAGATGCCGATGGCCAC            | Primer used for generating Flag-PPAR $\gamma$ $\Delta$ LBD    |
| 2Strep-PPAR $\gamma$ -F | TAGTCCAGTGTGGTGGAAATTCGCCGCATGACCATGGTTGACACAG | Primer used for generating 2xStrep-PPAR $\gamma$              |
| 2Strep-PPAR $\gamma$ -R | CACCGCCTCCCTCGAGCGGCCGCACGTACAAGTCCTTGATG      | Primer used for generating 2xStrep-PPAR $\gamma$              |
| siRES-PPAR $\gamma$ _F  | ATGACAGCGATCTCGCAATATTTATTGCTGTCAATTATC        | Primer used for generating siRNA-resistant-Flag-PPAR $\gamma$ |
| siRES-PPAR $\gamma$ _R  | TAAATATTGCGAGATCGCTGTCATCTAATTCCAGTG           | Primer used for generating siRNA-resistant-Flag-PPAR $\gamma$ |
| PPAR $\gamma$ _F        | GCCGTGGCCGCAGATTTGAAAGA                        | Primer used for quantitative real-time PCR                    |
| PPAR $\gamma$ _R        | TACGGAGAGATCCACGGAGCTGATAC                     | Primer used for quantitative real-time PCR                    |
| UBR5_F                  | CCTGCTCACTGCTACTAATCTG                         | Primer used for quantitative real-time PCR                    |
| UBR5_R                  | ATTCGAGGTGGCCTGTATTG                           | Primer used for quantitative real-time PCR                    |
| ATMIN_F                 | AACAGCACTGCAGTCTCACAA                          | Primer used for quantitative real-time PCR                    |
| ATMIN_R                 | CTGGTCTAGGGATTGGTTGGT                          | Primer used for quantitative real-time PCR                    |
| NBS1_F                  | CACTCACCTTGTCATGGTATCAG                        | Primer used for quantitative real-time PCR                    |
| NBS1_R                  | CTGCTTCTTGGACTCAA CTGC                         | Primer used for quantitative real-time PCR                    |
| PLIN2_F                 | ATGGCATCCGTTGCAGTTGAT                          | Primer used for quantitative real-time PCR                    |
| PLIN2_R                 | GGACATGAGGTCATACGTGGAG                         | Primer used for quantitative real-time PCR                    |
| ACOX1_F                 | GGAACCTCACCTTCGAGGCTTG                         | Primer used for quantitative real-time PCR                    |
| ACOX1_R                 | TTCCCCTTAGTGATGAGCTGG                          | Primer used for quantitative real-time PCR                    |
| CPT1B_F                 | CCTGCTACATGGCAACTGCTA                          | Primer used for quantitative real-time PCR                    |
| CPT1B_R                 | AGAGGTGCCCAATGATGGGA                           | Primer used for quantitative real-time PCR                    |
| ACSF2_F                 | ATGGCTGTCTACGTCGGG                             | Primer used for quantitative real-time PCR                    |
| ACSF2_R                 | GACCATGCGATCCACCTCTC                           | Primer used for quantitative real-time PCR                    |
| ME1_F                   | CTGCTGACACGGAACCCTC                            | Primer used for quantitative real-time PCR                    |
| ME1_R                   | GATCTCCTGACTGTTGAAGGAAG                        | Primer used for quantitative real-time PCR                    |
| CFD_F                   | GACACCATCGACCACGACC                            | Primer used for quantitative real-time PCR                    |
| CFD_R                   | GCCACGTCGCAGAGAGTTC                            | Primer used for quantitative real-time PCR                    |
| IDH3A_F                 | GGACCTGGAGGAAAGTGGAT                           | Primer used for quantitative real-time PCR                    |
| IDH3A_R                 | GCTGCTATTGGGGTCTTCAA                           | Primer used for quantitative real-time PCR                    |
| $\beta$ -actin_F        | CATGCCATCCTGCGTCTGGA                           | Primer used for quantitative real-time PCR                    |
| $\beta$ -actin_R        | CCGTGGCCATCTCTTGCTCG                           | Primer used for quantitative real-time PCR                    |
