# Supplementary material
Source: PubMed Central journal article supplement (PMC6436616)
Supplement: NIHMS1011024-supplement-Supplemental_Figures_S1-S6__and_Tables_S1-S6.pdf [file NIHMS1011024-supplement-Supplemental_Figures_S1-S6__and_Tables_S1-S6.pdf]

**Supplemental Information**

**PPAR $\gamma$  Interaction with UBR5/ATMIN**

**Promotes DNA Repair**

**to Maintain Endothelial Homeostasis**

**Caiyun G. Li, Cathal Mahon, Nathaly M. Sweeney, Erik Verschueren, Vivek Kantamani, Dan Li, Jan K. Hennigs, David P. Marciano, Isabel Diebold, Ossama Abu-Halawa, Matthew Elliott, Silin Sa, Feng Guo, Lingli Wang, Aiqin Cao, Christophe Guignabert, Julie Sollier, Nils P. Nickel, Mark Kaschwich, Karlene A. Cimprich, and Marlene Rabinovitch**

1 **Supplementary Information**  
 2 **Figure S1**

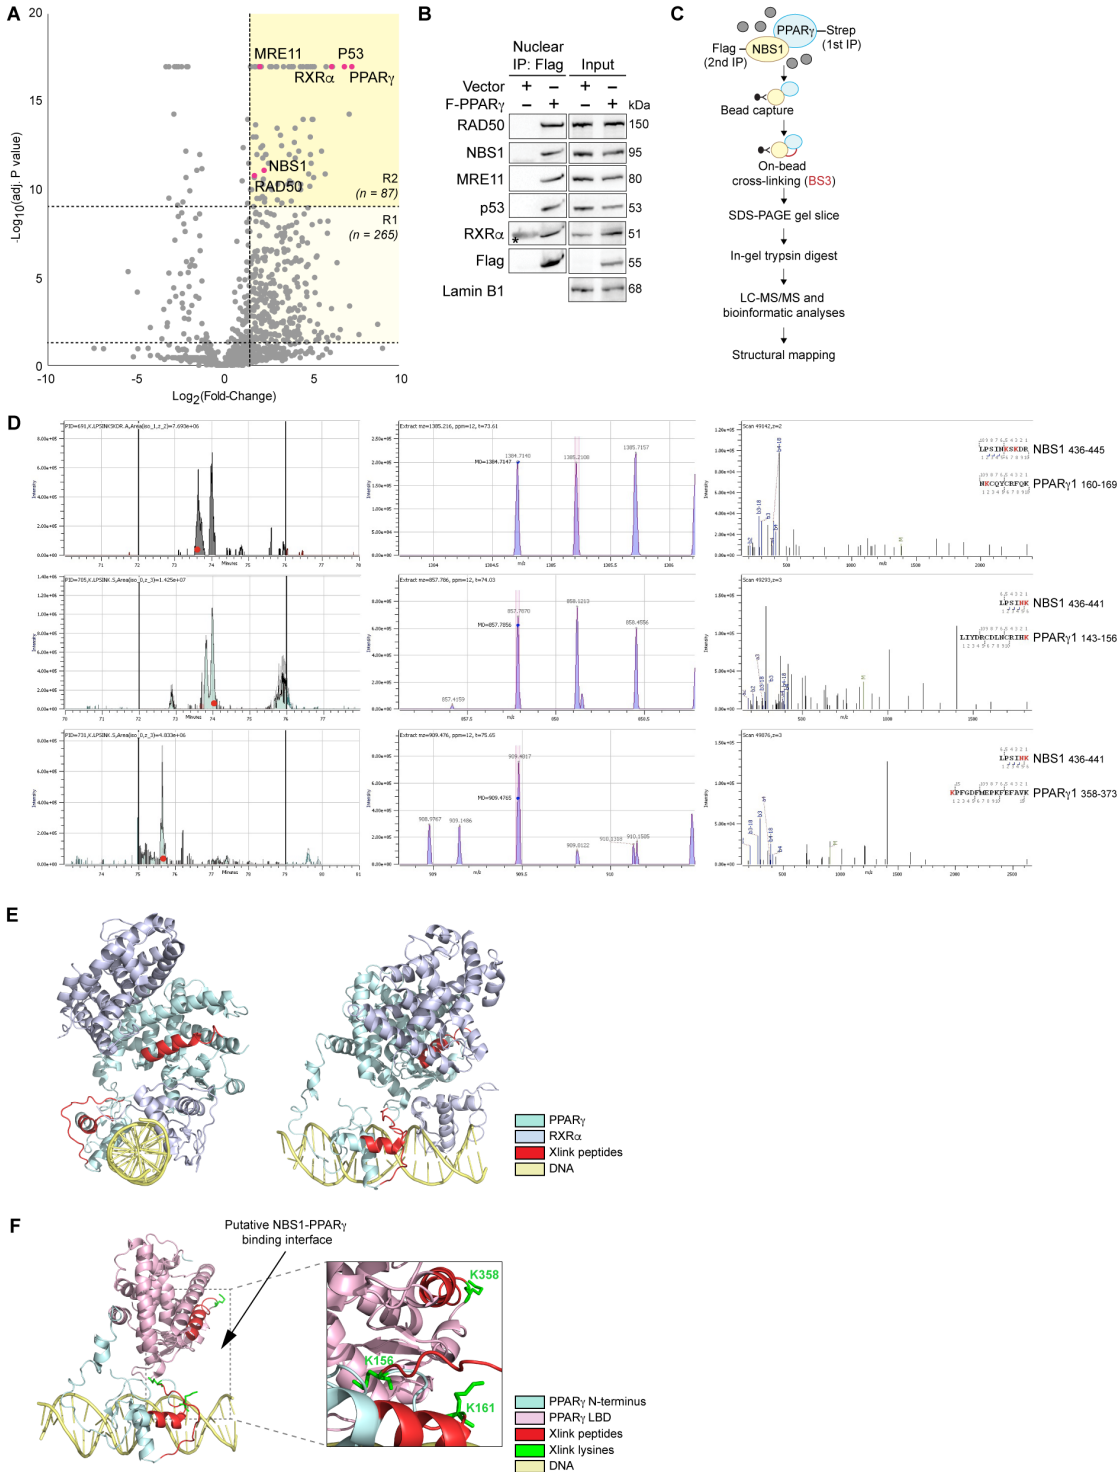

3 **Figure S1 PPAR $\gamma$  interacts with the MRE11-RAD50-NBS1 (MRN) complex via NBS1 in 293T cells. – Related**  
 4 **to Figure 1, Table S1-2.**

5 (A) AP-MS experiments yielded a volcano plot revealing 87 PPAR $\gamma$  high confidence interactors (R2) out of the 352  
 6 interactors (R1+R2). Four (in red) were validated in (C) Dotted lines represent cut-off at  $\text{Log}_2(\text{Fold-Change}) > 1.5$   
 7 and  $\text{Log}_{10}(\text{adj. P value}) \leq 0.05$  and  $1.0 \times 10^{-9}$ ). R1, region 1; R2, region 2, described in Results.  
 8

9 (B) Representative immunoblots of PPAR $\gamma$  interactions in 293T nuclear extracts.  
10 (C) Experimental set up of the BS3 crosslinking mass spectrometry (XL-MS) using tandem immunoprecipitation of  
11 Flag-NBS1 and PPAR $\gamma$ -Strep to determine NBS1 and PPAR $\gamma$  binding interface.  
12 (D) Raw MS/MS data of the identified crosslinked peptides from BS3 treated beads and trypsin-digested NBS1 and  
13 PPAR $\gamma$ . Amino acid positions of the peptides are as indicated. Analyses and methods are described in experimental  
14 procedures.  
15 (E) Structural mapping of the three PPAR $\gamma$  peptides (red) identified in (D) to PPAR $\gamma$  crystal structure (light green)  
16 obtained from PDB:3DZU. This structure depicts PPAR $\gamma$  and RXR $\alpha$  (blue) complex on DNA (yellow).  
17 (F) Putative NBS1-PPAR $\gamma$  binding interface as indicated by the locations of the three Xlink peptides (red). The  
18 Xlink lysines (K) are labeled as green in inset. PPAR $\gamma$  N-terminus is in light green, and its ligand-binding domain  
19 (LBD) is in pink.  
20  
21  
22  
23  
24  
25

26 **Figure S2**

**A**

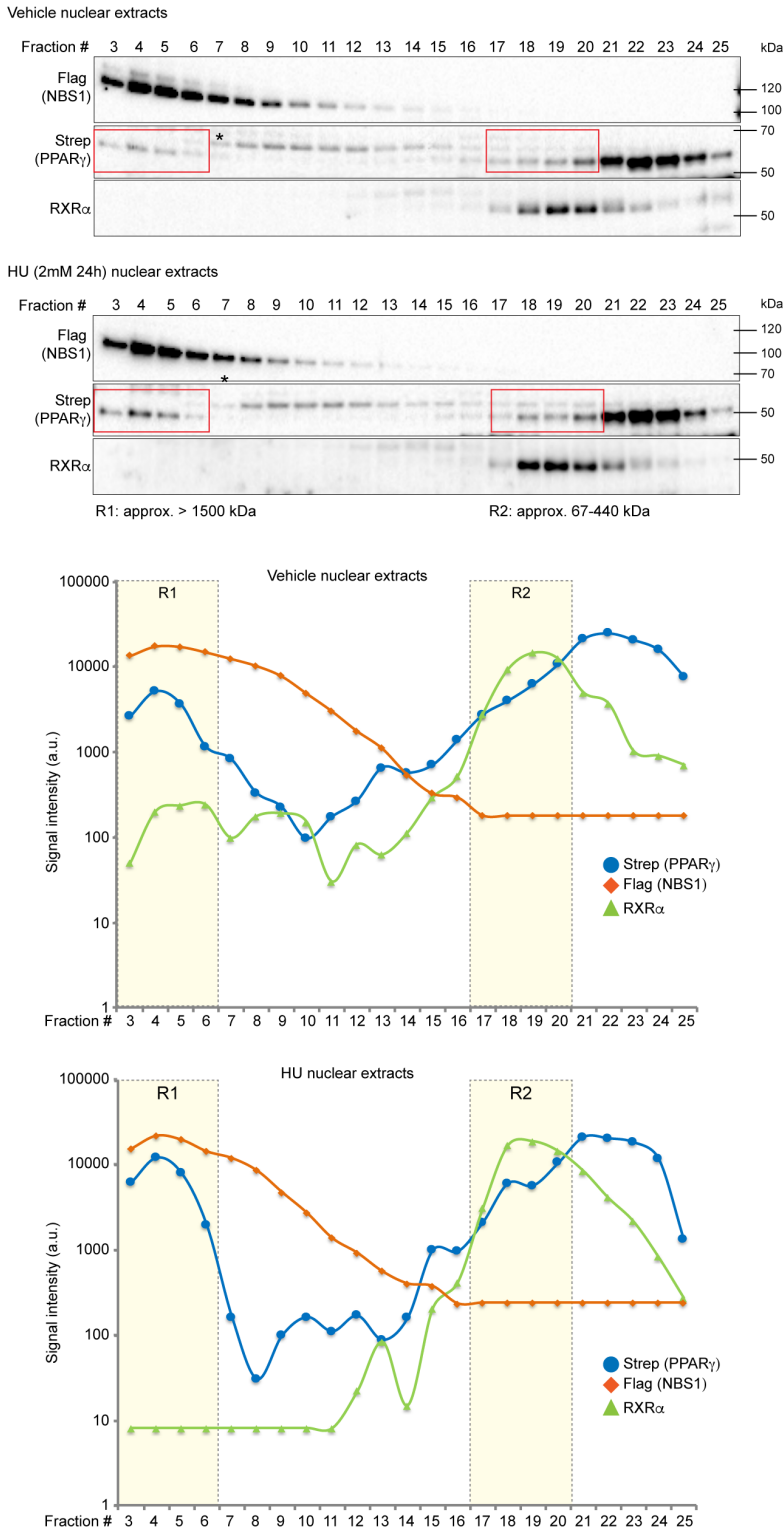

**B**

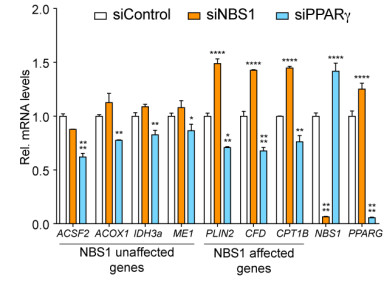

**C**

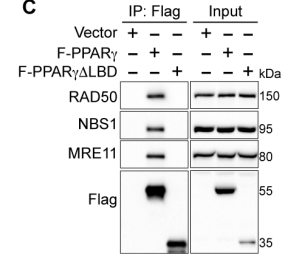

**D**

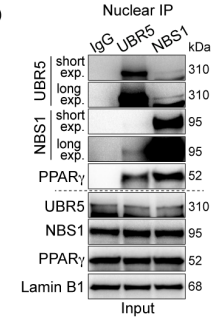

**E**

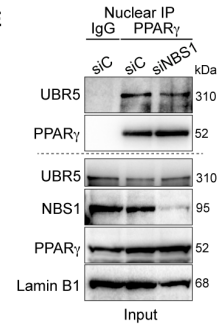

27  
28  
29

**Figure S2 Nuclear PPAR $\gamma$  and NBS1 are in an independent cellular pool from PPAR $\gamma$  and RXR $\alpha$ . – Related to Figure 1.**

30 (A) 293T nuclear extracts expressing PPAR $\gamma$ -2xStrep and Flag-NBS1 with and without HU treatment were analyzed  
31 by size-exclusion chromatography on a Superose 6 gel filtration column. Proteins eluted from fractions #3-25 were  
32 further analyzed by immunoblots to detect PPAR $\gamma$  (anti-Strep), NBS1 (ant-Flag) and RXR $\alpha$  (anti-RXR $\alpha$ ). Graphs  
33 indicate densitometry results of each protein. Region 1 and 2 (R1, R2) are highlighted in red (in immunoblots) and  
34 yellow (in graphs) to indicate PPAR $\gamma$  eluted fractions. Since PPAR $\gamma$ -2xStrep is approximately (approx.) a 60 kDa  
35 protein (analyzed by silver staining in Fig. 1e), PPAR $\gamma$  eluted from fraction #21 (approx. 67 kDa) might be the  
36 excess monomeric form (due to overexpression). \* indicates non-specific band.

37 (B) mRNA expression of PPAR $\gamma$  target genes with NBS1 or PPAR $\gamma$  depletion. mRNA expression was normalized to  
38  *$\beta$ -actin* mRNA.

39 (C) Representative immunoblots of interactions between Flag-PPAR $\gamma$  (F-PPAR $\gamma$ ) without the ligand binding domain  
40 ( $\Delta$ LBD) and MRN.

41 (E) Representative immunoblots of endogenous co-immunoprecipitation (co-IP) between nuclear UBR5, NBS1 and  
42 PPAR $\gamma$  using anti-UBR5 or anti-NBS1.

43 (F) Representative immunoblots of endogenous IP of PPAR $\gamma$  with UBR5 with NBS1 depletion (siNBS1).

44 Error bars, mean  $\pm$  s.e.m. (B). siC, siControl. Two-way ANOVA test with Fisher's LSD test (B). \*, P < 0.05, \*\*, P <  
45 0.01, \*\*\*, P < 0.001, \*\*\*\*, P < 0.0001.

46

47 siC, siControl, siP $\gamma$ , siPPAR $\gamma$ , siU5, siUBR5. Error bars, mean  $\pm$  s.e.m. (B). siC, siControl. Two-way ANOVA test  
48 with Fisher's LSD test (A-C). One-way ANOVA test with Fisher's LSD test (G). \*, P < 0.05, \*\*, P < 0.01, \*\*\*, P <  
49 0.001, \*\*\*\*, P < 0.0001.

50 **Figure S3**

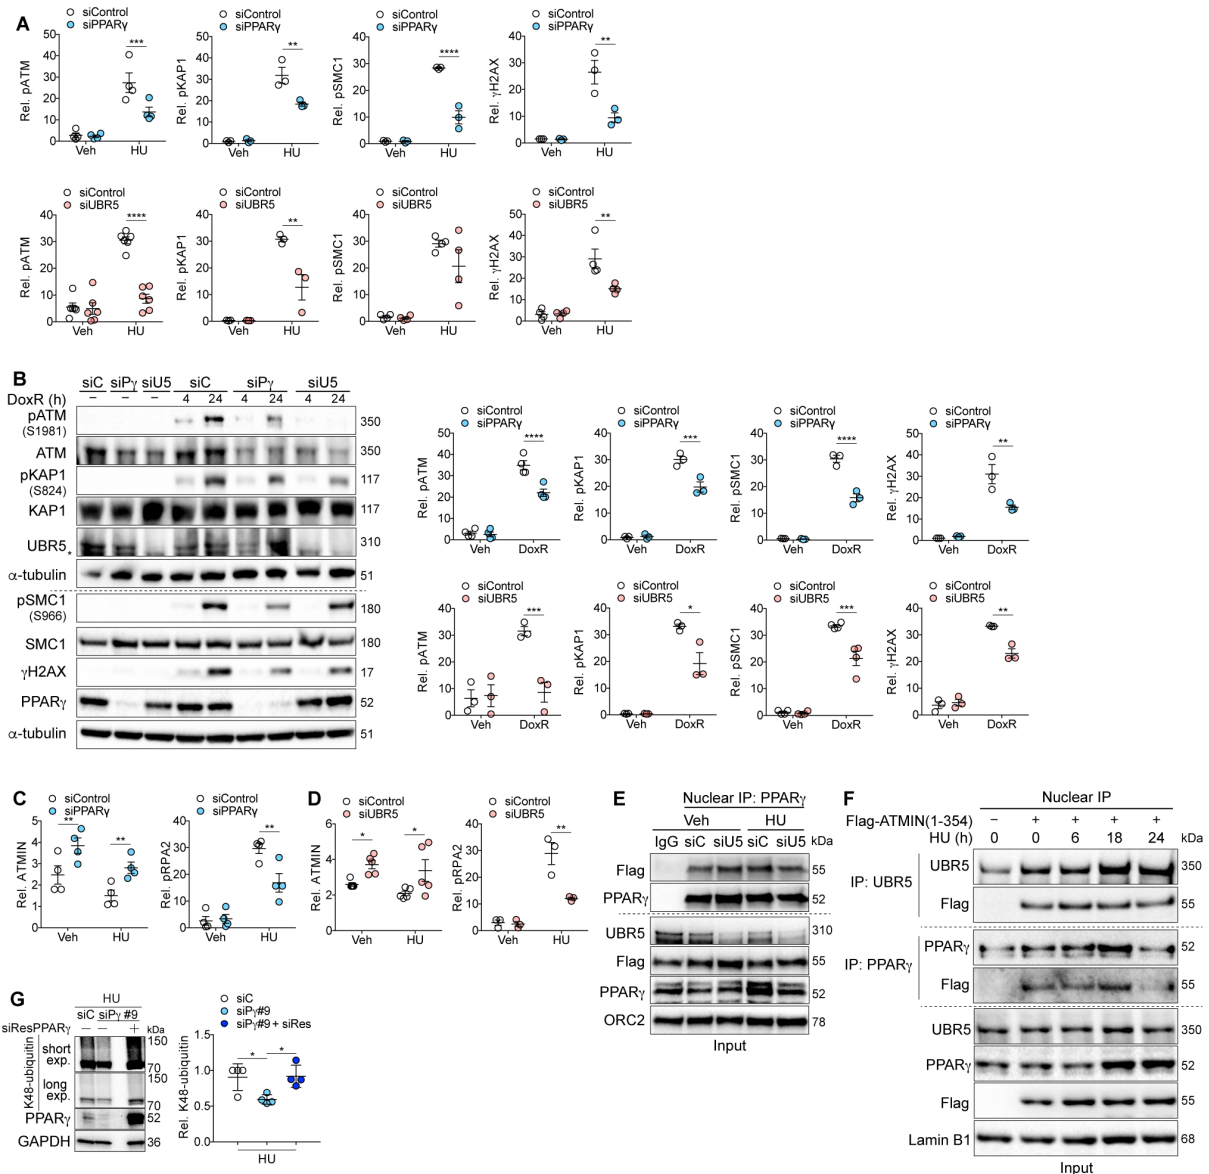

51  
 52 **Figure S3 PPAR $\gamma$  promotes ATM signaling by increasing ATMIN ubiquitination in 293T cells. – Related to**  
 53 **Figure 2.**  
 54 (A) Densitometry of HU-induced ATM signaling pathways, pATM, pKAP1, pSMC1,  $\gamma$ H2AX levels with PPAR $\gamma$  or  
 55 UBR5 depletion.  
 56 (B) Representative immunoblots and densitometry data of DoxR-induced ATM signaling pathways, pATM, pKAP1,  
 57 pSMC1,  $\gamma$ H2AX levels with PPAR $\gamma$  or UBR5 depletions.  
 58 (C) Densitometry data of HU-induced ATMIN and pRPA2 with PPAR $\gamma$  depletion.  
 59 (D) Densitometry data of HU-induced ATMIN and pRPA2 with UBR5 depletion.  
 60 (E) Representative immunoblots of endogenous IP of nuclear PPAR $\gamma$  with Flag-ATMIN (aa1-354) with UBR5  
 61 depletion.  
 62 (F) Representative immunoblots of endogenous IP of nuclear PPAR $\gamma$  or UBR5 with Flag-ATMIN (aa1-354) with  
 63 HU. The samples were harvested at the indicated time after HU treatment and lysates were separately incubated with  
 64 anti-PPAR $\gamma$  or anti-UBR5.  
 65 (G) Representative immunoblots and densitometry data of restoration of K48-linked polyubiquitins with siRNA  
 66 (siPPAR $\gamma$ #9)-resistant PPAR $\gamma$  overexpression.

67 **Figure S4**

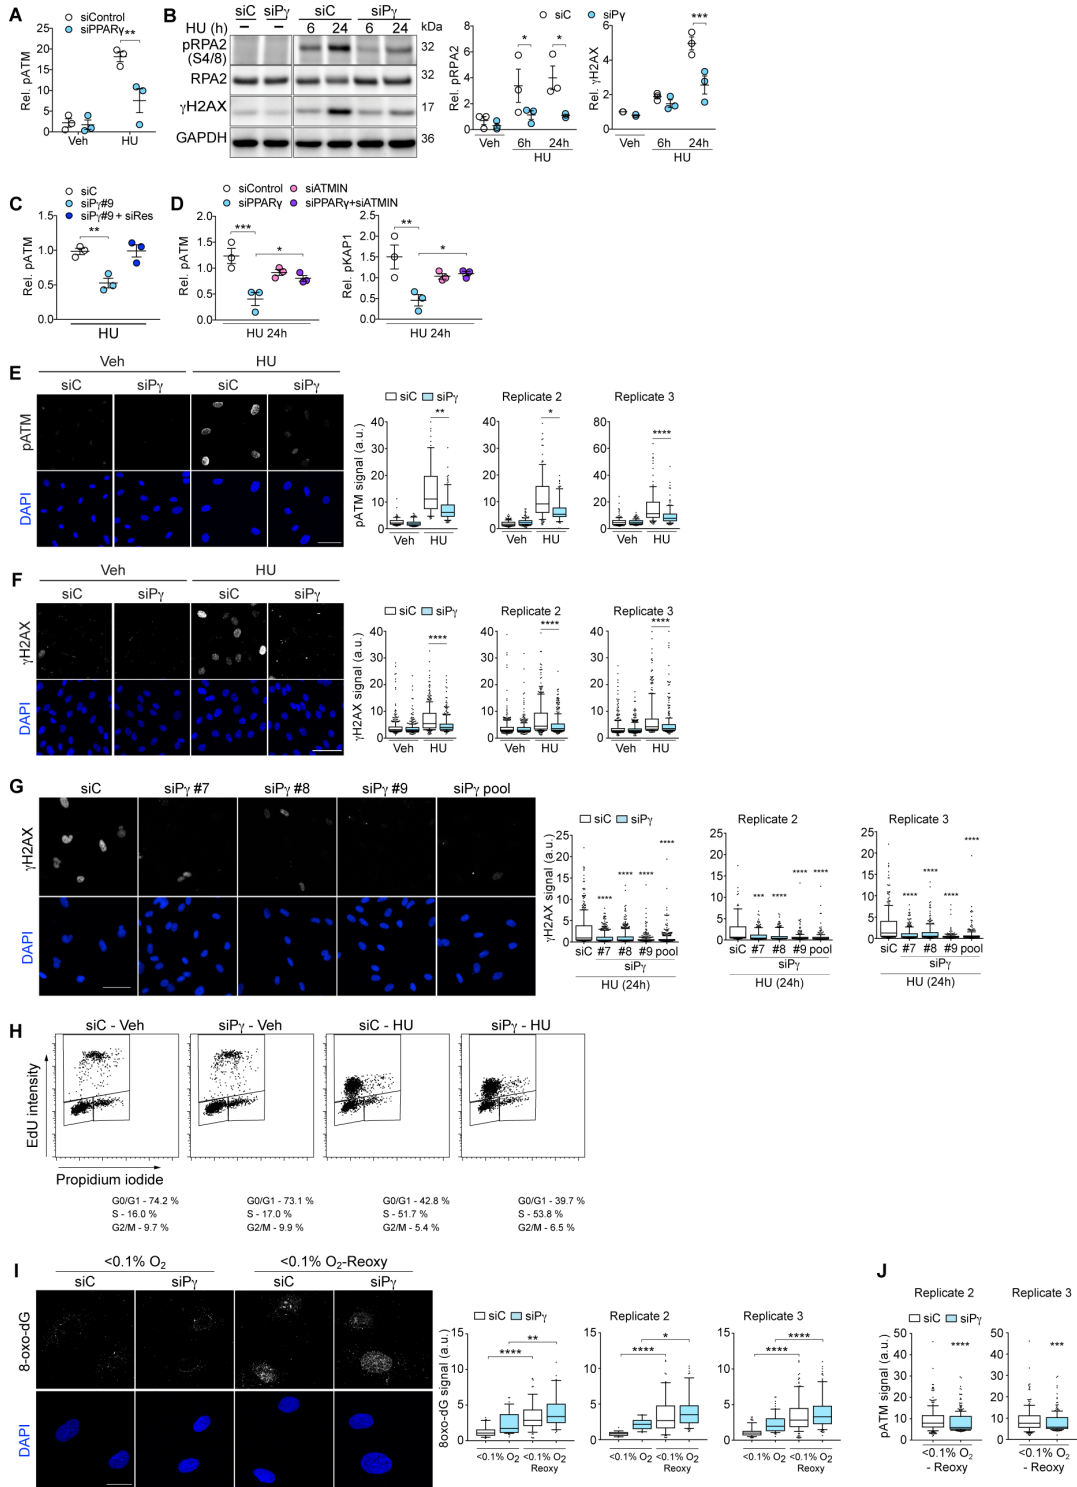

68  
 69 **Fig. S4 PPAR $\gamma$  depletion suppresses pATM and  $\gamma$ H2AX foci formation with various DNA damage stimuli and**  
 70 **has no effects on cell cycle in primary endothelial cells. – Related to Figure 3.**  
 71 (A) Densitometry data of HU-induced pATM with PPAR $\gamma$  depletion in PAEC.  
 72 (B) Representative immunoblots and densitometry data of HU-induced pRPA2 (S4/8) and  $\gamma$ H2AX protein levels  
 73 with PPAR $\gamma$  depletion in PAEC.

74 (C) Densitometry data of restoration of pATM with siRNA-resistant PPAR $\gamma$  (siResPPAR $\gamma$ ) overexpression in  
75 HUVEC.  
76 (D) Densitometry data of HU-induced pATM and pKAP1 with PPAR $\gamma$  or/and ATMIN depletion in PAEC.  
77 (E) Confocal microscopy and triplicate quantitative data of effects of PPAR $\gamma$  depletion on pATM foci formation  
78 upon HU (24 hours) treatment in PAEC.  
79 (F) Confocal microscopy and triplicate quantitative data of effects of PPAR $\gamma$  depletion on  $\gamma$ H2AX foci formation  
80 upon HU (24 hours) treatment in PAEC.  
81 (G) Confocal microscopy and triplicate quantitative data of effects of PPAR $\gamma$  depletion by multiple siRNAs on  
82  $\gamma$ H2AX foci formation upon HU (24 hours) treatment in PAEC. PPAR $\gamma$  siRNAs (#7-9) are three out of the four  
83 individual PPAR $\gamma$  siRNAs used in the siP $\gamma$  pool.  
84 (H) Flow cytometry analysis of EdU incorporation shows cell cycle profiles of cells with PPAR $\gamma$  depletion and with  
85 HU (24 hours) treatment in PAEC.  
86 (I) Confocal microscopy and triplicate quantitative data of 8-oxo-dG foci upon hypoxia (24 hours) (< 0.1% O<sub>2</sub>) and  
87 10 min reoxygenation (Reoxy) in PAEC.  
88 (J) Replicate quantitative data of pATM foci with hypoxia-reoxygenation as described in (I).  
89 siC, siControl, siP $\gamma$ , siPPAR $\gamma$ . Error bars, mean  $\pm$  s.e.m. The line in the box-and-whisker plots marks the median and  
90 whiskers correspond to the 10<sup>th</sup> to 90<sup>th</sup> percentiles (E-G, I-J). Two-way ANOVA with Fisher's LSD test (A-D).  
91 Kruskal-Wallis ANOVA test with Dunn's test (E-G, I). Unpaired t test (J). \*, P < 0.05, \*\*, P < 0.01, \*\*\*, P < 0.001;  
92 \*\*\*\*, P < 0.0001. Scale bars, E-G, 50 $\mu$ m; I, 20 $\mu$ m.  
93



94 **Figure S5**

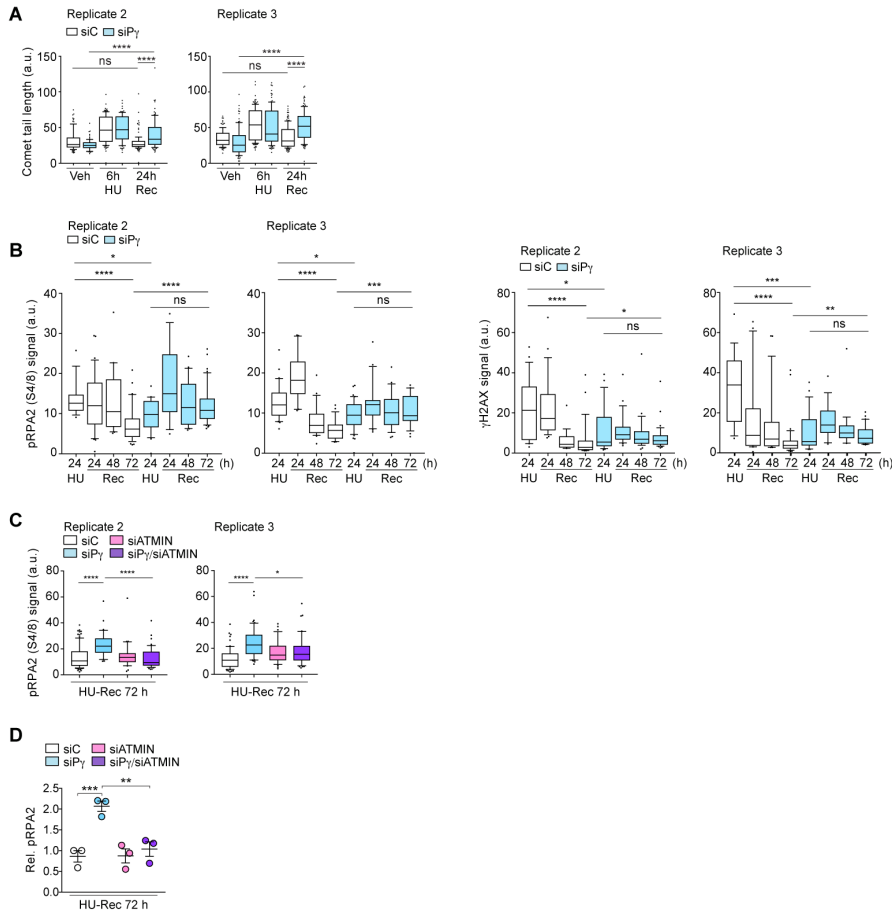

95  
 96 **Fig. S5 PPAR $\gamma$  depletion leads to persistent pRPA2 and  $\gamma$ H2AX foci after HU-induced damage which are**  
 97 **resolved by ATMIN depletion in PAEC. – Related to Figure 4.**

98 (A) Replicate quantitative data of extended comet tail lengths in PPAR $\gamma$  depleted cells after HU (6 hours) was  
 99 removed (recovery for 24 hours).

100 (B) Replicate quantitative data of pRPA2 and  $\gamma$ H2AX foci in PPAR $\gamma$  depleted cells after HU (24 hours) was  
 101 removed. Cells were fixed at various recovery time points as indicated.

102 (C) Replicate quantitative data of resolution of pRPA2 foci with ATMIN depletion in addition to PPAR $\gamma$  depletion.

103 (D) Densitometry data show restoration of pRPA2 protein levels with ATMIN depletion in addition to PPAR $\gamma$   
 104 depletion.

105 siC, siControl, siP $\gamma$ , siPPAR $\gamma$ . Error bars, mean  $\pm$  s.e.m. The line in the box-and-whisker plots marks the median and  
 106 whiskers correspond to the 10<sup>th</sup> to 90<sup>th</sup> percentiles (A-C). Kruskal–Wallis ANOVA test with Dunn’s test (A-C).

107 Two-way ANOVA with Fisher’s LSD test (D). \*, P < 0.05, \*\*, P < 0.01, \*\*\*, P < 0.001; \*\*\*\*, P < 0.0001, ns, not  
 108 significant.

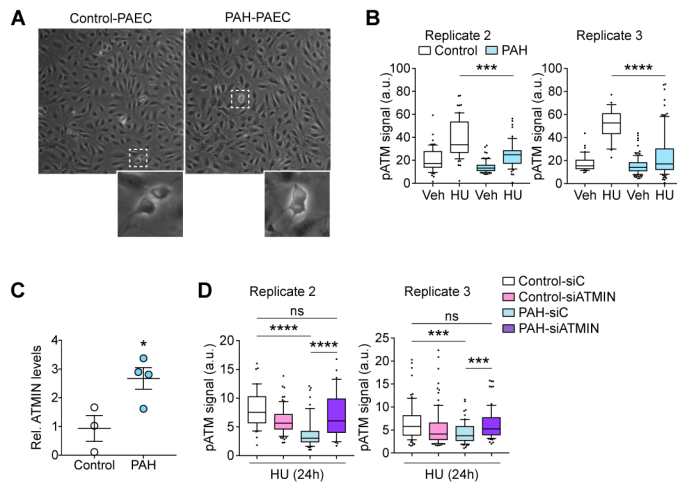

110  
 111 **Fig. S6 PPAR $\gamma$  and ATMIN axis is impaired in PAEC from PAH patients. – Related to Figure 5.**  
 112 (A) Phase-contrast microscopy shows healthy primary PAEC cultures established from explanted lungs of control  
 113 (unused donors) and PAH patient. Inserts indicate mitotic cells from the dotted square.  
 114 (B) Replicate quantitative data of HU-induced pATM levels in control and PAH-PAEC.  
 115 (C) Densitometry data of ATMIN protein levels in control and PAH-PAEC.  
 116 (D) Replicate quantitative data of pATM levels in control and PAH-PAEC with ATMIN depletion.  
 117 siC, siControl, siP $\gamma$ , siPPAR $\gamma$ . Error bars, mean  $\pm$  s.e.m. The line in the box-and-whisker plots marks the median and  
 118 whiskers correspond to the 10<sup>th</sup> to 90<sup>th</sup> percentiles (B,D). Kruskal–Wallis ANOVA test with Dunn’s test (B,D).  
 119 Unpaired t test (C). \*, P < 0.05, \*\*\*, P < 0.001; \*\*\*\*, P < 0.0001, ns, not significant.  
 120

**Table S1 High-confidence PPAR $\gamma$  interactors identified from AP-MS. – Related to Figure 1; Figure S1.**

| Uniprot ID | Log2FC | Adj. P value | Gene name     | Protein name                                                      |
|------------|--------|--------------|---------------|-------------------------------------------------------------------|
| P37231     | 7.32   | 0            | <b>PPARG</b>  | Peroxisome proliferator-activated receptor gamma                  |
| P04637     | 6.9    | 0            | TP53          | Cellular tumor antigen p53                                        |
| P11142     | 6.22   | 0            | HSPA8         | Heat shock cognate 71 kDa protein                                 |
| O95816     | 6.22   | 0            | BAG2          | BAG family molecular chaperone regulator 2                        |
| P19793     | 6.17   | 0            | <b>RXRA</b>   | Retinoic acid receptor RXR-alpha                                  |
| P23396     | 5.86   | 0            | RPS3          | 40S ribosomal protein S3                                          |
| P52272     | 5.18   | 0            | HNRNPM        | Heterogeneous nuclear ribonucleoprotein M                         |
| P31943     | 5.08   | 0            | HNRNPH1       | Heterogeneous nuclear ribonucleoprotein H, N-terminally processed |
| P49411     | 4.97   | 0            | TUFM          | Elongation factor Tu, mitochondrial                               |
| P49368     | 4.82   | 0            | CCT3          | T-complex protein 1 subunit gamma                                 |
| Q92841     | 4.74   | 0            | DDX17         | Probable ATP-dependent RNA helicase DDX17                         |
| P08107     | 4.53   | 0            | HSPA1B        | Heat shock 70 kDa protein 1A/1B                                   |
| P17987     | 4.38   | 0            | TCP1          | T-complex protein 1 subunit alpha                                 |
| P55072     | 3.98   | 0            | VCP           | Transitional endoplasmic reticulum ATPase                         |
| Q9UL15     | 3.91   | 0            | BAG5          | BAG family molecular chaperone regulator 5                        |
| Q08211     | 3.87   | 0            | DHX9          | ATP-dependent RNA helicase A                                      |
| P18669     | 3.74   | 0            | PGAM1         | Phosphoglycerate mutase 1                                         |
| P48047     | 3.43   | 0            | ATP5O         | ATP synthase subunit O, mitochondrial                             |
| P52209     | 3.43   | 0            | PGD           | 6-phosphogluconate dehydrogenase, decarboxylating                 |
| Q9Y265     | 3.05   | 0            | RUVBL1        | RuvB-like 1                                                       |
| Q9Y230     | 3.03   | 0            | RUVBL2        | RuvB-like 2                                                       |
| P38646     | 3      | 0            | HSPA9         | Stress-70 protein, mitochondrial                                  |
| P11021     | 2.74   | 0            | HSPA5         | 78 kDa glucose-regulated protein                                  |
| P13796     | 2.65   | 0            | LCP1          | Plastin-2                                                         |
| P50990     | 2.65   | 0            | CCT8          | T-complex protein 1 subunit theta                                 |
| O14830     | 2.16   | 0            | PPEF2         | Serine/threonine-protein phosphatase with EF-hands 2              |
| P47929     | 2.11   | 0            | LGALS7        | Galectin-7                                                        |
| P49959     | 2.08   | 0            | <b>MRE11A</b> | Meiotic recombination 11 MRE11A                                   |
| Q02880     | 2      | 0            | TOP2B         | DNA topoisomerase 2-beta                                          |
| Q9H0A0     | 1.83   | 0            | NAT10         | N-acetyltransferase 10                                            |
| Q9Y490     | 1.79   | 0            | TLN1          | Talin-1                                                           |
| P15927     | 1.58   | 0            | RPA2          | Replication protein A 32 kDa subunit                              |
| P49916     | 1.55   | 0            | LIG3          | DNA ligase 3                                                      |
| Q9UBQ0     | 1.54   | 0            | VPS29         | Vacuolar protein sorting-associated protein 29                    |
| P62241     | 7.17   | 5.57E-15     | RPS8          | 40S ribosomal protein S8                                          |
| Q86U86     | 5.1    | 1.02E-14     | PBRM1         | Protein polybromo-1                                               |
| Q7Z2W4     | 5.06   | 1.02E-14     | ZC3HAV1       | Zinc finger CCCH-type antiviral protein 1                         |
| Q92945     | 4.55   | 1.02E-14     | KHSRP         | Far upstream element-binding protein 2                            |
| Q6Y7W6     | 1.83   | 2.01E-14     | GIGYF2        | PERQ amino acid-rich with GYF domain-containing protein 2         |
| P33993     | 4.09   | 2.95E-14     | MCM7          | DNA replication licensing factor MCM7                             |
| P17066     | 3.06   | 3.37E-14     | HSPA6         | Heat shock 70 kDa protein 6                                       |
| Q13263     | 3.26   | 8.51E-14     | TRIM28        | Transcription intermediary factor 1-beta                          |
| Q9H583     | 1.86   | 1.02E-13     | HEATR1        | HEAT repeat-containing protein 1, N-terminally processed          |
| P42704     | 1.71   | 1.05E-13     | LRPPRC        | Leucine-rich PPR motif-containing protein, mitochondrial          |
| P62906     | 4.96   | 1.07E-13     | RPL10A        | 60S ribosomal protein L10a                                        |
| Q14151     | 4.04   | 2.02E-13     | SAFB2         | Scaffold attachment factor B2                                     |
| Q15393     | 3.32   | 3.40E-13     | SF3B3         | Splicing factor 3B subunit 3                                      |
| P78316     | 2.24   | 3.40E-13     | NOP14         | Nucleolar protein 14                                              |
| P62424     | 2.14   | 3.78E-13     | RPL7A         | 60S ribosomal protein L7a                                         |

|        |      |          |          |                                                                                               |
|--------|------|----------|----------|-----------------------------------------------------------------------------------------------|
| P32969 | 5.6  | 6.05E-13 | RPL9P7   | 60S ribosomal protein L9                                                                      |
| P78347 | 4.3  | 6.89E-13 | GTF2I    | General transcription factor II-I                                                             |
| Q99615 | 4.96 | 9.02E-13 | DNAJC7   | DnaJ homolog subfamily C member 7                                                             |
| Q15029 | 3.75 | 9.05E-13 | EFTUD2   | 116 kDa U5 small nuclear ribonucleoprotein component                                          |
| Q9NVP1 | 2.43 | 9.05E-13 | DDX18    | ATP-dependent RNA helicase DDX18                                                              |
| O75368 | 1.91 | 1.10E-12 | SH3BGRL  | SH3 domain-binding glutamic acid-rich-like protein                                            |
| O95786 | 2.4  | 1.11E-12 | DDX58    | Probable ATP-dependent RNA helicase DDX58                                                     |
| P28702 | 4.1  | 1.50E-12 | RXRβ     | Retinoic acid receptor RXR-beta                                                               |
| P61978 | 2.25 | 1.66E-12 | HNRNPK   | Heterogeneous nuclear ribonucleoprotein K                                                     |
| Q96EY1 | 5.01 | 2.90E-12 | DNAJA3   | DnaJ homolog subfamily A member 3, mitochondrial                                              |
| Q8N1F7 | 2.57 | 3.12E-12 | NUP93    | Nuclear pore complex protein Nup93                                                            |
| O60934 | 2.32 | 8.83E-12 | NBS1     | Nibrin                                                                                        |
| O00231 | 4.86 | 1.18E-11 | PSMD11   | 26S proteasome non-ATPase regulatory subunit 11                                               |
| Q12906 | 5.8  | 1.22E-11 | ILF3     | Interleukin enhancer-binding factor 3                                                         |
| Q92878 | 1.77 | 1.47E-11 | RAD50    | DNA repair protein RAD50                                                                      |
| O60264 | 1.76 | 2.00E-11 | SMARCA5  | SWI/SNF-related matrix-associated actin-dependent regulator of chromatin subfamily A member 5 |
| O15042 | 5.15 | 2.02E-11 | U2SURP   | U2 snRNP-associated SURP motif-containing protein                                             |
| O76021 | 2.28 | 2.53E-11 | RSL1D1   | Ribosomal L1 domain-containing protein 1                                                      |
| P62191 | 3.77 | 3.35E-11 | PSMC1    | 26S protease regulatory subunit 4                                                             |
| P46087 | 3.91 | 3.67E-11 | NOP2     | Probable 28S rRNA (cytosine(4447)-C(5))-methyltransferase                                     |
| Q9Y2R4 | 3.68 | 4.88E-11 | DDX52    | Probable ATP-dependent RNA helicase DDX52                                                     |
| Q9BVJ6 | 4.41 | 4.97E-11 | UTP14A   | U3 small nucleolar RNA-associated protein 14 homolog A                                        |
| O15144 | 2.26 | 5.08E-11 | ARPC2    | Actin-related protein 2/3 complex subunit 2                                                   |
| Q12905 | 3.1  | 5.40E-11 | ILF2     | Interleukin enhancer-binding factor 2                                                         |
| P62701 | 4.93 | 5.77E-11 | RPS4X    | 40S ribosomal protein S4, X isoform                                                           |
| Q9BZE4 | 2.7  | 7.08E-11 | GTPBP4   | Nucleolar GTP-binding protein 1                                                               |
| O75367 | 2.76 | 9.21E-11 | H2AFY    | Core histone macro-H2A.1                                                                      |
| P15924 | 1.62 | 9.21E-11 | DSP      | Desmoplakin                                                                                   |
| Q9Y2X3 | 4.4  | 9.27E-11 | NOP58    | Nucleolar protein 58                                                                          |
| Q8WVV4 | 1.54 | 1.01E-10 | POF1B    | Protein POF1B                                                                                 |
| P17931 | 2.23 | 2.46E-10 | LGALS3   | Galectin-3                                                                                    |
| Q9BVP2 | 2.07 | 3.14E-10 | GNL3     | Guanine nucleotide-binding protein-like 3                                                     |
| P26038 | 2.36 | 3.16E-10 | MSN      | Moesin                                                                                        |
| P06702 | 1.91 | 3.16E-10 | S100A9   | Protein S100-A9                                                                               |
| P07900 | 3.08 | 3.80E-10 | HSP90AA1 | Heat shock protein HSP 90-alpha                                                               |
| P31689 | 3.87 | 4.49E-10 | DNAJA1   | DnaJ homolog subfamily A member 1                                                             |
| O15511 | 2.34 | 5.01E-10 | ARPC5    | Actin-related protein 2/3 complex subunit 5                                                   |
| O15160 | 3.33 | 5.70E-10 | POLR1C   | DNA-directed RNA polymerases I and III subunit RPAC1                                          |
| O43818 | 1.72 | 9.22E-10 | RRP9     | U3 small nucleolar RNA-interacting protein 2                                                  |

122  
123 Proteins co-purified with Flag-PPAR $\gamma$  from 293T nuclear extracts were detected by mass spectrometry and analyzed  
124 as described in Experimental Procedures. Proteins in red were validated in Fig. 1c. Log<sub>2</sub>FC (Fold-Change) indicates  
125 the fold enrichment of proteins immunoprecipitated from Flag-PPAR $\gamma$  expressing cells as compared to Flag-vector  
126 expressing cells. The adjusted (adj.) P values are indicated and the data was obtained from four independent  
127 experiments. Proteins are listed by their adj. P values.

128  
129  
130

**Table S2**  
**Biological functions associated with the high-confidence PPAR $\gamma$  interactome. – Related to Figure 1; Figure S1.**

| <b>Uniprot ID</b> | <b>Gene name</b> | <b>Biological function name</b>           |
|-------------------|------------------|-------------------------------------------|
| O15144            | ARPC2            | Actin cytoskeleton organization           |
| O15511            | ARPC5            | Actin cytoskeleton organization           |
| P47929            | LGALS7           | Cell-cell interaction                     |
| Q8WVV4            | POF1B            | Cell-cell interaction                     |
| Q9Y490            | TLN1             | Cell-cell interaction                     |
| P48047            | ATP5O            | Cellular metabolism                       |
| O95816            | BAG2             | Cellular metabolism                       |
| Q9UL15            | BAG5             | Cellular metabolism                       |
| P18669            | PGAM1            | Cellular metabolism                       |
| P52209            | PGD              | Cellular metabolism                       |
| P37231            | PPARG            | Cellular metabolism                       |
| P19793            | RXRA             | Cellular metabolism                       |
| P28702            | RXRB             | Cellular metabolism                       |
| P49411            | TUFM             | Cellular metabolism                       |
| Q9UBQ0            | VPS29            | Cellular metabolism                       |
| Q08211            | DHX9             | DNA damage response and replication       |
| P31689            | DNAJA1           | DNA damage response and replication       |
| Q96EY1            | DNAJA3           | DNA damage response and replication       |
| O75367            | H2AFY            | DNA damage response and replication       |
| P07900            | HSP90AA1         | DNA damage response and replication       |
| P08107            | HSPA1B           | DNA damage response and replication       |
| P11142            | HSPA8            | DNA damage response and replication       |
| Q92945            | KHSRP            | DNA damage response and replication       |
| P49916            | LIG3             | DNA damage response and replication       |
| P42704            | LRPPRC           | DNA damage response and replication       |
| P33993            | MCM7             | DNA damage response and replication       |
| P49959            | MRE11A           | DNA damage response and replication       |
| O60934            | NBN              | DNA damage response and replication       |
| Q8N1F7            | NUP93            | DNA damage response and replication       |
| Q86U86            | PBRM1            | DNA damage response and replication       |
| P62191            | PSMC1            | DNA damage response and replication       |
| O00231            | PSMD11           | DNA damage response and replication       |
| Q92878            | RAD50            | DNA damage response and replication       |
| P15927            | RPA2             | DNA damage response and replication       |
| Q9Y265            | RUVBL1           | DNA damage response and replication       |
| Q9Y230            | RUVBL2           | DNA damage response and replication       |
| Q14151            | SAFB2            | DNA damage response and replication       |
| O60264            | SMARCA5          | DNA damage response and replication       |
| Q02880            | TOP2B            | DNA damage response and replication       |
| P04637            | TP53             | DNA damage response and replication       |
| Q13263            | TRIM28           | DNA damage response and replication       |
| P55072            | VCP              | DNA damage response and replication       |
| O95786            | DDX58            | Innate immune response                    |
| P13796            | LCPI             | Innate immune response                    |
| P17931            | LGALS3           | Innate immune response                    |
| P06702            | S100A9           | Innate immune response                    |
| Q7Z2W4            | ZC3HAV1          | Innate immune response                    |
| Q92841            | DDX17            | mRNA metabolic process and RNA processing |
| Q9NVP1            | DDX18            | mRNA metabolic process and RNA processing |
| Q9Y2R4            | DDX52            | mRNA metabolic process and RNA processing |

|        |         |                                           |
|--------|---------|-------------------------------------------|
| Q15029 | EFTUD2  | mRNA metabolic process and RNA processing |
| Q6Y7W6 | GIGYF2  | mRNA metabolic process and RNA processing |
| Q9BVP2 | GNL3    | mRNA metabolic process and RNA processing |
| Q9BZE4 | GTPBP4  | mRNA metabolic process and RNA processing |
| Q9H583 | HEATR1  | mRNA metabolic process and RNA processing |
| P31943 | HNRNPH1 | mRNA metabolic process and RNA processing |
| P61978 | HNRNPK  | mRNA metabolic process and RNA processing |
| P52272 | HNRNPM  | mRNA metabolic process and RNA processing |
| Q12905 | ILF2    | mRNA metabolic process and RNA processing |
| Q12906 | ILF3    | mRNA metabolic process and RNA processing |
| Q9H0A0 | NAT10   | mRNA metabolic process and RNA processing |
| P78316 | NOP14   | mRNA metabolic process and RNA processing |
| P46087 | NOP2    | mRNA metabolic process and RNA processing |
| Q9Y2X3 | NOP58   | mRNA metabolic process and RNA processing |
| P62906 | RPL10A  | mRNA metabolic process and RNA processing |
| P62424 | RPL7A   | mRNA metabolic process and RNA processing |
| P32969 | RPL9P7  | mRNA metabolic process and RNA processing |
| P23396 | RPS3    | mRNA metabolic process and RNA processing |
| P62701 | RPS4X   | mRNA metabolic process and RNA processing |
| P62241 | RPS8    | mRNA metabolic process and RNA processing |
| O43818 | RRP9    | mRNA metabolic process and RNA processing |
| O76021 | RSL1D1  | mRNA metabolic process and RNA processing |
| Q15393 | SF3B3   | mRNA metabolic process and RNA processing |
| O15042 | U2SURP  | mRNA metabolic process and RNA processing |
| Q9BVJ6 | UTP14A  | mRNA metabolic process and RNA processing |
| P49368 | CCT3    | Protein folding                           |
| P50990 | CCT8    | Protein folding                           |
| Q99615 | DNAJC7  | Protein folding                           |
| P15924 | DSP     | Protein folding                           |
| P11021 | HSPA5   | Protein folding                           |
| P17066 | HSPA6   | Protein folding                           |
| P38646 | HSPA9   | Protein folding                           |
| P26038 | MSN     | Protein folding                           |
| P17987 | TCP1    | Protein folding                           |
| P78347 | GTF2I   | NA                                        |
| O15160 | POLR1C  | NA                                        |
| O14830 | PPEF2   | NA                                        |
| O75368 | SH3BGRL | NA                                        |

131  
132  
133  
134

Biological functions enriched among the top ranked 87 PPAR $\gamma$  interactors defined in Supplementary Table 1. NA, not available.

135 **Table S3**  
 136 **Tandem affinity purification identified proteins interacting with PPAR $\gamma$  and NBS1 in unperturbed cells. –**  
 137 **Related to Figure 1.**

| Uniprot ID | Log <sub>2</sub> FC | Adj. P value | Gene name | Protein name                                                         |
|------------|---------------------|--------------|-----------|----------------------------------------------------------------------|
| O60934     | 6.24                | 0            | NBS1      | Nibrin                                                               |
| P37231     | 6.03                | 0            | PPARG     | Peroxisome proliferator-activated receptor gamma                     |
| P49959     | 5.22                | 0            | MRE11A    | Meiotic recombination 11 MRE11A                                      |
| Q92878     | 5.01                | 0            | RAD50     | DNA repair protein RAD50                                             |
| O95816     | 3.7                 | 1.71E-08     | BAG2      | BAG family molecular chaperone regulator 2                           |
| Q9UL15     | 2.9                 | 4.03E-07     | BAG5      | BAG family molecular chaperone regulator 5                           |
| O75594     | 2.56                | 2.25E-02     | PGLYRP1   | Peptidoglycan recognition protein 1                                  |
| P04637     | 2.46                | 7.99E-09     | TP53      | Cellular tumor antigen p53                                           |
| P62269     | 2.2                 | 0            | RPS18     | 40S ribosomal protein S18                                            |
| Q07021     | 2.1                 | 2.05E-08     | C1QBP     | Complement component 1 Q subcomponent-binding protein, mitochondrial |
| P23588     | 1.96                | 4.10E-10     | EIF4B     | Eukaryotic translation initiation factor 4B                          |
| Q02878     | 1.93                | 0            | RPL6      | 60S ribosomal protein L6                                             |
| P18124     | 1.9                 | 1.60E-13     | RPL7      | 60S ribosomal protein L7                                             |
| P34932     | 1.84                | 0            | HSPA4     | Heat shock 70 kDa protein 4                                          |
| P50914     | 1.8                 | 0            | RPL14     | 60S ribosomal protein L14                                            |
| O95071     | 1.8                 | 3.37E-02     | UBR5*     | E3 ubiquitin-protein ligase UBR5                                     |
| P98175     | 1.78                | 4.19E-11     | RBM10     | RNA-binding protein 10                                               |
| P62701     | 1.66                | 7.94E-07     | RPS4X     | 40S ribosomal protein S4, X isoform                                  |
| P62333     | 1.65                | 2.25E-03     | PSMC6*    | 26S protease regulatory subunit 10B                                  |
| Q9Y2W1     | 1.55                | 7.34E-11     | THRAP3*   | Thyroid hormone receptor-associated protein 3                        |
| P11142     | 1.54                | 0            | HSPA8     | Heat shock cognate 71 kDa protein                                    |

138  
 139 Proteins were co-purified with PPAR $\gamma$ -2xStrep and sequentially with Flag-NBS1 from 293T whole cell extracts  
 140 [unperturbed cells or with HU treatment (Supplementary Table 4)]. Log<sub>2</sub>FC indicates the fold enrichment of proteins  
 141 immunoprecipitated from the PPAR $\gamma$ -2xStrep and Flag-NBS1 expressing cells as compared to GFP-Strep-Flag  
 142 expressing cells (negative control). The adjusted P value is indicated and the data were obtained from three  
 143 independent experiments.

144 \* indicates proteins specifically enriched in unperturbed cells but not present in the HU treated cells. THRAP3 and  
 145 UBR5 (red) are validated in Fig. 1e, f. Proteins are listed by the Log<sub>2</sub>FC.

146 **Table S4**  
 147 **Tandem affinity purification identified proteins interacting with PPAR $\gamma$  and NBS1 upon HU treatment. –**  
 148 **Related to Figure 1.**

| Uniprot ID | Log <sub>2</sub> FC | Adj. P value | Gene name | Protein name                                                         |
|------------|---------------------|--------------|-----------|----------------------------------------------------------------------|
| O60934     | 6.25                | 0            | NBS1      | Nibrin                                                               |
| P37231     | 6.09                | 0            | PPARG     | Peroxisome proliferator-activated receptor gamma                     |
| P49959     | 5.02                | 0            | MRE11A    | Meiotic recombination 11 MRE11A                                      |
| Q92878     | 4.78                | 0            | RAD50     | DNA repair protein RAD50                                             |
| O95816     | 3.88                | 6.05E-09     | BAG2      | BAG family molecular chaperone regulator 2                           |
| Q9UL15     | 3.65                | 7.27E-08     | BAG5      | BAG family molecular chaperone regulator 5                           |
| Q92552     | 3.16                | 3.37E-02     | MRPS27*   | 28S ribosomal protein S27, mitochondrial                             |
| O75594     | 2.7                 | 2.17E-02     | PGLYRP1   | Peptidoglycan recognition protein 1                                  |
| Q02878     | 2.61                | 0            | RPL6      | 60S ribosomal protein L6                                             |
| P18124     | 2.58                | 0            | RPL7      | 60S ribosomal protein L7                                             |
| Q07021     | 2.36                | 1.18E-09     | C1QBP     | Complement component 1 Q subcomponent-binding protein, mitochondrial |
| P04637     | 2.08                | 6.15E-07     | TP53      | Cellular tumor antigen p53                                           |
| P50914     | 2.07                | 0            | RPL14     | 60S ribosomal protein L14                                            |
| P43686     | 1.89                | 1.08E-07     | PSMC4*    | 26S protease regulatory subunit 6B                                   |
| Q9BRT6     | 1.87                | 4.32E-02     | LLPH*     | Protein LLP homolog                                                  |
| O60318     | 1.83                | 2.30E-02     | MCM3AP*   | Germinal-center associated nuclear protein                           |
| P11388     | 1.82                | 3.49E-09     | TOP2A*    | DNA topoisomerase 2-alpha                                            |
| P23588     | 1.79                | 1.21E-09     | EIF4B     | Eukaryotic translation initiation factor 4B                          |
| P62269     | 1.78                | 0            | RPS18     | 40S ribosomal protein S18                                            |
| P98175     | 1.76                | 1.56E-11     | RBM10     | RNA-binding protein 10                                               |
| Q75N03     | 1.73                | 1.62E-02     | CBLL1*    | E3 ubiquitin-protein ligase Hakai                                    |
| P40429     | 1.71                | 2.38E-02     | RPL13A*   | 60S ribosomal protein L13a                                           |
| Q02880     | 1.7                 | 3.50E-04     | TOP2B*    | DNA topoisomerase 2-beta                                             |
| P36578     | 1.69                | 9.59E-14     | RPL4*     | 60S ribosomal protein L4                                             |
| Q9HAN9     | 1.67                | 3.64E-04     | NMNAT1*   | Nicotinamide/nicotinic acid mononucleotide adenylyltransferase 1     |
| P62917     | 1.65                | 0            | RPL8*     | 60S ribosomal protein L8                                             |
| Q07020     | 1.64                | 6.87E-10     | RPL18*    | 60S ribosomal protein L18                                            |
| P62266     | 1.62                | 6.37E-07     | RPS23*    | 40S ribosomal protein S23                                            |
| P62847     | 1.61                | 3.98E-09     | RPS24*    | 40S ribosomal protein S24                                            |
| P34932     | 1.61                | 8.63E-14     | HSPA4     | Heat shock 70 kDa protein 4                                          |
| P62701     | 1.59                | 9.46E-07     | RPS4X     | 40S ribosomal protein S4, X isoform                                  |
| P11142     | 1.58                | 0            | HSPA8     | Heat shock cognate 71 kDa protein                                    |
| P62158     | 1.56                | 2.83E-06     | CALM2*    | Calmodulin                                                           |
| P62249     | 1.55                | 5.53E-09     | RPS16*    | 40S ribosomal protein S16                                            |
| P62241     | 1.54                | 1.43E-08     | RPS8*     | 40S ribosomal protein S8                                             |
| P49368     | 1.51                | 2.20E-02     | CCT3*     | T-complex protein 1 subunit gamma                                    |

149  
 150 Proteins were co-purified with PPAR $\gamma$ -2xStrep and sequentially with Flag-NBS1 from 293T whole cell extracts with  
 151 HU treatment. Log<sub>2</sub>FC (Fold-Change) indicates the fold enrichment of proteins immunoprecipitated from the  
 152 PPAR $\gamma$ -2xStrep and Flag-NBS1 expressing cells as compared to GFP-Strep-Flag expressing cells (negative control).  
 153 The adjusted P value is indicated and the data were obtained from three independent experiments. \* indicates  
 154 proteins specifically enriched in the HU treated cells but not present in unperturbed cells. Proteins are listed by the  
 155 Log<sub>2</sub>FC.



156 **Table S5 – Related to STAR Methods.**  
 157 **Characteristics of (a) control subjects and (b) PAH patients used in this study.**  
 158 (a) Control

| <b>Control ID</b> | <b>Cells/<br/>Tissues</b> | <b>Assays</b>                       | <b>Age (yr)/<br/>Gender</b> | <b>Race/<br/>Ethnicity</b>        | <b>Cause of Death</b>                                                             |
|-------------------|---------------------------|-------------------------------------|-----------------------------|-----------------------------------|-----------------------------------------------------------------------------------|
| Control-1         | Tissue                    | IF                                  | 41/F                        | White/<br>Non-<br>Hispanic        | Grade 4 subarachnoid hemorrhage,<br>ruptured anterior cerebral artery<br>aneurysm |
| Control-2         | Tissue                    | IF                                  | 43/M                        | White/<br>Non-<br>Hispanic        | Fatal gunshot to head                                                             |
| Control-3         | Tissue                    | IF                                  | 57/F                        | White/<br>Non-<br>Hispanic        | Intracranial hemorrhage/stroke                                                    |
| Control-4         | Tissue                    | IF                                  | 28/F                        | White/<br>Non-<br>Hispanic        | MVC-anoxia                                                                        |
| Control-5         | SPAEC                     | Comet                               | 47/M                        | White/<br>Non-<br>Hispanic        | Head trauma-bicycle vs. car accident                                              |
| Control-6         | Tissue                    | IF                                  | 56/F                        | White/<br>Non-<br>Hispanic        | Cerebrovascular accident                                                          |
| Control-7         | SPAEC                     | Comet                               | 55/F                        | Unknown/<br>Hispanic<br>or Latino | Cerebrovascular stroke                                                            |
| Control-8         | Tissue/<br>LPAEC          | IF, comet,<br>protein<br>expression | 57-F                        | White/<br>Non-<br>Hispanic        | Acute myocardial infarction                                                       |
| Control-9         | LPAEC                     | Comet                               | 12/M                        | Unknown/<br>Non-<br>Hispanic      | Head trauma rollover MVC ejection                                                 |
| Control-10        | LPAEC                     | Comet                               | 49/M                        | White/<br>Non-<br>Hispanic        | Head trauma                                                                       |
| Control-11        | SPAEC                     | Protein<br>expression               | 33/F                        | White/<br>Non-<br>Hispanic        | Head trauma. Blunt injury.                                                        |

|             |       |                        |      |                            |                            |
|-------------|-------|------------------------|------|----------------------------|----------------------------|
| Control-12  | LPAEC | IP, protein expression | 54/M | Unknown/Hispanic or Latino | Cerebrovascular/stroke ICH |
| Control-13  | LPAEC | IP, protein expression | 34/F | Asian/Non-Hispanic         | Cerebrovascular/stroke ICH |
| Control-14  | LPAEC | IP                     | 1/M  | White/Non-Hispanic         | Anoxia/drowning            |
| Control-15* | LPAEC | IP, protein expression | 35/M | White/Non-Hispanic         | Gunshot wound              |
| Control-16  | LPAEC | IP, protein expression | 46/M | Asian/Unknown              | Cerebrovascular/stroke ICH |

159

160 (b) PAH patients

| Patient ID | Cells/Tissues      | Assays                 | Age (yr)/Gender | Race/Ethnicity                         | Diagnosis | BMPR2 mutation | (s/d/m)PAPa  | PVRb (mmHg) | 6 Min Walkc (Wood Units) | PAH Medications (m), up to transplant date       |
|------------|--------------------|------------------------|-----------------|----------------------------------------|-----------|----------------|--------------|-------------|--------------------------|--------------------------------------------------|
| PAH-1      | Tissue             | IF                     | 15-F            | White/Non-Hispanic                     | IPAH      | No             | (175/66/102) | 25.24       | 387                      | sildenafil, epoprostenol                         |
| PAH-2      | Tissue             | IF                     | 40-F            | White/Non-Hispanic                     | IPAH      | No             | (84/26/47)   | NA          | 294                      | ambrisentan, sildenafil, iloprost, epoprostenol  |
| PAH-3      | LPAEC              | Protein expresso<br>pm | 33-F            | Black or African American/Non-Hispanic | FPAH      | Yes            | (75/33/48)   | 15.57       | 326.1                    | epoprostenol, bosentan, sildenafil, treprostinil |
| PAH-4      | Tissue             | IF                     | 56-F            | White/Non-Hispanic                     | IPAH      | No             | (83/39/57)   | 11.41       | 137.2                    | sildenafil, ambrisentan, treprostinil            |
| PAH-5      | Tissue,S/<br>LPAEC | IF, comet,             | 27-F            | White/Non-Hispanic                     | IPAH      | Yes            | (110/49/69)  | 12.11       | 359.7                    | sildenafil, treprostinil, bosentan, iloprost     |

|        |                  |                                         |      |                                 |                             |     |             |       |       |                                                                                                          |
|--------|------------------|-----------------------------------------|------|---------------------------------|-----------------------------|-----|-------------|-------|-------|----------------------------------------------------------------------------------------------------------|
| PAH-6  | SPAEC            | Comet                                   | 40-M | White/<br>Hispanic<br>or Latino | IPAH                        | No  | (118/49/64) | 73    | 420   | sildenafil, ambrisentan,<br>treprostinil                                                                 |
| PAH-7  | SPAEC            | Comet                                   | 37-M | White/<br>Non-<br>Hispanic      | FPAH                        | Yes | (119/51/77) | 14.22 | 309   | sildenafil, sitaxsentan,<br>ambrisentan,<br>epoprostenol, imatinib<br>(investigational),<br>treprostinil |
| PAH-8  | LPAEC            | Comet, IP,<br>protein<br>expression     | 32-F | White/<br>Non-<br>Hispanic      | IPAH                        | No  | (68/38/49)  | 15.34 | 238   | bosentan, epoprostenol                                                                                   |
| PAH-9  | Tissue/<br>LPAEC | IF, comet,<br>IP, protein<br>expression | 30-M | White/<br>Non-<br>Hispanic      | APAH-<br>Congenita<br>I ASD | No  | (128/60/85) | NA    | 160   | sildenafil, bosentan                                                                                     |
| PAH-10 | LPAEC            | IP, protein<br>expression               | 16-F | White/<br>Non-<br>Hispanic      | IPAH                        | N/A | (NA/NA/95)  | N/A   | 102.4 | sildenafil, subcutaneous<br>treprostinil                                                                 |
| PAH-11 | LPAEC            | Protein<br>expression                   | 50-F | White/<br>Hispanic<br>or Latino | APAH-<br>D&T                | N/A | (113/43/65) | 16.18 | 384   | sildenafil, ambrisentan,<br>bosentan, treprostinil,<br>epoprostenol                                      |
| PAH-12 | LPAEC            | Protein<br>expression                   | 22-F | White/<br>Non-<br>Hispanic      | FPAH                        | Yes | (98/46/66)  | 10.19 | 506   | sildenafil, ambrisentan,<br>tadalafil, treprostinil                                                      |

161

162 a (s/d/m) PAP= Systolic, diastolic, and mean pulmonary arterial pressure. b PVR= Pulmonary vascular resistance. c 6 min walk = distance walked in six minutes.

163 a-c Values are closest to transplant date. \* Control line that did not meet PHBI inclusion criteria due to known history of amphetamine/methamphetamine use.

164 Abbreviations: SPAEC, small pulmonary arterial endothelial cells (<1 mm by dissection); LPAEC, large PAEC (>1 mm); IF, immunofluorescence; IP,

165 immunoprecipitation; F, female; M, male; MVC, motor vehicle accident; ICH, intracranial hemorrhage; IPAH, idiopathic pulmonary arterial hypertension;

166 FPAH, familiar PAH; APAH, associated PAH; ASD, atrial septal defect ; D&T, drug and toxin; NA, not available.

167 **Table S6 – Related to STAR Methods.**  
 168 **Table of Oligonucleotides used.**  
 169

| Oligo                   | Sequence (5'-3')                               | Description                                                   |
|-------------------------|------------------------------------------------|---------------------------------------------------------------|
| PPAR $\gamma$ -delLBD_F | GTGGCCATCCGCATCTGACAGGGCTGCCAGTTTCG            | Primer used for generating Flag-PPAR $\gamma$ $\Delta$ LBD    |
| PPAR $\gamma$ -delLBD_R | CGAAACTGGCAGCCCTGTCAGATGCCGATGGCCAC            | Primer used for generating Flag-PPAR $\gamma$ $\Delta$ LBD    |
| 2Strep-PPAR $\gamma$ -F | TAGTCCAGTGTGGTGGAAATTCGCCGCATGACCATGGTTGACACAG | Primer used for generating 2xStrep-PPAR $\gamma$              |
| 2Strep-PPAR $\gamma$ -R | CACCGCCTCCCTCGAGCGGCCGCACGTACAAGTCCTTGATG      | Primer used for generating 2xStrep-PPAR $\gamma$              |
| siRES-PPAR $\gamma$ _F  | ATGACAGCGATCTCGCAATATTTATTGCTGTCAATTATC        | Primer used for generating siRNA-resistant-Flag-PPAR $\gamma$ |
| siRES-PPAR $\gamma$ _R  | TAAATATTGCGAGATCGCTGTCATCTAATTCCAGTG           | Primer used for generating siRNA-resistant-Flag-PPAR $\gamma$ |
| PPAR $\gamma$ _F        | GCCGTGGCCGCAGATTTGAAAGA                        | Primer used for quantitative real-time PCR                    |
| PPAR $\gamma$ _R        | TACGGAGAGATCCACGGAGCTGA                        | Primer used for quantitative real-time PCR                    |
| UBR5_F                  | CCTGCTCACTGCTACTAATCTG                         | Primer used for quantitative real-time PCR                    |
| UBR5_R                  | ATTCGAGGTGGCCTGTATTG                           | Primer used for quantitative real-time PCR                    |
| ATMIN_F                 | AACAGCACTGCAGTCTCACAA                          | Primer used for quantitative real-time PCR                    |
| ATMIN_R                 | CTGGTCTAGGGATTGGTTGGT                          | Primer used for quantitative real-time PCR                    |
| NBS1_F                  | CACTCACCTTGTCATGGTATCAG                        | Primer used for quantitative real-time PCR                    |
| NBS1_R                  | CTGCTTCTTGGACTCAA CTGC                         | Primer used for quantitative real-time PCR                    |
| PLIN2_F                 | ATGGCATCCGTTGCAGTTGAT                          | Primer used for quantitative real-time PCR                    |
| PLIN2_R                 | GGACATGAGGTCATACGTGGAG                         | Primer used for quantitative real-time PCR                    |
| ACOX1_F                 | GGAACCTCACCTTCGAGGCTTG                         | Primer used for quantitative real-time PCR                    |
| ACOX1_R                 | TTCCCCTTAGTGATGAGCTGG                          | Primer used for quantitative real-time PCR                    |
| CPT1B_F                 | CCTGCTACATGGCAACTGCTA                          | Primer used for quantitative real-time PCR                    |
| CPT1B_R                 | AGAGGTGCCCAATGATGGGA                           | Primer used for quantitative real-time PCR                    |
| ACSF2_F                 | ATGGCTGTCTACGTCCGGG                            | Primer used for quantitative real-time PCR                    |
| ACSF2_R                 | GACCATGCGATCCACCTCTC                           | Primer used for quantitative real-time PCR                    |
| ME1_F                   | CTGCTGACACGGAACCCTC                            | Primer used for quantitative real-time PCR                    |
| ME1_R                   | GATCTCCTGACTGTTGAAGGAAG                        | Primer used for quantitative real-time PCR                    |
| CFD_F                   | GACACCATCGACCACGACC                            | Primer used for quantitative real-time PCR                    |
| CFD_R                   | GCCACGTCGCAGAGAGTTC                            | Primer used for quantitative real-time PCR                    |
| IDH3A_F                 | GGACCTGGAGGAAAGTGGAT                           | Primer used for quantitative real-time PCR                    |
| IDH3A_R                 | GCTGCTATTGGGGTCTTCAA                           | Primer used for quantitative real-time PCR                    |
| $\beta$ -actin_F        | CATGCCATCCTGCGTCTGGA                           | Primer used for quantitative real-time PCR                    |
| $\beta$ -actin_R        | CCGTGGCCATCTCTTGCTCG                           | Primer used for quantitative real-time PCR                    |
